# Supplementary material
Source: PubMed Central journal article supplement (PMC4248991)

**Table S9. mRNA expression levels of T. ni homologs associated with endocytosis.**

| Complex / Category   | Gene*                               | T. ni Ortholog       | RPKM     |         |         |         |         |         |        |        | STDEV |        |      |       |      |       |       |       |      |
|----------------------|-------------------------------------|----------------------|----------|---------|---------|---------|---------|---------|--------|--------|-------|--------|------|-------|------|-------|-------|-------|------|
|                      |                                     |                      | C        | 0       | 6       | 12      | 18      | 24      | 36     | 48     | C     | 0      | 6    | 12    | 18   | 24    | 36    | 48    |      |
| Nucleation           | FCHO2                               | UN040353             | 18.87    | 20.95   | 20.38   | 12.41   | 8.08    | 6.43    | 3.32   | 2.00   | 0.39  | 1.28   | 1.04 | 0.98  | 0.43 | 0.11  | 0.28  | 0.1   |      |
|                      |                                     | UN009494             | 1.39     | 0.89    | 1.20    | 0.75    | 0.24    | 0.22    | 0.31   | 0.14   | 0.33  | 0.31   | 0.25 | 0.08  | 0.25 | 0.19  | 0.11  | 0.07  |      |
|                      | Eps15                               | UN011157             | 1.10     | 1.08    | 1.45    | 0.68    | 0.19    | 0.27    | 0.16   | 0.12   | 0.66  | 0.45   | 0.32 | 0.43  | 0.17 | 0.23  | 0.18  | 0.11  |      |
|                      |                                     | UN013798             | 1.03     | 0.83    | 1.09    | 0.70    | 0.37    | 0.22    | 0.05   | 0.08   | 0.56  | 0.24   | 0.13 | 0.45  | 0.14 | 0.11  | 0.09  | 0.08  |      |
|                      |                                     | UN002595             | 6.81     | 3.09    | 4.68    | 2.57    | 1.34    | 0.81    | 0.34   | 0.11   | 0.56  | 0.18   | 0.58 | 0.28  | 0.33 | 0.04  | 0.15  | 0.06  |      |
|                      |                                     | UN003280             | 2.94     | 2.95    | 2.96    | 2.44    | 1.27    | 0.73    | 0.37   | 0.21   | 0.78  | 0.79   | 0.72 | 0.4   | 0.17 | 0.11  | 0.11  | 0.08  |      |
| Intersectin          | UN005672                            | 3.44                 | 2.58     | 3.97    | 2.11    | 1.30    | 0.66    | 0.24    | 0.07   | 1.50   | 0.79  | 0.7    | 0.55 | 0.59  | 0.26 | 0.13  | 0.11  |       |      |
|                      | UN060218                            | 12.21                | 7.82     | 15.33   | 5.70    | 3.65    | 3.16    | 0.60    | 0.31   | 0.34   | 0.18  | 0.95   | 0.75 | 0.38  | 0.99 | 0.14  | 0.06  |       |      |
| Cargo selection      | AP2A2                               | UN047885             | 7.37     | 7.32    | 13.00   | 8.25    | 5.10    | 4.62    | 2.63   | 1.65   | 0.28  | 0.51   | 1.1  | 0.5   | 0.21 | 0.09  | 0.39  | 0.04  |      |
|                      |                                     | UN014947             | 44.00    | 53.90   | 54.16   | 25.95   | 14.18   | 8.62    | 3.00   | 1.14   | 0.89  | 2.21   | 1.02 | 1.46  | 0.84 | 0.75  | 0.58  | 0.24  |      |
|                      | AP2B1                               | UN011341             | 26.64    | 46.90   | 59.71   | 33.70   | 17.69   | 10.86   | 4.88   | 2.00   | 1.43  | 1.03   | 2.8  | 0.98  | 1.19 | 0.4   | 0.59  | 0.21  |      |
|                      |                                     | UN063500             | 86.79    | 89.01   | 116.07  | 85.00   | 54.28   | 39.01   | 18.69  | 11.62  | 2.03  | 0.77   | 4.53 | 0.25  | 1.89 | 1.03  | 0.65  | 0.28  |      |
|                      | AP2S1                               | UN007037             | 30.41    | 41.94   | 82.27   | 46.00   | 28.14   | 22.62   | 8.76   | 3.28   | 1.14  | 1.82   | 4.6  | 3.15  | 0.83 | 1.79  | 0.18  | 0.27  |      |
|                      | Epsin1                              | UN027037             | 29.28    | 32.32   | 22.83   | 9.46    | 5.81    | 4.17    | 2.44   | 1.17   | 2.83  | 2.80   | 1.12 | 0.58  | 0.6  | 0.57  | 0.4   | 0.27  |      |
|                      | Epsin2                              | UN027034             | 28.38    | 32.70   | 21.63   | 8.81    | 5.39    | 4.13    | 2.27   | 1.18   | 2.70  | 2.78   | 1.24 | 0.28  | 0.53 | 0.77  | 0.42  | 0.23  |      |
|                      | Epsin2                              | UN027035             | 30.85    | 35.79   | 23.81   | 9.65    | 5.95    | 4.28    | 2.39   | 1.33   | 3.03  | 3.12   | 1.32 | 0.41  | 0.61 | 0.72  | 0.35  | 0.21  |      |
|                      | Epsin2                              | UN027036             | 29.85    | 31.75   | 22.87   | 10.18   | 6.28    | 4.51    | 2.44   | 1.16   | 3.33  | 2.54   | 1.56 | 0.69  | 0.63 | 0.45  | 0.3   | 0.31  |      |
|                      | AP180                               | UN026112             | 46.47    | 26.29   | 24.58   | 12.66   | 8.15    | 5.40    | 2.52   | 1.12   | 1.62  | 1.23   | 1.3  | 0.53  | 1.02 | 0.67  | 0.51  | 0.41  |      |
|                      |                                     | UN048726             | 30.95    | 21.33   | 22.85   | 11.29   | 6.34    | 3.98    | 2.70   | 0.99   | 1.10  | 2.24   | 2.47 | 0.48  | 1.99 | 0.75  | 0.08  | 0.26  |      |
|                      | HIP1                                | UN063828             | 12.95    | 12.10   | 4.89    | 2.15    | 1.23    | 0.88    | 0.73   | 0.27   | 2.29  | 0.78   | 0.77 | 0.63  | 0.89 | 0.46  | 0.43  | 0.34  |      |
|                      |                                     | UN046737             | 29.67    | 26.02   | 14.19   | 7.32    | 4.59    | 2.19    | 1.44   | 0.57   | 1.11  | 1.04   | 0.4  | 0.22  | 0.4  | 0.36  | 0.07  | 0.12  |      |
|                      | UN046738                            | 9.15                 | 10.99    | 4.86    | 2.83    | 1.76    | 0.80    | 0.61    | 0.30   | 0.93   | 0.38  | 0.41   | 0.17 | 0.31  | 0.12 | 0.04  | 0.11  |       |      |
|                      | Coat assembly                       | Clathrin heavy chain | UN005722 | 43.72   | 51.20   | 47.67   | 30.94   | 17.75   | 12.99  | 8.27   | 4.57  | 0.84   | 1.71 | 1.1   | 1.42 | 1.11  | 0.51  | 0.23  | 0.57 |
|                      |                                     |                      | UN005723 | 43.87   | 51.47   | 48.01   | 31.14   | 17.88   | 13.09  | 8.32   | 4.58  | 0.90   | 1.72 | 1.07  | 1.44 | 1.11  | 0.51  | 0.22  | 0.58 |
| Clathrin heavy chain |                                     | UN014999             | 1.20     | 0.11    | 0.42    | 0.72    | 0.53    | 0.17    | 0.24   | 0.29   | 0.23  | 0.14   | 0.32 | 0.2   | 0.13 | 0.2   | 0.24  | 0.18  |      |
| Clathrin heavy chain |                                     | UN015987             | 0.68     | 0.43    | 0.25    | 0.52    | 0.30    | 0.41    | 0.28   | 0.10   | 0.20  | 0.35   | 0.14 | 0.08  | 0.14 | 0.07  | 0.17  | 0.08  |      |
| Clathrin heavy chain |                                     | UN063236             | 0.99     | 0.87    | 1.18    | 1.22    | 0.93    | 0.53    | 0.48   | 0.45   | 0.48  | 0.08   | 0.18 | 0.22  | 0.29 | 0.33  | 0.08  | 0.25  |      |
| Clathrin light chain |                                     | UN033438             | 189.69   | 185.45  | 263.24  | 175.03  | 106.40  | 81.06   | 30.97  | 11.30  | 6.09  | 7.50   | 9.19 | 6.69  | 3.82 | 3.74  | 1.15  | 0.24  |      |
|                      |                                     | UN033439             | 94.76    | 141.19  | 233.60  | 120.85  | 77.03   | 55.84   | 19.80  | 8.17   | 4.16  | 8.06   | 4.39 | 13.64 | 7.07 | 6.88  | 0.43  | 2.63  |      |
| Scission             | SNX9                                | UN016210             | 32.19    | 35.65   | 39.26   | 18.52   | 13.67   | 11.64   | 4.98   | 2.12   | 1.02  | 1.36   | 1.06 | 1.02  | 1.29 | 0.51  | 0.43  | 0.03  |      |
|                      |                                     | UN016211             | 34.69    | 38.60   | 42.40   | 19.98   | 14.70   | 12.59   | 5.39   | 2.32   | 1.08  | 1.43   | 1.13 | 1.16  | 1.39 | 0.54  | 0.44  | 0.04  |      |
|                      | Amphiphysin2                        | UN069370             | 5.91     | 5.44    | 6.21    | 4.19    | 3.27    | 1.91    | 0.49   | 0.42   | 0.26  | 0.79   | 0.26 | 0.61  | 0.7  | 0.6   | 0.13  | 0.25  |      |
|                      | Amphiphysin2                        | UN002455             | 3.55     | 4.19    | 4.08    | 3.01    | 2.29    | 1.27    | 0.62   | 0.39   | 0.92  | 0.35   | 0.57 | 0.54  | 0.41 | 0.33  | 0.39  | 0.25  |      |
|                      | Dynamitin                           | UN031377             | 31.61    | 39.53   | 26.20   | 13.02   | 7.25    | 5.33    | 3.04   | 1.30   | 0.89  | 1.24   | 0.9  | 0.57  | 0.57 | 0.5   | 0.36  | 0.13  |      |
| Uncoating            | HSC70                               | UN059101             | 4220.74  | 6035.30 | 3956.62 | 3208.57 | 1995.66 | 1249.91 | 702.51 | 265.29 | 50.53 | 113.26 | 34   | 85.52 | 6.95 | 30.06 | 24.69 | 15.41 |      |
|                      |                                     | UN065667             | 4.48     | 4.03    | 5.57    | 3.21    | 1.77    | 1.30    | 0.65   | 0.24   | 0.40  | 0.59   | 0.26 | 0.19  | 0.4  | 0.3   | 0.08  | 0.12  |      |
|                      | Synaptojanin1                       | UN002448             | 3.90     | 2.49    | 4.09    | 2.40    | 1.43    | 1.21    | 0.36   | 0.35   | 0.21  | 0.40   | 0.36 | 0.21  | 0.09 | 0.05  | 0.11  | 0.22  |      |
|                      | N-WASP                              | UN066639             | 10.39    | 8.41    | 8.30    | 3.36    | 2.48    | 1.58    | 1.46   | 0.66   | 0.35  | 1.13   | 1.22 | 0.57  | 0.55 | 0.31  | 0.39  | 0.28  |      |
|                      | N-WASP                              | UN006410             | 1.61     | 1.95    | 2.77    | 1.36    | 0.92    | 0.73    | 0.36   | 0.34   | 0.17  | 0.57   | 1.19 | 0.4   | 0.95 | 0.27  | 0.32  | 0.3   |      |
|                      | Arp2                                | UN012801             | 30.58    | 51.55   | 55.70   | 39.47   | 18.80   | 12.42   | 5.32   | 2.98   | 1.34  | 1.99   | 3.05 | 0.92  | 0.29 | 0.82  | 0.15  | 0.28  |      |
|                      | Arp3                                | UN064270             | 48.23    | 126.36  | 179.84  | 70.99   | 40.36   | 27.52   | 9.62   | 3.52   | 1.27  | 1.25   | 2.16 | 3.45  | 0.9  | 1.5   | 0.65  | 0.3   |      |
| Other                | lipophorin receptor                 | UN005188             | 66.88    | 39.04   | 5.39    | 4.94    | 3.62    | 5.58    | 3.56   | 1.90   | 1.33  | 0.61   | 0.25 | 0.18  | 0.11 | 0.31  | 0.31  | 0.09  |      |
|                      |                                     | UN005189             | 63.63    | 38.20   | 5.79    | 5.07    | 3.50    | 5.34    | 3.46   | 1.87   | 0.43  | 0.37   | 0.24 | 0.3   | 0.29 | 0.35  | 0.41  | 0.05  |      |
|                      | lipophorin receptor                 | UN005190             | 77.26    | 45.72   | 5.42    | 6.47    | 4.96    | 8.51    | 5.28   | 2.87   | 1.10  | 1.89   | 0.51 | 0.38  | 0.19 | 0.1   | 0.36  | 0.3   |      |
|                      | lipophorin receptor                 | UN005191             | 73.39    | 45.42   | 6.11    | 6.94    | 5.00    | 8.67    | 5.40   | 2.99   | 0.68  | 1.57   | 0.59 | 0.64  | 0.48 | 0.32  | 0.53  | 0.14  |      |
|                      | nonclathrin coat protein gamma1-COP | UN022302             | 32.02    | 33.45   | 37.22   | 21.92   | 11.96   | 7.92    | 2.86   | 1.27   | 2.66  | 2.12   | 0.84 | 1.08  | 0.45 | 0.19  | 0.56  | 0.31  |      |
|                      | nonclathrin coat protein gamma1-COP | UN023807             | 20.94    | 33.52   | 36.03   | 25.34   | 13.06   | 8.95    | 4.07   | 1.81   | 1.53  | 0.54   | 1.31 | 0.85  | 1.08 | 0.33  | 0.51  | 0.53  |      |
|                      | nonclathrin coat protein gamma2-COP | UN044805             | 14.60    | 13.99   | 18.82   | 10.20   | 5.75    | 3.26    | 1.21   | 0.62   | 0.71  | 0.67   | 0.46 | 0.15  | 0.3  | 0.05  | 0.19  | 0.18  |      |

\* Grey color indicates unigenes with expression level less than 5 RPKM at all time points



**Table S11. mRNA expression levels of T. ni homologs associated with PIK3.**

| Complex / Category |           | Gene*               | T. ni Ortholog | RPKM     |       |       |       |       |       |      |      | STDEV |      |      |      |      |      |      |      |      |
|--------------------|-----------|---------------------|----------------|----------|-------|-------|-------|-------|-------|------|------|-------|------|------|------|------|------|------|------|------|
|                    |           |                     |                | C        | 0     | 6     | 12    | 18    | 24    | 36   | 48   | C     | 0    | 6    | 12   | 18   | 24   | 36   | 48   |      |
| PIK3               | Class I   | Catalytic subunits  | Dp110          | UN002968 | 17.28 | 5.17  | 3.16  | 1.57  | 0.95  | 0.77 | 0.49 | 0.30  | 0.39 | 0.76 | 0.49 | 0.41 | 0.36 | 0.35 | 0.33 | 0.24 |
|                    |           | Regulatory subunits | p60            | UN067526 | 4.90  | 4.08  | 4.26  | 2.86  | 2.07  | 1.93 | 1.41 | 0.94  | 0.17 | 0.46 | 0.5  | 0.12 | 0.22 | 0.06 | 0.16 | 0.2  |
|                    | Class II  | Catalytic subunits  | p60            | UN067527 | 5.00  | 4.27  | 4.38  | 2.90  | 2.03  | 1.96 | 1.45 | 0.95  | 0.26 | 0.51 | 0.45 | 0.18 | 0.22 | 0.08 | 0.2  | 0.23 |
|                    |           | Regulatory subunits | pi3k_68D       | UN060409 | 7.48  | 8.62  | 8.67  | 6.49  | 3.71  | 2.68 | 1.77 | 1.13  | 0.27 | 0.11 | 0.47 | 0.25 | 0.17 | 0.21 | 0.26 | 0.13 |
|                    | Class III | Catalytic subunits  | Vps34          | UN063291 | 6.22  | 10.81 | 9.03  | 5.45  | 3.25  | 2.06 | 1.26 | 0.80  | 0.27 | 0.49 | 0.63 | 0.21 | 0.39 | 0.07 | 0.27 | 0.21 |
|                    |           |                     | Ird1           | UN066671 | 8.84  | 7.52  | 6.35  | 3.24  | 1.93  | 0.83 | 0.63 | 0.28  | 1.32 | 0.46 | 0.38 | 0.32 | 0.22 | 0.2  | 0.39 | 0.15 |
|                    |           | Regulatory subunits | Ird1           | UN041295 | 3.99  | 3.33  | 3.74  | 3.04  | 1.90  | 1.31 | 0.75 | 0.44  | 0.14 | 0.22 | 0.25 | 0.22 | 0.21 | 0.04 | 0.08 | 0.04 |
|                    |           |                     | Ird1           | UN041381 | 5.17  | 4.46  | 5.63  | 8.55  | 3.51  | 2.86 | 1.41 | 1.10  | 0.25 | 0.34 | 0.34 | 0.48 | 0.12 | 0.38 | 0.16 | 0.14 |
|                    |           |                     | beclin 1       | UN064841 | 7.62  | 6.90  | 7.98  | 4.40  | 3.24  | 2.51 | 0.92 | 0.53  | 1.67 | 0.40 | 0.38 | 0.18 | 0.53 | 0.24 | 0.16 | 0.04 |
|                    |           |                     | UVRAG          | UN068281 | 3.64  | 2.10  | 2.35  | 1.62  | 1.08  | 0.75 | 0.51 | 0.41  | 0.12 | 0.36 | 0.07 | 0.24 | 0.13 | 0.09 | 0.09 | 0.03 |
|                    | BIF1      | UN047139            | 9.22           | 11.84    | 11.86 | 10.08 | 7.33  | 6.41  | 2.84  | 1.66 | 0.82 | 0.90  | 0.52 | 0.46 | 0.62 | 0.15 | 0.04 | 0.2  |      |      |
|                    | Akt/PKB   | Akt/PKB             | UN018533       | 25.72    | 43.50 | 55.07 | 36.72 | 19.26 | 14.30 | 6.27 | 2.63 | 0.44  | 1.40 | 1.94 | 0.19 | 0.97 | 0.86 | 0.79 | 0.36 |      |

\* Grey color indicates unigenes with expression level less than 5 RPKM at all time points

Abbreviation: ATG14L, autophagy-related protein 14-like protein UVRAG, BIF1, Bax-interaction factor 1, Dp110, Drosophila melanogaster p110, PI3K, Phosphoinositide 3-kinases, PKB, protein kinase B, Vps, vacuolar protein sorting, UVRAG, ultraviolet radiation resistance-associated protein

**Table S12. mRNA expression levels of T. ni homologs associated with MAP kinase signaling pathways.**

| Complex / Category                    | Gene*                                 | T. ni Ortholog | RPKM  |        |        |       |       |       |       |      | STDEV |      |      |      |      |      |      |      |
|---------------------------------------|---------------------------------------|----------------|-------|--------|--------|-------|-------|-------|-------|------|-------|------|------|------|------|------|------|------|
|                                       |                                       |                | C     | 0      | 6      | 12    | 18    | 24    | 36    | 48   | C     | 0    | 6    | 12   | 18   | 24   | 36   | 48   |
| MAP kinase                            | MAP kinase kinase (hep)               | UN020647       | 28.03 | 30.08  | 30.68  | 33.30 | 16.96 | 10.51 | 5.86  | 4.08 | 0.93  | 0.28 | 1.41 | 0.56 | 0.89 | 0.51 | 0.59 | 0.14 |
|                                       | MAP kinase kinase 3/4/6               | UN023339       | 22.97 | 28.57  | 57.32  | 26.06 | 17.03 | 14.21 | 5.89  | 2.31 | 0.83  | 0.70 | 1.98 | 0.7  | 0.62 | 0.64 | 0.53 | 0.36 |
|                                       | MAP kinase kinase 3/4/6               | UN066938       | 3.46  | 3.86   | 4.96   | 4.03  | 2.59  | 1.67  | 0.98  | 0.58 | 0.50  | 0.40 | 0.44 | 0.5  | 0.2  | 0.15 | 0.12 | 0.02 |
|                                       | MAP kinase kinase 4                   | UN028639       | 2.52  | 5.08   | 6.63   | 4.18  | 3.68  | 3.54  | 2.23  | 1.24 | 0.28  | 0.52 | 0.54 | 0.76 | 0.24 | 0.23 | 0.38 | 0.2  |
|                                       | MAP kinase kinase 4                   | UN028641       | 8.31  | 12.48  | 21.50  | 11.57 | 9.84  | 9.51  | 5.89  | 2.24 | 0.40  | 0.97 | 1.08 | 1.38 | 0.34 | 0.33 | 0.55 | 0.17 |
|                                       | MAP kinase kinase 4                   | UN049071       | 5.51  | 6.01   | 14.98  | 7.63  | 5.10  | 3.35  | 1.07  | 0.63 | 0.22  | 0.38 | 1    | 0.52 | 0.18 | 0.39 | 0.22 | 0.05 |
|                                       | MAP kinase kinase 4                   | UN066579       | 58.29 | 78.32  | 130.34 | 58.97 | 35.36 | 28.64 | 10.90 | 3.25 | 0.68  | 1.60 | 4.73 | 2.43 | 0.98 | 0.7  | 0.63 | 0.59 |
|                                       | MAP kinase kinase 4                   | UN066580       | 71.48 | 89.34  | 153.92 | 69.88 | 41.47 | 34.57 | 13.13 | 3.70 | 0.16  | 2.20 | 5.5  | 3.15 | 1.55 | 0.9  | 0.9  | 0.62 |
|                                       | MAP kinase kinase 4                   | UN069980       | 9.40  | 4.79   | 6.31   | 3.55  | 1.71  | 1.24  | 0.53  | 0.39 | 1.07  | 0.86 | 0.74 | 0.5  | 0.71 | 0.24 | 0.09 | 0.19 |
|                                       | MAP kinase phosphatase-1 (Dmkp-1)     | UN062932       | 5.98  | 5.54   | 11.14  | 8.98  | 5.28  | 3.25  | 1.30  | 0.62 | 0.16  | 0.39 | 1    | 0.7  | 0.37 | 0.19 | 0.13 | 0.04 |
|                                       | MAP kinase phosphatase-1 (Dmkp-1)     | UN062933       | 6.14  | 5.70   | 11.59  | 9.26  | 5.46  | 3.36  | 1.31  | 0.62 | 0.19  | 0.50 | 0.98 | 0.67 | 0.43 | 0.22 | 0.13 | 0.02 |
|                                       | MAP kinase phosphatase-1 (Dmkp-1)     | UN063348       | 5.70  | 7.60   | 10.85  | 5.07  | 3.56  | 2.69  | 1.30  | 0.71 | 0.21  | 0.36 | 0.3  | 0.43 | 0.27 | 0.05 | 0.1  | 0.24 |
|                                       | MAP kinase phosphatase-1 (Dmkp-1)     | UN063349       | 6.35  | 8.02   | 11.70  | 5.41  | 3.74  | 2.78  | 1.35  | 0.73 | 0.33  | 0.41 | 0.43 | 0.46 | 0.28 | 0.05 | 0.09 | 0.22 |
|                                       | Ras85D                                | UN067243       | 41.39 | 49.22  | 55.50  | 38.27 | 23.25 | 18.25 | 9.24  | 6.28 | 0.61  | 2.36 | 1.91 | 1.33 | 0.79 | 0.42 | 0.27 | 0.38 |
|                                       | Ras85D                                | UN031780       | 13.06 | 17.37  | 21.51  | 13.54 | 8.65  | 5.50  | 3.00  | 1.85 | 0.44  | 0.70 | 0.85 | 0.62 | 0.36 | 0.27 | 0.52 | 0.11 |
|                                       | Ras85D                                | UN050418       | 98.63 | 161.30 | 180.69 | 95.76 | 50.46 | 37.34 | 15.11 | 7.67 | 2.57  | 6.20 | 3.15 | 4.9  | 1.42 | 1.03 | 1.44 | 0.62 |
|                                       | phl (Dsim\phl)                        | UN067576       | 4.97  | 5.45   | 5.17   | 3.77  | 2.25  | 1.26  | 1.10  | 0.67 | 0.65  | 0.38 | 0.26 | 0.14 | 0.28 | 0.19 | 0.24 | 0.08 |
|                                       | phl (Dsim\phl)                        | UN067577       | 5.22  | 5.30   | 4.97   | 3.66  | 2.15  | 1.30  | 1.09  | 0.73 | 0.54  | 0.39 | 0.38 | 0.25 | 0.31 | 0.18 | 0.25 | 0.13 |
|                                       | phl (Dsim\phl)                        | UN067579       | 4.27  | 5.12   | 4.98   | 3.65  | 2.05  | 1.06  | 1.07  | 0.50 | 0.75  | 0.33 | 0.25 | 0.24 | 0.33 | 0.23 | 0.32 | 0.13 |
|                                       | phl (Dsim\phl)                        | UN067578       | 5.45  | 5.40   | 5.05   | 3.62  | 2.08  | 1.37  | 1.09  | 0.77 | 0.57  | 0.41 | 0.47 | 0.23 | 0.33 | 0.09 | 0.2  | 0.19 |
|                                       | phl (Dsim\phl)                        | UN067580       | 5.46  | 5.21   | 4.85   | 3.50  | 1.99  | 1.30  | 1.05  | 0.75 | 0.50  | 0.48 | 0.53 | 0.3  | 0.25 | 0.14 | 0.18 | 0.2  |
|                                       | phl (Dsim\phl)                        | UN067581       | 4.45  | 4.83   | 4.66   | 3.47  | 1.86  | 1.06  | 1.04  | 0.55 | 0.63  | 0.36 | 0.36 | 0.44 | 0.42 | 0.21 | 0.33 | 0.14 |
|                                       | phl (Dsim\phl)                        | UN067582       | 4.67  | 4.90   | 4.74   | 3.38  | 1.71  | 1.12  | 1.05  | 0.58 | 0.66  | 0.35 | 0.47 | 0.45 | 0.48 | 0.09 | 0.27 | 0.2  |
|                                       | phl (Dsim\phl)                        | UN067583       | 4.66  | 4.62   | 4.43   | 3.21  | 1.57  | 1.02  | 0.99  | 0.54 | 0.51  | 0.45 | 0.53 | 0.55 | 0.37 | 0.17 | 0.25 | 0.26 |
|                                       | stress-activated p38a/p38b MAP kinase | UN006627       | 2.54  | 3.53   | 1.51   | 1.22  | 0.41  | 0.52  | 0.39  | 0.17 | 0.63  | 0.05 | 0.34 | 0.14 | 0.02 | 0.24 | 0.2  | 0.09 |
|                                       | stress-activated p38a/p38b MAP kinase | UN015143       | 32.14 | 32.84  | 48.66  | 35.10 | 20.89 | 16.20 | 8.41  | 4.23 | 0.77  | 1.08 | 2.95 | 0.97 | 0.4  | 1.21 | 0.21 | 0.4  |
|                                       | stress-activated p38a/p38b MAP kinase | UN015144       | 28.43 | 29.99  | 45.49  | 33.59 | 19.99 | 15.56 | 8.18  | 4.15 | 0.68  | 1.04 | 2.98 | 1.12 | 0.47 | 1.16 | 0.29 | 0.45 |
|                                       | stress-activated p38a/p38b MAP kinase | UN015145       | 20.57 | 23.73  | 37.71  | 29.71 | 17.72 | 13.42 | 7.55  | 4.16 | 0.83  | 1.00 | 2.66 | 1.28 | 0.29 | 1.08 | 0.24 | 0.4  |
|                                       | stress-activated p38a/p38b MAP kinase | UN015146       | 17.57 | 15.62  | 20.43  | 11.78 | 6.97  | 6.01  | 2.39  | 0.98 | 0.13  | 1.31 | 1.32 | 0.17 | 0.48 | 1.46 | 0.14 | 0.23 |
|                                       | stress-activated p38a/p38b MAP kinase | UN019909       | 23.95 | 29.11  | 26.37  | 17.86 | 10.12 | 9.22  | 4.94  | 3.37 | 0.58  | 1.06 | 0.74 | 0.24 | 0.45 | 0.73 | 0.46 | 0.27 |
|                                       | stress-activated p38a/p38b MAP kinase | UN022961       | 10.97 | 27.66  | 25.89  | 17.47 | 10.41 | 8.83  | 4.30  | 3.10 | 0.65  | 0.63 | 0.43 | 0.96 | 0.27 | 0.42 | 0.33 | 0.27 |
|                                       | stress-activated p38a/p38b MAP kinase | UN022962       | 11.60 | 28.79  | 26.98  | 18.16 | 10.80 | 9.11  | 4.41  | 3.16 | 0.68  | 0.63 | 0.43 | 0.99 | 0.35 | 0.43 | 0.35 | 0.23 |
|                                       | stress-activated p38a/p38b MAP kinase | UN022963       | 11.33 | 28.82  | 26.61  | 17.98 | 10.78 | 9.14  | 4.43  | 3.24 | 0.69  | 0.66 | 0.55 | 1    | 0.29 | 0.38 | 0.33 | 0.29 |
| stress-activated p38a/p38b MAP kinase | UN022964                              | 11.99          | 30.02 | 27.77  | 18.70  | 11.20 | 9.44  | 4.55  | 3.30  | 0.72 | 0.66  | 0.56 | 1.04 | 0.36 | 0.39 | 0.35 | 0.25 |      |

\* Grey color indicates unigenes with expression level less than 5 RPKM at all time points

**Table S13. mRNA expression levels of T. ni homologs associated with the Nuclear Pore Complex (NPC).**

| Complex / Category              | Gene*            | T. ni Ortholog | RPKM  |       |        |       |       |       |       |      | STDEV |      |      |      |      |      |      |      |
|---------------------------------|------------------|----------------|-------|-------|--------|-------|-------|-------|-------|------|-------|------|------|------|------|------|------|------|
|                                 |                  |                | C     | 0     | 6      | 12    | 18    | 24    | 36    | 48   | C     | 0    | 6    | 12   | 18   | 24   | 36   | 48   |
| Central FG-Nups                 | Nup54-like       | UN037243       | 18.66 | 21.70 | 25.74  | 15.14 | 8.65  | 5.05  | 1.54  | 0.93 | 2.47  | 1.46 | 1.8  | 0.68 | 0.41 | 0.26 | 0.21 | 0.23 |
|                                 | Nup54-like       | UN045238       | 10.21 | 17.14 | 20.98  | 13.78 | 7.27  | 4.87  | 2.31  | 0.90 | 2.81  | 1.49 | 0.86 | 1.29 | 0.7  | 0.78 | 0.2  | 0.13 |
|                                 | Nup58-like       | UN042519       | 6.31  | 9.73  | 13.00  | 6.86  | 3.53  | 2.53  | 1.01  | 0.40 | 1.18  | 1.01 | 0.66 | 0.57 | 0.31 | 0.08 | 0.05 | 0.22 |
|                                 | Nup58-like       | UN042520       | 8.06  | 11.94 | 15.80  | 8.41  | 4.31  | 3.17  | 1.21  | 0.46 | 1.53  | 1.18 | 0.72 | 0.63 | 0.37 | 0.12 | 0.09 | 0.24 |
|                                 | Nup58-like       | UN044794       | 15.68 | 21.21 | 24.39  | 11.87 | 7.85  | 4.90  | 1.59  | 0.80 | 2.23  | 1.47 | 1.37 | 0.53 | 0.58 | 0.49 | 0.52 | 0.34 |
|                                 | Nup58-like       | UN057197       | 0.51  | 0.16  | 0.00   | 0.00  | 0.00  | 0.00  | 0.00  | 0.05 | 0.24  | 0.17 | 0    | 0    | 0    | 0    | 0    | 0.09 |
| Inner-ring Nups                 | Nup155-like      | UN039075       | 18.48 | 17.15 | 22.49  | 14.83 | 6.99  | 4.59  | 1.69  | 0.69 | 0.93  | 0.29 | 1.04 | 0.82 | 0.47 | 0.53 | 0.16 | 0.13 |
|                                 | Nup155-like      | UN039076       | 18.98 | 17.68 | 23.16  | 15.06 | 7.11  | 4.70  | 1.75  | 0.71 | 0.90  | 0.35 | 1    | 0.92 | 0.48 | 0.54 | 0.19 | 0.11 |
|                                 | Nup155-like      | UN044744       | 10.79 | 15.56 | 14.96  | 11.14 | 5.33  | 3.47  | 1.48  | 0.33 | 1.25  | 1.52 | 1.97 | 0.25 | 0.75 | 1.29 | 0.64 | 0.14 |
|                                 | Nup188-like      | UN044117       | 9.07  | 17.40 | 23.24  | 14.73 | 9.12  | 6.37  | 3.93  | 1.90 | 0.71  | 0.96 | 1.83 | 1.06 | 0.88 | 0.55 | 0.72 | 0.04 |
|                                 | Nup188-like      | UN049566       | 14.20 | 15.44 | 18.75  | 11.12 | 6.75  | 4.39  | 2.38  | 1.05 | 0.56  | 0.57 | 0.3  | 0.25 | 0.42 | 0.34 | 0.25 | 0.05 |
|                                 | Nup188-like      | UN049567       | 13.89 | 14.82 | 17.90  | 10.55 | 6.51  | 4.20  | 2.30  | 1.05 | 0.63  | 0.72 | 0.47 | 0.26 | 0.33 | 0.36 | 0.18 | 0.05 |
| Nuclear Basket                  | Nup153-like      | UN065879       | 5.58  | 3.63  | 5.48   | 4.27  | 2.98  | 2.61  | 1.71  | 1.16 | 0.36  | 0.11 | 0.41 | 0.26 | 0.29 | 0.05 | 0.05 | 0.16 |
|                                 | Tpr              | UN044650       | 24.27 | 10.41 | 16.16  | 6.88  | 4.46  | 3.25  | 1.54  | 0.63 | 1.30  | 0.42 | 0.42 | 0.57 | 0.32 | 0.24 | 0.24 | 0.2  |
|                                 | Rae1             | UN003227       | 40.25 | 67.16 | 127.77 | 58.24 | 40.04 | 27.24 | 16.87 | 6.31 | 2.78  | 2.74 | 2.04 | 2.83 | 2.37 | 1.84 | 1.14 | 0.89 |
|                                 | Rae1             | UN070808       | 30.18 | 84.66 | 156.53 | 82.16 | 51.82 | 33.44 | 23.14 | 9.64 | 3.27  | 0.63 | 3.65 | 5.98 | 4.92 | 1.61 | 0.61 | 0.95 |
|                                 | Nup50-like       | UN007020       | 39.07 | 38.53 | 75.39  | 39.72 | 27.72 | 19.82 | 7.58  | 2.81 | 2.55  | 2.25 | 2.33 | 2.68 | 0.41 | 0.5  | 0.39 | 0.24 |
| Outer-ring Nups                 | Nup160-like      | UN022888       | 12.42 | 24.40 | 35.75  | 19.73 | 11.61 | 7.59  | 4.76  | 1.80 | 0.50  | 0.76 | 0.36 | 0.55 | 1.35 | 1.23 | 0.46 | 0.12 |
|                                 | Nup160-like      | UN024938       | 19.27 | 22.73 | 30.61  | 15.48 | 11.12 | 7.14  | 3.81  | 1.28 | 1.69  | 0.96 | 0.69 | 0.34 | 0.52 | 0.82 | 0.12 | 0.13 |
|                                 | Nup160-like      | UN049466       | 6.12  | 12.06 | 15.37  | 8.94  | 4.84  | 4.01  | 2.32  | 0.91 | 0.57  | 0.98 | 1.3  | 1.35 | 0.51 | 0.94 | 0.35 | 0.24 |
|                                 | Nup43-like       | UN067119       | 51.08 | 98.54 | 120.88 | 71.55 | 43.65 | 32.40 | 13.75 | 5.51 | 1.55  | 0.28 | 0.9  | 4.37 | 0.67 | 1.7  | 0.65 | 0.33 |
| Outer-ring Nups/central FG-Nups | Nup98-Nup96-like | UN064454       | 7.91  | 5.12  | 4.98   | 4.01  | 2.23  | 1.63  | 1.46  | 0.93 | 1.10  | 0.13 | 0.54 | 0.69 | 0.55 | 0.41 | 0.34 | 0.32 |
|                                 | Nup98-Nup96-like | UN064455       | 7.65  | 4.79  | 5.04   | 4.04  | 2.67  | 1.90  | 1.80  | 1.25 | 1.13  | 0.22 | 0.37 | 0.54 | 0.56 | 0.34 | 0.28 | 0.43 |
|                                 | Nup98-Nup96-like | UN068053       | 8.62  | 4.40  | 4.45   | 3.32  | 1.88  | 1.28  | 0.94  | 0.64 | 0.35  | 0.28 | 0.31 | 0.25 | 0.36 | 0.21 | 0.04 | 0.07 |
|                                 | Nup98-Nup96-like | UN068054       | 6.34  | 3.49  | 3.67   | 2.75  | 1.74  | 1.30  | 0.76  | 0.67 | 0.29  | 0.32 | 0.34 | 0.21 | 0.29 | 0.17 | 0.08 | 0.05 |
|                                 | Nup98-Nup96-like | UN068453       | 6.34  | 4.93  | 4.20   | 3.42  | 1.89  | 0.90  | 0.65  | 0.52 | 0.67  | 0.29 | 0.42 | 0.24 | 0.28 | 0.12 | 0.04 | 0.19 |
|                                 | Nup98-Nup96-like | UN070747       | 8.48  | 4.79  | 2.92   | 2.88  | 1.51  | 1.41  | 0.35  | 0.60 | 1.13  | 0.17 | 0.55 | 0.5  | 0.34 | 0.48 | 0.26 | 0.36 |
| Transmembrane Nups              | NDC1-like        | UN021885       | 19.03 | 28.18 | 29.89  | 21.14 | 10.40 | 9.73  | 2.58  | 1.04 | 0.99  | 2.24 | 0.85 | 2.92 | 0.72 | 0.18 | 0.68 | 0.16 |
|                                 | GLE1-like        | UN047960       | 14.51 | 13.57 | 18.14  | 10.08 | 6.66  | 5.18  | 2.08  | 1.15 | 0.88  | 1.30 | 0.73 | 1.11 | 0.42 | 0.37 | 0.21 | 0.13 |
|                                 | Nup53-like       | UN006036       | 0.78  | 0.89  | 1.14   | 1.46  | 0.80  | 0.59  | 0.37  | 0.23 | 0.41  | 0.24 | 0.26 | 0.48 | 0.21 | 0.25 | 0.14 | 0.21 |
|                                 | Nup53-like       | UN006037       | 1.41  | 1.24  | 1.75   | 2.33  | 0.93  | 0.77  | 0.46  | 0.31 | 0.55  | 0.28 | 0.44 | 0.71 | 0.24 | 0.54 | 0.12 | 0.3  |
|                                 | Nup53-like       | UN021120       | 21.08 | 27.91 | 35.91  | 27.92 | 17.15 | 13.11 | 5.30  | 2.41 | 0.78  | 1.16 | 0.71 | 2.7  | 0.31 | 0.41 | 0.37 | 0.06 |
|                                 | Nup53-like       | UN056272       | 0.00  | 0.09  | 0.02   | 0.28  | 0.04  | 0.07  | 0.07  | 0.14 | 0.00  | 0.16 | 0.04 | 0.12 | 0.08 | 0.12 | 0.12 | 0.15 |
|                                 | Nup85-like       | UN045474       | 6.82  | 13.45 | 13.03  | 13.42 | 7.21  | 5.47  | 3.48  | 1.92 | 0.05  | 2.33 | 1.75 | 0.67 | 1.03 | 0.48 | 0.68 | 0.49 |
|                                 | Nup85-like       | UN049654       | 10.30 | 18.79 | 17.88  | 13.02 | 6.83  | 5.24  | 2.24  | 0.91 | 0.45  | 1.45 | 0.81 | 0.39 | 0.55 | 0.25 | 0.38 | 0.18 |
|                                 | Nup85-like       | UN056742       | 0.00  | 0.00  | 0.03   | 0.09  | 0.27  | 0.20  | 0.16  | 0.07 | 0.00  | 0.00 | 0.06 | 0.1  | 0.32 | 0.18 | 0.27 | 0.12 |

\* Grey color indicates unigenes with expression level less than 5 RPKM at all time points

**Table S14.mRNA expression levels of T. ni homologs associated with the TREX (transcription-export) pathway.**

| Complex / Category | Gene*         | T. ni Ortholog | RPKM   |         |        |        |        |        |       |       | STDEV |       |       |       |      |      |      |      |
|--------------------|---------------|----------------|--------|---------|--------|--------|--------|--------|-------|-------|-------|-------|-------|-------|------|------|------|------|
|                    |               |                | C      | 0       | 6      | 12     | 18     | 24     | 36    | 48    | C     | 0     | 6     | 12    | 18   | 24   | 36   | 48   |
| TREX               | ALYREF        | UN063917       | 73.16  | 104.20  | 84.45  | 29.36  | 21.57  | 18.76  | 10.40 | 3.93  | 1.44  | 1.35  | 1.32  | 2.27  | 0.83 | 0.44 | 1.15 | 0.77 |
|                    | ALYREF        | UN063918       | 126.26 | 184.81  | 126.38 | 45.28  | 30.94  | 25.88  | 14.05 | 5.09  | 2.14  | 2.65  | 2.23  | 4     | 1.93 | 1.21 | 1.56 | 1.07 |
|                    | DDX39A        | UN010528       | 44.22  | 32.27   | 43.85  | 27.76  | 17.83  | 16.79  | 8.33  | 3.64  | 1.71  | 2.47  | 1.26  | 0.21  | 0.6  | 0.14 | 0.4  | 0.5  |
|                    | DDX39A/DDX39B | UN007276       | 747.82 | 1152.22 | 820.10 | 397.81 | 207.42 | 167.57 | 75.34 | 32.20 | 13.35 | 22.60 | 28.44 | 22.14 | 4.87 | 4.72 | 3.65 | 1.03 |
|                    | DDX39A/DDX39B | UN007277       | 874.91 | 1309.79 | 872.07 | 412.38 | 217.71 | 176.33 | 79.09 | 33.50 | 14.43 | 35.92 | 31.2  | 23.32 | 4.32 | 6.08 | 3.08 | 1.73 |
|                    | DDX39A/DDX39B | UN017599       | 0.15   | 0.13    | 0.21   | 0.29   | 0.23   | 0.00   | 0.31  | 0.26  | 0.25  | 0.16  | 0.13  | 0.28  | 0.17 | 0    | 0.25 | 0.45 |
|                    | DDX39A/DDX39B | UN035530       | 167.98 | 304.23  | 383.19 | 221.89 | 118.84 | 93.41  | 37.78 | 14.57 | 3.60  | 2.77  | 6.56  | 9.85  | 4.73 | 1.13 | 0.96 | 0.16 |
|                    | DDX39A/DDX39B | UN063722       | 145.16 | 121.00  | 158.81 | 79.02  | 52.69  | 41.12  | 23.69 | 10.11 | 3.08  | 0.61  | 2.61  | 4.46  | 1.33 | 1.23 | 2.05 | 0.71 |
|                    | DDX39B        | UN070500       | 86.88  | 73.96   | 149.12 | 47.62  | 38.08  | 22.58  | 13.00 | 5.00  | 2.48  | 5.81  | 6.44  | 4.02  | 1.69 | 1.57 | 1.05 | 0.12 |
|                    | POLDIP3       | UN015446       | 25.28  | 29.10   | 39.08  | 27.33  | 16.74  | 11.83  | 5.63  | 2.55  | 1.23  | 2.94  | 3.06  | 0.92  | 1.23 | 0.44 | 0.47 | 0.12 |
|                    | POLDIP3       | UN015447       | 29.59  | 33.82   | 43.58  | 30.63  | 18.16  | 12.52  | 6.10  | 2.80  | 1.35  | 3.59  | 3.32  | 1.13  | 1.27 | 0.34 | 0.48 | 0.15 |
|                    | RBM39         | UN014629       | 47.85  | 52.33   | 46.55  | 19.18  | 13.79  | 9.50   | 5.65  | 2.91  | 1.99  | 2.19  | 1.77  | 0.77  | 0.35 | 0.78 | 0.19 | 0.15 |
|                    | RBM39         | UN014630       | 59.58  | 67.16   | 57.42  | 23.69  | 17.27  | 11.75  | 7.14  | 3.60  | 2.57  | 2.66  | 1.96  | 1.04  | 0.24 | 0.97 | 0.4  | 0.18 |
|                    | RBM39         | UN014631       | 21.95  | 34.32   | 28.93  | 12.35  | 9.05   | 6.86   | 4.00  | 1.89  | 1.38  | 0.40  | 0.85  | 0.54  | 0.7  | 0.23 | 0.69 | 0.2  |
|                    | RBM39         | UN017155       | 0.21   | 0.22    | 0.26   | 0.46   | 0.27   | 0.26   | 0.52  | 0.39  | 0.36  | 0.19  | 0.27  | 0.24  | 0.26 | 0.06 | 0.24 | 0.14 |
|                    | RBM39         | UN021342       | 0.24   | 0.22    | 0.25   | 0.29   | 0.36   | 0.35   | 0.46  | 0.50  | 0.12  | 0.21  | 0.06  | 0.11  | 0.17 | 0.06 | 0.09 | 0.15 |
|                    | SARNP         | UN006330       | 29.06  | 25.84   | 50.93  | 25.74  | 16.71  | 14.88  | 6.12  | 2.24  | 0.40  | 1.79  | 0.55  | 1.54  | 0.57 | 1.16 | 1.05 | 0.24 |
|                    | SARNP         | UN006331       | 29.84  | 26.51   | 52.37  | 26.36  | 17.14  | 15.23  | 6.26  | 2.31  | 0.41  | 1.87  | 0.61  | 1.55  | 0.6  | 1.21 | 1.07 | 0.27 |
|                    | Thoc 1        | UN027216       | 2.77   | 4.33    | 6.41   | 3.07   | 2.23   | 1.39   | 0.78  | 0.30  | 0.36  | 0.61  | 1.06  | 0.15  | 0.47 | 0.36 | 0.15 | 0.19 |
|                    | Thoc 1        | UN027217       | 31.18  | 28.59   | 31.94  | 13.13  | 10.64  | 8.07   | 4.25  | 2.14  | 3.80  | 0.63  | 2.79  | 0.88  | 0.86 | 0.33 | 0.38 | 0.78 |
|                    | Thoc 1        | UN027624       | 23.31  | 24.63   | 34.33  | 12.14  | 10.34  | 8.40   | 4.00  | 1.53  | 0.39  | 1.19  | 1.47  | 0.35  | 1.07 | 0.79 | 0.39 | 0.36 |
|                    | Thoc 2        | UN022316       | 30.92  | 31.68   | 25.17  | 9.72   | 6.92   | 4.17   | 2.28  | 1.05  | 0.10  | 1.54  | 0.73  | 0.63  | 0.31 | 0.23 | 0.16 | 0.33 |
|                    | Thoc 6        | UN035293       | 19.20  | 19.73   | 38.32  | 14.96  | 10.67  | 7.48   | 4.09  | 1.91  | 1.87  | 0.99  | 1.66  | 1.33  | 0.76 | 0.69 | 0.08 | 0.27 |
|                    | Thoc 6        | UN044917       | 9.53   | 13.27   | 24.21  | 7.91   | 6.05   | 4.30   | 2.43  | 0.84  | 1.11  | 1.05  | 1.71  | 0.47  | 0.78 | 0.55 | 0.51 | 0.34 |
|                    | Thoc 7        | UN014434       | 35.04  | 31.66   | 55.65  | 24.35  | 17.75  | 14.44  | 7.82  | 2.96  | 1.32  | 0.91  | 3.74  | 2.93  | 1.84 | 0.43 | 0.66 | 0.09 |
|                    | Thoc3         | UN004477       | 11.30  | 18.92   | 26.25  | 17.16  | 10.65  | 7.73   | 3.10  | 1.66  | 0.36  | 0.58  | 0.55  | 1.11  | 0.57 | 0.38 | 0.32 | 0.3  |
|                    | Thoc3         | UN004480       | 11.74  | 19.25   | 25.82  | 17.57  | 10.91  | 7.30   | 3.24  | 1.83  | 0.38  | 0.25  | 0.51  | 1.02  | 0.47 | 0.49 | 0.18 | 0.66 |
|                    | Thoc3         | UN004482       | 12.88  | 20.99   | 28.73  | 18.94  | 11.71  | 7.54   | 3.30  | 1.55  | 0.57  | 0.37  | 0.45  | 0.95  | 0.48 | 0.27 | 0.31 | 0.48 |
|                    | Thoc3         | UN004486       | 13.77  | 22.65   | 30.50  | 20.43  | 12.70  | 8.30   | 3.57  | 1.67  | 0.60  | 0.44  | 0.42  | 1.36  | 0.52 | 0.33 | 0.09 | 0.45 |
|                    | Thoc3         | UN048114       | 14.53  | 9.79    | 16.41  | 7.48   | 5.10   | 4.12   | 1.68  | 0.77  | 0.95  | 0.62  | 0.57  | 0.43  | 0.51 | 0.32 | 0.23 | 0.08 |
| ZC3H11A            | UN068727      | 0.73           | 0.99   | 1.99    | 1.02   | 0.76   | 1.02   | 0.55   | 0.29  | 0.21  | 0.37  | 0.48  | 0.26  | 0.27  | 0.66 | 0.04 | 0.15 |      |
| ZC3H11A            | UN068728      | 2.28           | 2.66   | 4.71    | 2.48   | 1.87   | 1.63   | 0.59   | 0.44  | 0.13  | 0.91  | 0.82  | 0.7   | 0.42  | 0.69 | 0.28 | 0.37 |      |
| ZC3H11A            | UN068729      | 0.78           | 1.42   | 3.99    | 2.31   | 1.70   | 1.33   | 0.87   | 0.36  | 0.23  | 0.35  | 0.64  | 0.52  | 0.42  | 0.72 | 0.45 | 0.18 |      |
| ZC3H11A            | UN068730      | 2.72           | 3.51   | 7.40    | 4.14   | 3.09   | 2.10   | 0.92   | 0.55  | 0.26  | 1.02  | 0.97  | 1     | 0.24  | 0.76 | 0.34 | 0.46 |      |

\* Grey color indicates unigenes with expression level less than 5 RPKM at all time points

**Table S15. mRNA expression levels of T. ni homologs associated with small RNA generating pathway.**

| Complex / Category     | Gene*    | T. ni<br>Ortholog | RPKM   |          |          |          |          |          |      |      | STDEV |      |      |      |      |      |      |      |
|------------------------|----------|-------------------|--------|----------|----------|----------|----------|----------|------|------|-------|------|------|------|------|------|------|------|
|                        |          |                   | C      | 0        | 6        | 12       | 18       | 24       | 36   | 48   | C     | 0    | 6    | 12   | 18   | 24   | 36   | 48   |
|                        |          |                   | Arg 1  | UN047527 | 17.57    | 18.98    | 22.74    | 10.39    | 7.29 | 4.17 | 1.75  | 1.05 | 1.41 | 0.68 | 0.78 | 0.68 | 0.3  | 0.67 |
| Arg 1                  | UN064364 | 12.06             | 18.35  | 15.97    | 9.15     | 4.78     | 3.15     | 1.39     | 0.83 | 1.26 | 1.35  | 1.09 | 0.8  | 0.73 | 0.81 | 0.42 | 0.28 |      |
| Arg 2                  | UN049184 | 198.60            | 166.57 | 131.04   | 50.79    | 33.46    | 22.60    | 14.73    | 7.44 | 5.41 | 4.89  | 2.07 | 0.59 | 1.29 | 0.7  | 0.84 | 0.33 |      |
| Arg 3 / Bm piwi        | UN063569 | 93.22             | 91.60  | 114.19   | 56.40    | 28.07    | 21.08    | 7.59     | 2.83 | 1.34 | 0.87  | 2.1  | 2.75 | 1.09 | 0.73 | 0.75 | 0.33 |      |
| Arg 3 / Bm piwi        | UN070631 | 4.50              | 3.12   | 4.00     | 2.81     | 1.73     | 1.24     | 0.79     | 0.52 | 0.29 | 0.16  | 0.29 | 0.25 | 0.06 | 0.15 | 0.06 | 0.17 |      |
| Arg 3 / Bm piwi        | UN070632 | 4.53              | 3.12   | 4.03     | 2.84     | 1.74     | 1.26     | 0.79     | 0.51 | 0.31 | 0.16  | 0.29 | 0.24 | 0.06 | 0.17 | 0.06 | 0.17 |      |
| Ago-Aub                | UN063569 | 93.22             | 91.60  | 114.19   | 56.40266 | 28.06745 | 21.0755  | 7.592289 | 2.83 | 1.34 | 0.87  | 2.1  | 2.75 | 1.09 | 0.73 | 0.75 | 0.33 |      |
| R2D2                   | UN034727 | 14.16             | 13.23  | 24.99    | 11.52686 | 5.58322  | 4.66343  | 1.687366 | 0.60 | 1.68 | 0.46  | 1.93 | 0.65 | 1.02 | 0.46 | 1.06 | 0.29 |      |
| R2D2                   | UN034726 | 8.01              | 6.80   | 13.98    | 6.6099   | 3.037442 | 2.599077 | 0.844967 | 0.35 | 0.87 | 0.19  | 1.23 | 0.43 | 0.43 | 0.38 | 0.58 | 0.21 |      |
| R3D1                   | UN069998 | 18.66             | 34.85  | 46.60    | 33.74212 | 16.90344 | 11.99221 | 5.476954 | 1.25 | 1.41 | 1.96  | 3.68 | 0.63 | 1.83 | 1.67 | 1.19 | 0.4  |      |
| R3D1                   | UN069997 | 13.71             | 25.80  | 31.52    | 23.38806 | 11.39307 | 8.326638 | 3.920268 | 0.94 | 0.76 | 1.12  | 2.1  | 0.09 | 1.01 | 1.54 | 0.74 | 0.26 |      |
| R3D1                   | UN069996 | 29.14             | 60.56  | 97.34    | 76.80119 | 41.49592 | 30.12166 | 14.54886 | 5.49 | 1.80 | 1.40  | 1.31 | 1.8  | 1.05 | 1.83 | 0.79 | 0.58 |      |
| R3D1                   | UN069995 | 27.11             | 56.43  | 89.97    | 71.23328 | 38.42907 | 27.97211 | 13.55114 | 5.15 | 1.53 | 1.21  | 1.1  | 1.85 | 0.87 | 1.78 | 0.71 | 0.49 |      |
| Drosha                 | UN066532 | 7.10              | 3.71   | 4.98     | 2.62483  | 1.444257 | 1.143077 | 0.45159  | 0.26 | 0.31 | 0.11  | 0.4  | 0.1  | 0.27 | 0.09 | 0.12 | 0.09 |      |
| Pasha                  | UN010331 | 2.05              | 0.66   | 1.17     | 0.40     | 0.36     | 0.25     | 0.15     | 0.03 | 0.28 | 0.25  | 0.17 | 0.09 | 0.19 | 0.13 | 0.16 | 0.03 |      |
| Pasha                  | UN010332 | 1.99              | 0.61   | 1.08     | 0.44     | 0.41     | 0.25     | 0.22     | 0.05 | 0.32 | 0.23  | 0.08 | 0.1  | 0.16 | 0.16 | 0.13 | 0.04 |      |
| Pasha                  | UN011902 | 1.35              | 0.71   | 1.46     | 0.55     | 0.60     | 0.37     | 0.21     | 0.14 | 0.24 | 0.22  | 0.19 | 0.14 | 0.16 | 0.19 | 0.04 | 0.05 |      |
| Pasha                  | UN011903 | 1.34              | 0.54   | 1.46     | 0.61     | 0.60     | 0.45     | 0.23     | 0.17 | 0.22 | 0.27  | 0.18 | 0.15 | 0.19 | 0.23 | 0.05 | 0.15 |      |
| Dicer-1                | UN008847 | 4.29              | 1.02   | 1.32     | 0.73     | 0.42     | 0.53     | 0.32     | 0.20 | 0.42 | 0.05  | 0.13 | 0.09 | 0.11 | 0.12 | 0.09 | 0.12 |      |
| Dicer-1                | UN008848 | 2.39              | 0.90   | 1.11     | 0.58     | 0.46     | 0.32     | 0.21     | 0.23 | 0.55 | 0.23  | 0.14 | 0.25 | 0.33 | 0.08 | 0.16 | 0.2  |      |
| Dicer-2                | UN036750 | 0.36              | 0.09   | 0.03     | 0.05     | 0.06     | 0.48     | 0.48     | 0.07 | 0.31 | 0.15  | 0.06 | 0.09 | 0.13 | 0.2  | 0.49 | 0.12 |      |
| Dicer-2                | UN048573 | 0.21              | 0.09   | 0.00     | 0.06     | 0.24     | 0.27     | 0.16     | 0.17 | 0.36 | 0.08  | 0    | 0.13 | 0.17 | 0.07 | 0.14 | 0.15 |      |
| Dicer-2                | UN066277 | 104.89            | 40.75  | 28.79    | 8.76     | 5.02     | 3.55     | 2.62     | 1.46 | 1.77 | 2.21  | 0.76 | 0.43 | 0.35 | 0.33 | 0.14 | 0.21 |      |
| Dicer-2                | UN066287 | 107.23            | 41.61  | 29.68    | 8.98     | 5.16     | 3.69     | 2.68     | 1.49 | 1.83 | 2.19  | 0.73 | 0.47 | 0.42 | 0.33 | 0.13 | 0.19 |      |
| endoribonuclease Dcr-1 | UN068521 | 3.71              | 0.83   | 1.28     | 0.66     | 0.46     | 0.51     | 0.28     | 0.19 | 0.35 | 0.16  | 0.2  | 0.12 | 0.17 | 0.06 | 0.11 | 0.13 |      |
| endoribonuclease Dcr-1 | UN068522 | 4.75              | 0.67   | 1.06     | 0.51     | 0.43     | 0.43     | 0.27     | 0.18 | 0.42 | 0.10  | 0.21 | 0.12 | 0.13 | 0.03 | 0.11 | 0.16 |      |

\* Grey color indicates unigenes with expression level less than 5 RPKM at all time points





|            |                               |          |         |         |         |         |         |         |        |        |       |        |       |       |      |       |       |       |
|------------|-------------------------------|----------|---------|---------|---------|---------|---------|---------|--------|--------|-------|--------|-------|-------|------|-------|-------|-------|
| hsp family | hsp60                         | UN014211 | 0.56    | 0.68    | 0.46    | 0.28    | 0.36    | 0.26    | 0.23   | 0.23   | 0.24  | 0.21   | 0.13  | 0.16  | 0.07 | 0.06  | 0.02  | 0.05  |
|            | hsp60                         | UN015254 | 628.12  | 684.35  | 701.64  | 280.20  | 179.61  | 148.18  | 62.30  | 19.82  | 20.32 | 14.94  | 12.4  | 20.33 | 1.57 | 2.5   | 2.7   | 0.70  |
|            | hsp70                         | UN000527 | 151.19  | 168.50  | 125.86  | 83.77   | 50.23   | 34.16   | 17.94  | 8.43   | 5.44  | 9.86   | 4.08  | 1.98  | 0.73 | 2.65  | 1.78  | 0.33  |
|            | hsp70                         | UN001769 | 27.55   | 3.03    | 7.05    | 13.83   | 40.66   | 5.05    | 19.10  | 6.04   | 3.72  | 0.3    | 1.05  | 0.9   | 1.73 | 1.08  | 3.47  | 0.58  |
|            | hsp70                         | UN001910 | 28.15   | 4.19    | 9.25    | 19.76   | 52.31   | 7.17    | 22.03  | 9.04   | 2.39  | 0.22   | 0.2   | 1.96  | 0.77 | 0.62  | 0.98  | 1.03  |
|            | hsp70                         | UN002604 | 4.58    | 0.32    | 0.47    | 2.35    | 6.10    | 1.28    | 3.20   | 1.86   | 0.14  | 0.07   | 0.18  | 0.21  | 0.55 | 0.06  | 0.08  | 0.08  |
|            | hsp70                         | UN002605 | 4.80    | 0.30    | 0.47    | 2.39    | 6.13    | 1.29    | 3.29   | 1.93   | 0.25  | 0.04   | 0.18  | 0.2   | 0.53 | 0.04  | 0.07  | 0.04  |
|            | hsp70                         | UN025820 | 0.22    | 0.31    | 0.13    | 0.36    | 0.43    | 0.36    | 0.23   | 0.19   | 0.13  | 0.17   | 0.07  | 0.1   | 0.2  | 0.34  | 0.18  | 0.07  |
|            | hsp70                         | UN033115 | 0.13    | 0.22    | 0.09    | 0.44    | 0.34    | 0.26    | 0.47   | 0.11   | 0.22  | 0.2    | 0.11  | 0.24  | 0.3  | 0.07  | 0.41  | 0.20  |
|            | hsp70                         | UN033766 | 0.08    | 0.18    | 0.10    | 0.41    | 0.03    | 0.32    | 0.30   | 0.13   | 0.14  | 0.17   | 0.12  | 0.13  | 0.06 | 0.39  | 0.1   | 0.11  |
|            | hsp70                         | UN045506 | 7.70    | 0.98    | 1.18    | 2.16    | 6.51    | 0.78    | 3.16   | 0.76   | 1.02  | 0.66   | 0.35  | 0.45  | 1.91 | 0.51  | 0.94  | 0.66  |
|            | hsp70                         | UN049959 | 308.75  | 317.56  | 185.89  | 79.55   | 49.11   | 32.01   | 15.03  | 5.16   | 8.69  | 3.12   | 5.91  | 4.46  | 3.36 | 3.69  | 1.63  | 0.23  |
|            | hsp70                         | UN059101 | 4220.74 | 6035.30 | 3956.62 | 3208.57 | 1995.66 | 1249.91 | 702.51 | 265.29 | 50.53 | 113.26 | 34    | 85.52 | 6.95 | 30.06 | 24.69 | 15.41 |
|            | hsp70                         | UN060321 | 0.00    | 0.00    | 0.07    | 0.16    | 0.05    | 0.25    | 0.20   | 0.12   | 0     | 0      | 0.13  | 0.31  | 0.09 | 0.22  | 0.18  | 0.20  |
|            | hsp70-2                       | UN016518 | 674.30  | 565.26  | 436.90  | 276.77  | 193.91  | 139.11  | 53.29  | 21.88  | 19.61 | 10.79  | 7.62  | 8.5   | 4.73 | 2.5   | 0.57  | 1.18  |
|            | hsp90                         | UN009070 | 1070.57 | 893.61  | 1044.44 | 745.83  | 522.85  | 219.35  | 100.09 | 28.23  | 19.09 | 24.61  | 23.75 | 23.77 | 9.24 | 6.35  | 6.86  | 2.16  |
|            | hsp90 35140899 miss su        | UN046602 | 161.68  | 170.81  | 193.25  | 190.24  | 112.68  | 62.10   | 34.72  | 13.25  | 6.48  | 6.69   | 18.83 | 10.02 | 1.9  | 1.47  | 1.65  | 1.05  |
|            | small heat shock protein 19.7 | UN063826 | 17.85   | 0.59    | 1.32    | 6.56    | 11.83   | 3.10    | 6.58   | 2.27   | 1.2   | 0.18   | 0.43  | 0.81  | 0.42 | 0.9   | 0.77  | 0.50  |
|            | small heat shock protein 22.2 | UN062469 | 10.41   | 1.60    | 1.71    | 8.14    | 12.63   | 2.95    | 9.13   | 5.02   | 1.32  | 0.53   | 0.6   | 0.98  | 1.04 | 0.62  | 2.05  | 0.87  |
|            | small heat shock protein 22.2 | UN064082 | 12.71   | 1.93    | 1.29    | 6.94    | 11.57   | 2.41    | 8.54   | 4.15   | 1.08  | 0.41   | 0.11  | 0.88  | 1.17 | 0.66  | 1.1   | 1.40  |
|            | small heat shock protien      | UN002579 | 7.15    | 0.09    | 0.60    | 1.82    | 2.56    | 0.75    | 1.72   | 0.25   | 0.54  | 0.1    | 0.22  | 0.37  | 0.97 | 0.24  | 0.29  | 0.22  |
|            | small heat shock protien      | UN023968 | 259.74  | 442.90  | 268.46  | 81.91   | 36.19   | 25.98   | 11.06  | 7.53   | 6.46  | 9.93   | 4.92  | 4.38  | 3.24 | 2.41  | 0.45  | 1.21  |
|            | small heat shock protien      | UN026941 | 0.83    | 0.04    | 0.25    | 0.19    | 0.38    | 0.25    | 0.28   | 0.00   | 0.39  | 0.07   | 0.05  | 0.13  | 0.19 | 0.28  | 0.27  | 0.00  |
|            | small heat shock protien      | UN029422 | 14.76   | 7.57    | 11.93   | 25.52   | 30.71   | 5.88    | 14.53  | 4.14   | 2.74  | 0.71   | 0.98  | 1.66  | 1.76 | 0.13  | 1.87  | 1.16  |
|            | small heat shock protien      | UN047293 | 22.97   | 37.78   | 20.78   | 7.08    | 2.70    | 2.06    | 1.50   | 1.48   | 0.84  | 1.34   | 2.39  | 0.8   | 0.5  | 0.33  | 0.27  | 0.15  |
|            | small heat shock protien      | UN054228 | 16.63   | 14.93   | 13.47   | 5.21    | 4.53    | 2.76    | 2.24   | 0.94   | 2.54  | 1.53   | 0.94  | 0.47  | 0.28 | 0.39  | 0.31  | 0.39  |

\* Grey color indicates unigenes with expression level less than 5 RPKM at all time points

**Table S17. mRNA expression levels of T. ni homologs associated with ROS (Response to Oxidative Stress).**

| Complex / Category                 | Gene*                         | T. ni Ortholog | RPKM   |        |        |          |          |          |          |       |      | STDEV |      |      |      |      |      |      |  |  |
|------------------------------------|-------------------------------|----------------|--------|--------|--------|----------|----------|----------|----------|-------|------|-------|------|------|------|------|------|------|--|--|
|                                    |                               |                | C      | 0      | 6      | 12       | 18       | 24       | 36       | 48    | C    | 0     | 6    | 12   | 18   | 24   | 36   | 48   |  |  |
| Response to Oxidative Stress (ROS) | Catalase (Cat)                | UN006553       | 135.55 | 108.35 | 72.13  | 28.82    | 19.29    | 13.33    | 7.16     | 4.44  | 3.68 | 1.95  | 1.44 | 1.16 | 0.82 | 0.61 | 0.64 | 0.22 |  |  |
|                                    | Superoxide dismutase (Sod)    | UN067329       | 101.06 | 111.65 | 126.34 | 87.58416 | 55.20862 | 44.28785 | 22.36421 | 5.53  | 7.09 | 1.43  | 4.95 | 2.88 | 3.39 | 0.62 | 2.01 | 0.56 |  |  |
|                                    | Superoxide dismutase (Sod)    | UN059002       | 7.39   | 4.41   | 5.77   | 8.93535  | 12.87558 | 5.757411 | 7.750131 | 3.96  | 1.68 | 0.94  | 0.92 | 0.62 | 0.8  | 0.26 | 0.55 | 0.64 |  |  |
|                                    | Superoxide dismutase (Sod)    | UN059001       | 7.32   | 4.40   | 6.98   | 12.92635 | 18.04469 | 8.091656 | 11.83632 | 5.56  | 1.60 | 0.48  | 0.62 | 1.11 | 0.76 | 0.19 | 1.8  | 0.72 |  |  |
|                                    | Superoxide dismutase 2 (Mn)   | UN064375       | 61.82  | 82.30  | 134.99 | 75.88046 | 50.83795 | 37.82841 | 18.74022 | 4.91  | 5.06 | 2.40  | 2.26 | 3.57 | 1.9  | 2.68 | 2.01 | 0.5  |  |  |
|                                    | oxidative stress responsive 1 | UN023676       | 20.24  | 29.26  | 28.37  | 14.92765 | 9.418093 | 6.75948  | 2.89714  | 1.54  | 0.76 | 0.96  | 0.21 | 0.8  | 0.34 | 0.15 | 0.18 | 0.04 |  |  |
|                                    | oxidative stress responsive 1 | UN005844       | 2.11   | 1.63   | 2.60   | 1.37     | 0.87     | 0.74     | 0.33     | 0.10  | 0.25 | 0.23  | 0.27 | 0.06 | 0.14 | 0.19 | 0.11 | 0.05 |  |  |
|                                    | Glutathione peroxidase (Gpx)  | UN034134       | 31.61  | 41.25  | 42.42  | 28.39655 | 21.83728 | 23.76671 | 11.70197 | 4.52  | 1.07 | 0.89  | 0.49 | 1.26 | 0.47 | 1.24 | 0.97 | 0.39 |  |  |
|                                    | Glutathione peroxidase (Gpx)  | UN034135       | 125.94 | 152.80 | 168.75 | 114.4644 | 89.22505 | 98.43038 | 48.79471 | 18.80 | 4.87 | 2.96  | 0.88 | 5.51 | 1.48 | 7.51 | 3.73 | 1.43 |  |  |
|                                    | Glutathione peroxidase (Gpx)  | UN056254       | 4.03   | 15.71  | 18.49  | 13.12899 | 7.506068 | 4.165343 | 2.437845 | 1.05  | 0.12 | 0.50  | 0.83 | 0.48 | 0.43 | 0.29 | 0.29 | 0.21 |  |  |
|                                    | Glutathione peroxidase (Gpx)  | UN056255       | 4.18   | 16.33  | 19.13  | 13.4623  | 7.714708 | 4.236106 | 2.48764  | 1.07  | 0.15 | 0.56  | 0.73 | 0.48 | 0.51 | 0.25 | 0.27 | 0.24 |  |  |
|                                    | Glutathione peroxidase (Gpx)  | UN070028       | 3.26   | 1.74   | 3.34   | 2.564754 | 1.800751 | 1.699263 | 1.103247 | 0.64  | 0.23 | 0.33  | 0.32 | 0.36 | 0.26 | 0.13 | 0.16 | 0.18 |  |  |
|                                    | Cytochrome P-450              | UN034682       | 4.01   | 2.07   | 2.86   | 1.872326 | 1.189273 | 1.051006 | 0.772079 | 0.36  | 0.39 | 0.13  | 0.27 | 0.31 | 0.12 | 0.31 | 0.21 | 0.14 |  |  |
|                                    | Cytochrome P-450              | UN034680       | 12.32  | 7.51   | 6.78   | 3.744029 | 2.645622 | 1.994642 | 1.289785 | 0.61  | 0.46 | 0.15  | 0.55 | 0.42 | 0.31 | 0.23 | 0.24 | 0.07 |  |  |
|                                    | Cytochrome P-450              | UN024318       | 1.21   | 0.08   | 0.11   | 0.021262 | 0.031966 | 0.024853 | 0.033447 | 0.02  | 0.49 | 0.02  | 0.05 | 0.02 | 0.04 | 0.04 | 0.06 | 0.03 |  |  |
|                                    | Cytochrome P-450              | UN016751       | 3.95   | 0.17   | 0.30   | 0.17     | 0.06     | 0.00     | 0.03     | 0.01  | 0.21 | 0.09  | 0.12 | 0.04 | 0.07 | 0    | 0.04 | 0.02 |  |  |

\* Grey color indicates unigenes with expression level less than 5 RPKM at all time points

**Table S18. mRNA expression levels of T. ni homologs associated with NFkB-IkB (Nuclear Factor kB- and I kB).**

| Complex / Category | Gene*                               | T. ni Ortholog | RPKM  |       |       |       |       |      |      |      | STDEV |      |      |      |      |      |      |      |
|--------------------|-------------------------------------|----------------|-------|-------|-------|-------|-------|------|------|------|-------|------|------|------|------|------|------|------|
|                    |                                     |                | C     | 0     | 6     | 12    | 18    | 24   | 36   | 48   | C     | 0    | 6    | 12   | 18   | 24   | 36   | 48   |
| IkB family         | IkBa/IkBβ/IkBε/IkBγ                 | UN043702       | 35.57 | 21.62 | 24.12 | 14.42 | 10.14 | 7.94 | 3.72 | 2.70 | 2.19  | 0.84 | 1    | 1.89 | 1.38 | 1.32 | 1.34 | 0.18 |
|                    | NF-kB1 (p105/p50)/NF-kB2 (p100/p52) | UN022266       | 75.35 | 36.64 | 30.78 | 15.91 | 8.72  | 6.29 | 2.68 | 1.19 | 6.65  | 1.54 | 1.22 | 0.91 | 1.47 | 0.33 | 0.68 | 0.06 |
| NFkB family        | p65/RelB/c-Rel                      | UN058651       | 16.87 | 13.36 | 12.05 | 8.75  | 5.23  | 3.66 | 2.46 | 1.19 | 0.46  | 0.84 | 0.66 | 0.17 | 0.74 | 0.37 | 0.26 | 0.13 |
|                    | p65/RelB/c-Rel                      | UN058652       | 15.67 | 11.04 | 8.92  | 6.36  | 3.76  | 2.43 | 1.74 | 0.95 | 0.68  | 0.64 | 0.62 | 0.34 | 0.4  | 0.38 | 0.09 | 0.07 |
| IKK complex        | Ikkα/IKKβ                           | UN065352       | 8.05  | 4.75  | 5.91  | 2.45  | 1.69  | 1.41 | 0.57 | 0.34 | 0.23  | 0.53 | 0.49 | 0.14 | 0.2  | 0.1  | 0.09 | 0.15 |
|                    | NEMO (IKKγ)                         | UN000226       | 14.61 | 3.82  | 3.34  | 2.05  | 1.14  | 1.03 | 0.25 | 0.39 | 0.30  | 0.47 | 0.63 | 0.3  | 0.16 | 0.3  | 0.13 | 0.07 |
|                    | NEMO (IKKγ)                         | UN068267       | 15.98 | 4.27  | 3.54  | 2.27  | 1.32  | 1.07 | 0.27 | 0.44 | 0.35  | 0.48 | 0.77 | 0.3  | 0.24 | 0.27 | 0.14 | 0.12 |
|                    | NEMO (IKKγ)                         | UN068268       | 17.11 | 4.43  | 3.69  | 2.26  | 1.33  | 1.14 | 0.30 | 0.45 | 0.49  | 0.56 | 0.75 | 0.33 | 0.23 | 0.32 | 0.15 | 0.09 |

\* Grey color indicates unigenes with expression level less than 5 RPKM at all time points

Abbreviation: Bcl-3, B-cell lymphoma 3 protein, Dif, dorsal-related immunity factor, Ird5, immune response deficient protein 5, IkB, inhibitor of NF-kappa-B, IKK, IkB kinase, NEMO, NF-kappa-B essential modulator, NFkB, nuclear factor kappa B.



|                                      |          |        |        |        |        |       |       |       |      |      |      |       |      |      |      |      |      |
|--------------------------------------|----------|--------|--------|--------|--------|-------|-------|-------|------|------|------|-------|------|------|------|------|------|
| LPR2                                 | UN005188 | 66.88  | 39.04  | 5.39   | 4.94   | 3.62  | 5.58  | 3.56  | 1.90 | 1.33 | 0.61 | 0.25  | 0.18 | 0.11 | 0.31 | 0.31 | 0.09 |
| LPR2                                 | UN005189 | 63.63  | 38.20  | 5.79   | 5.07   | 3.50  | 5.34  | 3.46  | 1.87 | 0.43 | 0.37 | 0.24  | 0.3  | 0.29 | 0.35 | 0.41 | 0.05 |
| NFAT                                 | UN067086 | 11.96  | 3.61   | 1.88   | 1.19   | 0.86  | 0.80  | 0.23  | 0.18 | 0.46 | 0.30 | 0.25  | 0.2  | 0.22 | 0.25 | 0.05 | 0.06 |
| NFAT                                 | UN068064 | 9.90   | 4.45   | 2.34   | 2.01   | 1.19  | 1.03  | 0.58  | 0.43 | 0.29 | 0.67 | 0.25  | 0.54 | 0.41 | 0.14 | 0.36 | 0.13 |
| PELLE                                | UN035304 | 24.66  | 31.58  | 24.12  | 17.03  | 10.07 | 5.69  | 3.03  | 1.43 | 0.62 | 0.56 | 1.09  | 0.56 | 0.4  | 0.43 | 0.31 | 0.07 |
| PELLE                                | UN035305 | 24.09  | 31.97  | 23.59  | 16.90  | 9.95  | 5.70  | 2.88  | 1.49 | 0.38 | 1.33 | 1.75  | 0.69 | 0.49 | 0.5  | 0.5  | 0.18 |
| PELLINO                              | UN040918 | 15.80  | 23.72  | 14.82  | 11.59  | 7.22  | 6.20  | 4.47  | 3.73 | 0.44 | 1.17 | 0.45  | 0.49 | 0.56 | 0.96 | 0.31 | 0.36 |
| PGRP-SA/PGRP-SC2/PRGP-SC1A/PRGP-SC1B | UN007389 | 2.78   | 0.95   | 1.76   | 0.54   | 0.34  | 0.07  | 0.05  | 0.04 | 0.46 | 0.16 | 0.22  | 0.06 | 0.2  | 0.12 | 0.08 | 0.07 |
| PGRP-SA/PGRP-SC2/PRGP-SC1A/PRGP-SC1B | UN014065 | 1.28   | 1.06   | 0.80   | 0.44   | 0.37  | 0.10  | 0.00  | 0.11 | 0.89 | 0.26 | 0.49  | 0.18 | 0.29 | 0.09 | 0    | 0.15 |
| PGRP-SA/PGRP-SC2/PRGP-SC1A/PRGP-SC1B | UN014066 | 1.24   | 1.09   | 0.76   | 0.35   | 0.37  | 0.08  | 0.00  | 0.13 | 0.8  | 0.29 | 0.52  | 0.1  | 0.27 | 0.08 | 0    | 0.16 |
| POSH                                 | UN063975 | 13.98  | 11.84  | 7.55   | 4.43   | 2.21  | 1.92  | 1.29  | 0.67 | 1.01 | 0.67 | 0.65  | 0.5  | 0.38 | 0.24 | 0.15 | 0.21 |
| POSH                                 | UN063976 | 12.43  | 9.56   | 5.52   | 3.25   | 1.54  | 1.52  | 1.00  | 0.44 | 1.8  | 0.72 | 0.65  | 0.15 | 0.26 | 0.26 | 0.34 | 0.23 |
| SERPIN-27A                           | UN032437 | 30.80  | 31.30  | 28.67  | 11.12  | 5.49  | 5.13  | 2.61  | 0.69 | 2.34 | 0.87 | 0.63  | 0.7  | 0.43 | 0.17 | 0.09 | 0.18 |
| SKPA                                 | UN059632 | 72.56  | 70.36  | 124.69 | 67.53  | 53.17 | 40.52 | 15.94 | 5.00 | 5.64 | 2.07 | 4     | 6.17 | 2.22 | 2.63 | 1.95 | 0.68 |
| SPN4                                 | UN067625 | 93.52  | 103.25 | 105.01 | 41.43  | 23.35 | 18.33 | 8.62  | 3.44 | 2.72 | 6.76 | 1.62  | 2.31 | 1.21 | 0.74 | 0.64 | 0.21 |
| SPN4                                 | UN067626 | 102.46 | 110.67 | 113.81 | 44.69  | 25.26 | 19.81 | 9.38  | 3.70 | 2.75 | 6.54 | 2.33  | 2.87 | 1.32 | 0.76 | 0.7  | 0.24 |
| SPN4                                 | UN067627 | 104.69 | 118.11 | 119.09 | 47.16  | 26.37 | 20.82 | 9.77  | 3.87 | 2.99 | 6.98 | 2.02  | 2.9  | 1.34 | 0.92 | 0.76 | 0.19 |
| SPN4                                 | UN067628 | 116.13 | 128.17 | 130.66 | 51.50  | 28.87 | 22.78 | 10.76 | 4.20 | 3.03 | 6.74 | 2.84  | 3.6  | 1.49 | 0.94 | 0.85 | 0.23 |
| TOLL-8/TOLLO/TOLL 6                  | UN065961 | 8.43   | 5.05   | 2.16   | 1.33   | 0.29  | 0.26  | 0.15  | 0.08 | 0.35 | 0.22 | 0.22  | 0.08 | 0.06 | 0.03 | 0.02 | 0.04 |
| TRAF1                                | UN042308 | 13.29  | 13.35  | 7.54   | 6.91   | 3.35  | 2.73  | 1.51  | 1.37 | 0.98 | 1.32 | 0.65  | 0.38 | 0.37 | 0.41 | 0.03 | 0.08 |
| TRAF2                                | UN004752 | 2.75   | 2.93   | 3.94   | 1.73   | 1.12  | 0.95  | 0.53  | 0.43 | 0.56 | 0.28 | 0.48  | 0.31 | 0.32 | 0.31 | 0.27 | 0.23 |
| UEV1A                                | UN049742 | 41.92  | 98.87  | 137.08 | 125.26 | 67.22 | 49.57 | 20.45 | 7.44 | 1.79 | 8.13 | 10.68 | 9.4  | 1.67 | 3.29 | 0.29 | 0.52 |

\* Grey color indicates unigenes with expression level less than 5 RPKM at all time points

**Table S20. mRNA expression levels of T. ni homologs associated with histone deacetylase (HDAC) and Sirtuin genes.**

| Complex / Category | Gene*                 | T. ni Ortholog | RPKM  |       |       |       |       |       |      |      | STDEV |      |      |      |      |      |      |      |      |
|--------------------|-----------------------|----------------|-------|-------|-------|-------|-------|-------|------|------|-------|------|------|------|------|------|------|------|------|
|                    |                       |                | C     | 0     | 6     | 12    | 18    | 24    | 36   | 48   | C     | 0    | 6    | 12   | 18   | 24   | 36   | 48   |      |
| Class I            | HDAC1 (Rpd3)<br>HDAC3 | UN068617       | 63.86 | 54.33 | 91.61 | 48.81 | 28.10 | 18.54 | 7.57 | 3.84 |       | 1.79 | 1.61 | 3.47 | 1.04 | 0.88 | 0.59 | 0.24 | 0.49 |
|                    |                       | UN067194       | 7.49  | 6.28  | 5.11  | 3.69  | 2.17  | 1.93  | 0.89 | 0.56 |       | 0.20 | 0.37 | 0.24 | 0.26 | 0.34 | 0.30 | 0.09 | 0.03 |
| Class II           | HDAC4 / HDAC6         | UN065394       | 4.73  | 4.64  | 5.94  | 5.08  | 3.13  | 2.40  | 1.80 | 1.19 |       | 0.13 | 0.15 | 0.45 | 0.49 | 0.21 | 0.14 | 0.11 | 0.1  |
| Class III          | Sirt1 / Sirt2         | UN001946       | 12.38 | 8.71  | 16.38 | 11.64 | 7.15  | 5.53  | 2.82 | 1.46 |       | 0.26 | 0.65 | 0.3  | 0.26 | 0.56 | 0.26 | 0.14 | 0.27 |
|                    |                       | UN003285       | 2.10  | 1.81  | 3.62  | 0.86  | 0.99  | 1.44  | 0.64 | 0.30 |       | 0.07 | 0.14 | 0.12 | 0.28 | 0.12 | 0.47 | 0.18 | 0.11 |
|                    | Sirt4 isoform A       | UN003284       | 1.75  | 1.26  | 3.01  | 0.73  | 0.85  | 1.23  | 0.48 | 0.29 |       | 0.10 | 0.23 | 0.07 | 0.21 | 0.03 | 0.37 | 0.29 | 0.05 |
|                    |                       | UN003286       | 1.64  | 1.04  | 3.52  | 0.83  | 1.06  | 1.11  | 0.61 | 0.24 |       | 0.29 | 0.48 | 0.21 | 0.36 | 0.41 | 0.55 | 0.41 | 0.12 |
|                    | Sirt6                 | UN034256       | 16.71 | 21.78 | 28.30 | 14.43 | 10.49 | 8.21  | 3.10 | 1.42 |       | 1.06 | 0.38 | 1.78 | 0.69 | 1.01 | 0.83 | 0.31 | 0.33 |
| Sirt7              | UN068768              | 3.33           | 5.23  | 4.33  | 3.19  | 2.07  | 0.94  | 0.44  | 0.16 |      | 0.56  | 0.32 | 0.67 | 0.73 | 0.2  | 0.36 | 0.18 | 0.14 |      |
| Class IV           | HDAC11                | UN010002       | 1.32  | 0.46  | 1.59  | 0.78  | 0.68  | 0.43  | 0.22 | 0.12 |       | 0.11 | 0.19 | 0.15 | 0.17 | 0.1  | 0.18 | 0.08 | 0.03 |

\* Grey color indicates unigenes with expression level less than 5 RPKM at all time points

Fig. S1

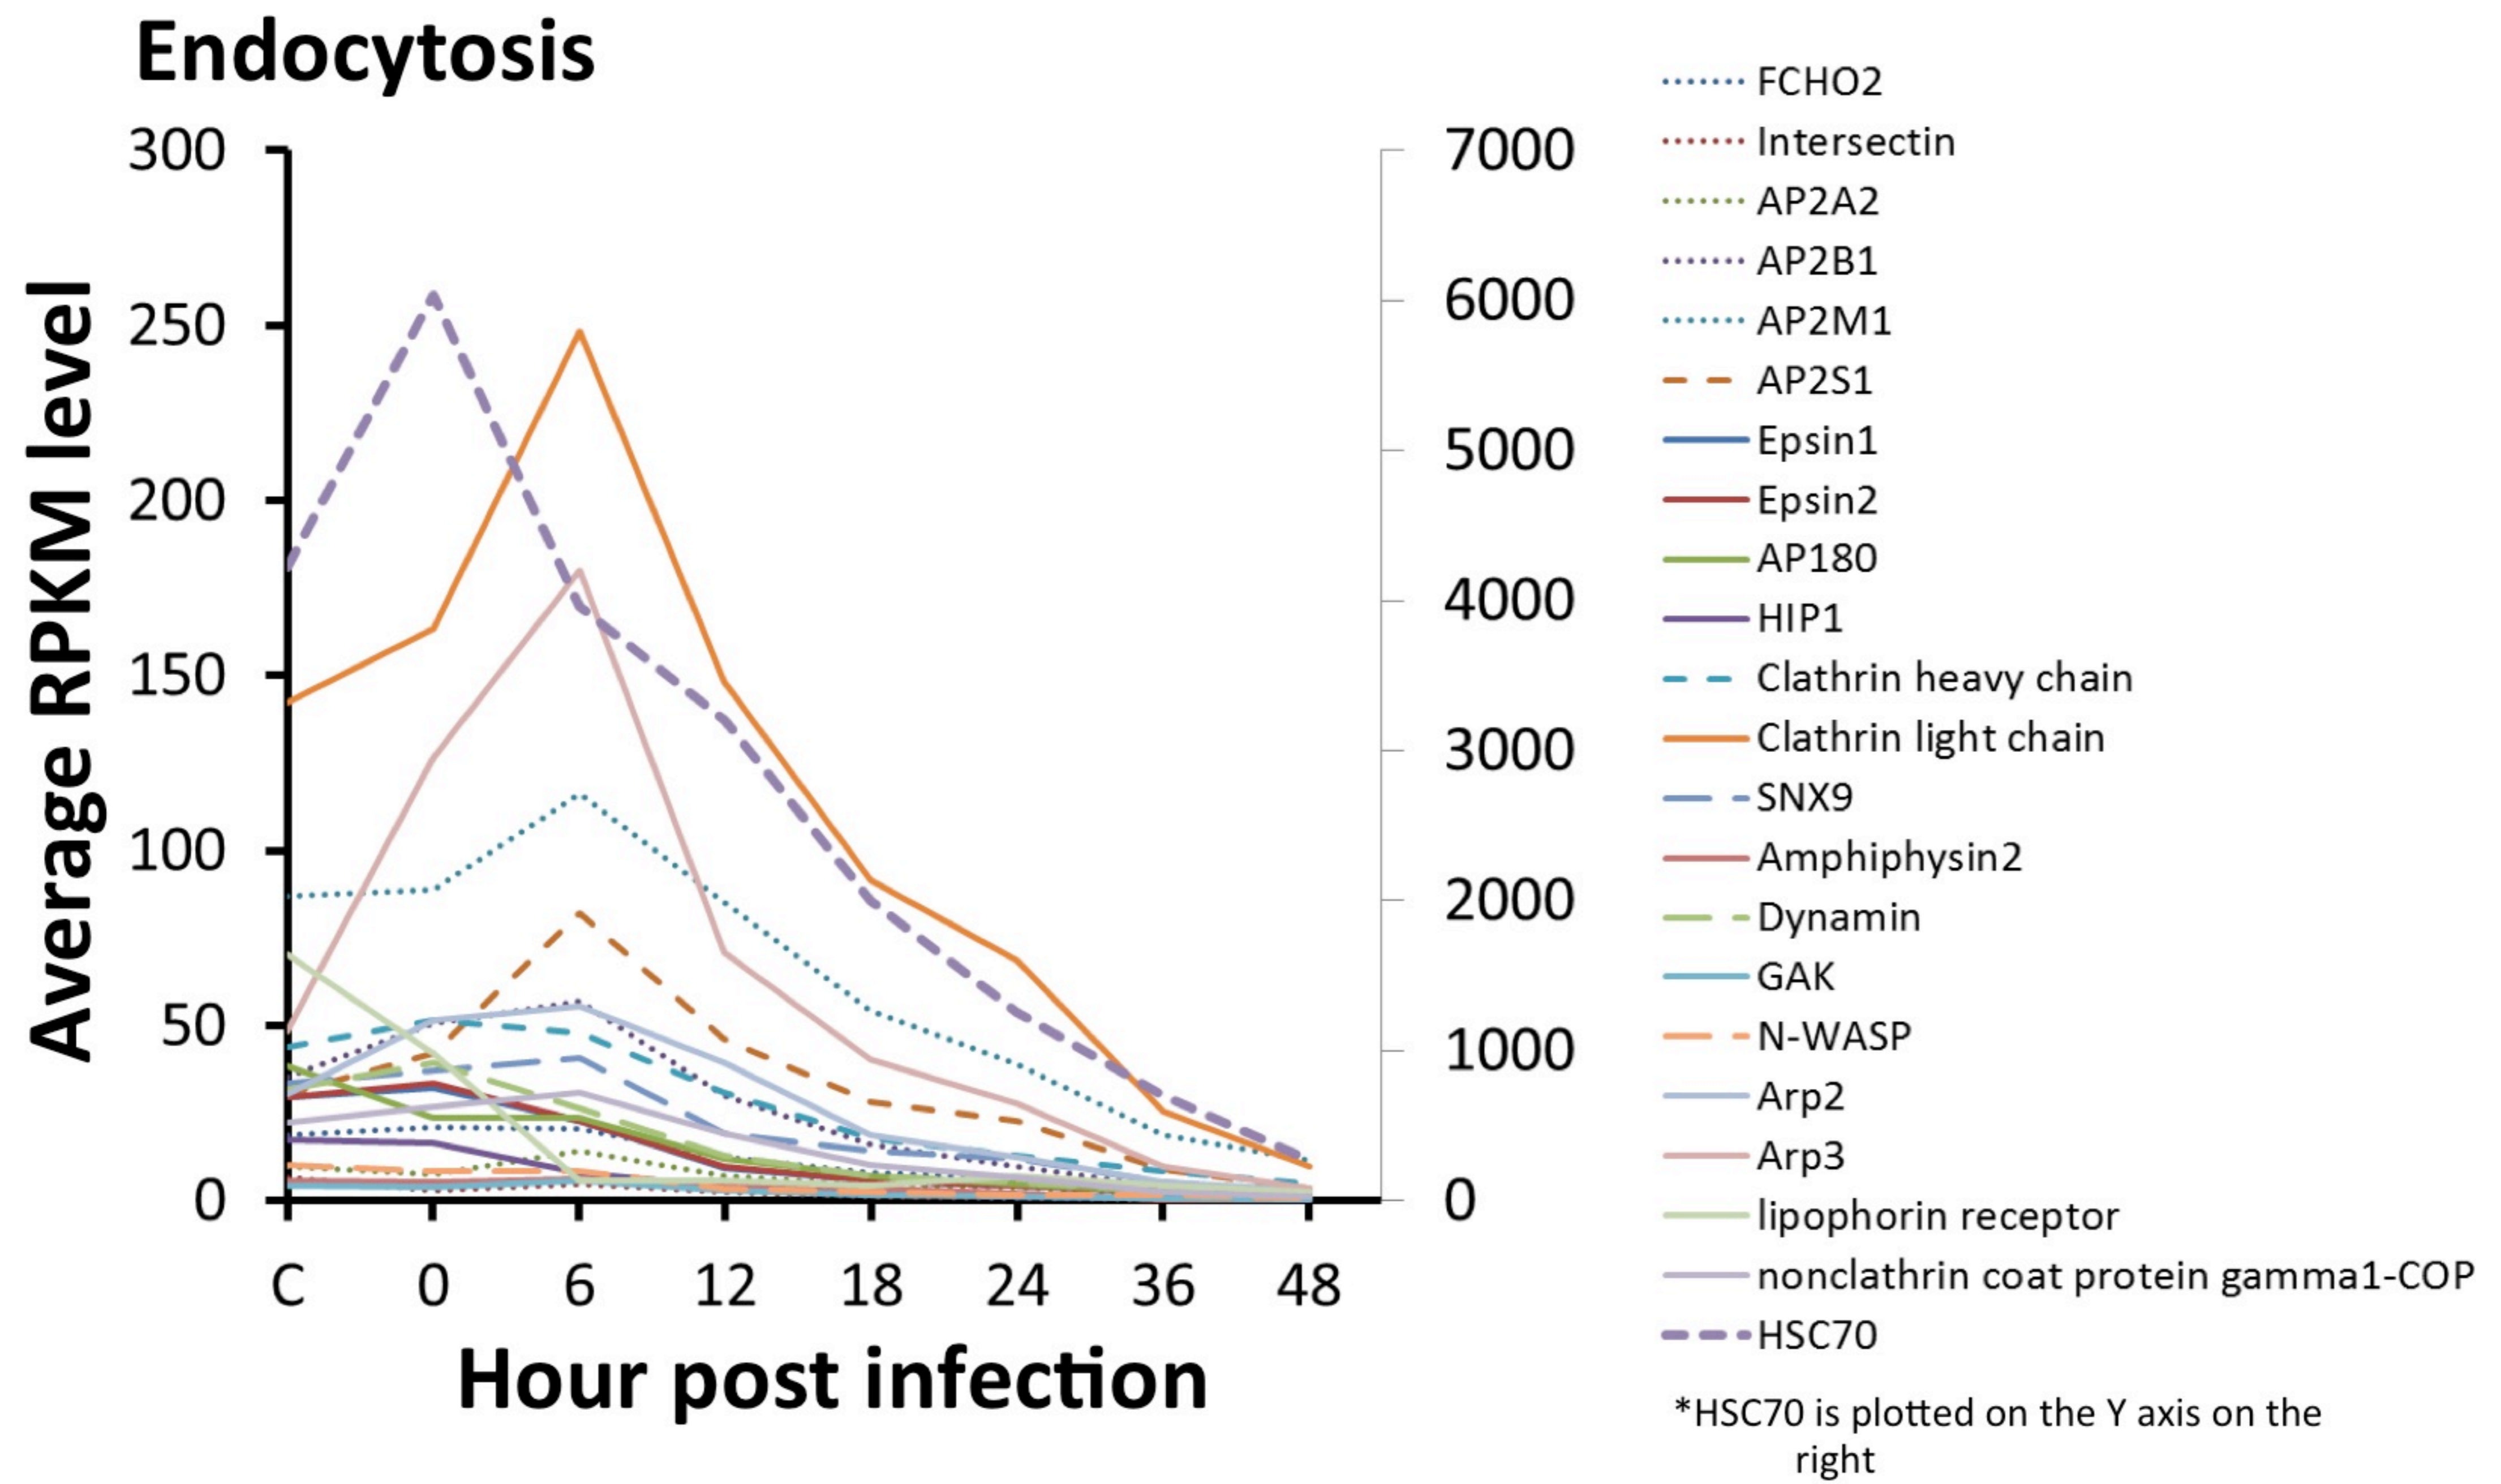



**Fig. S2**

**(A) Endosomal Sorting Complex Required for Transport (ESCRT)**

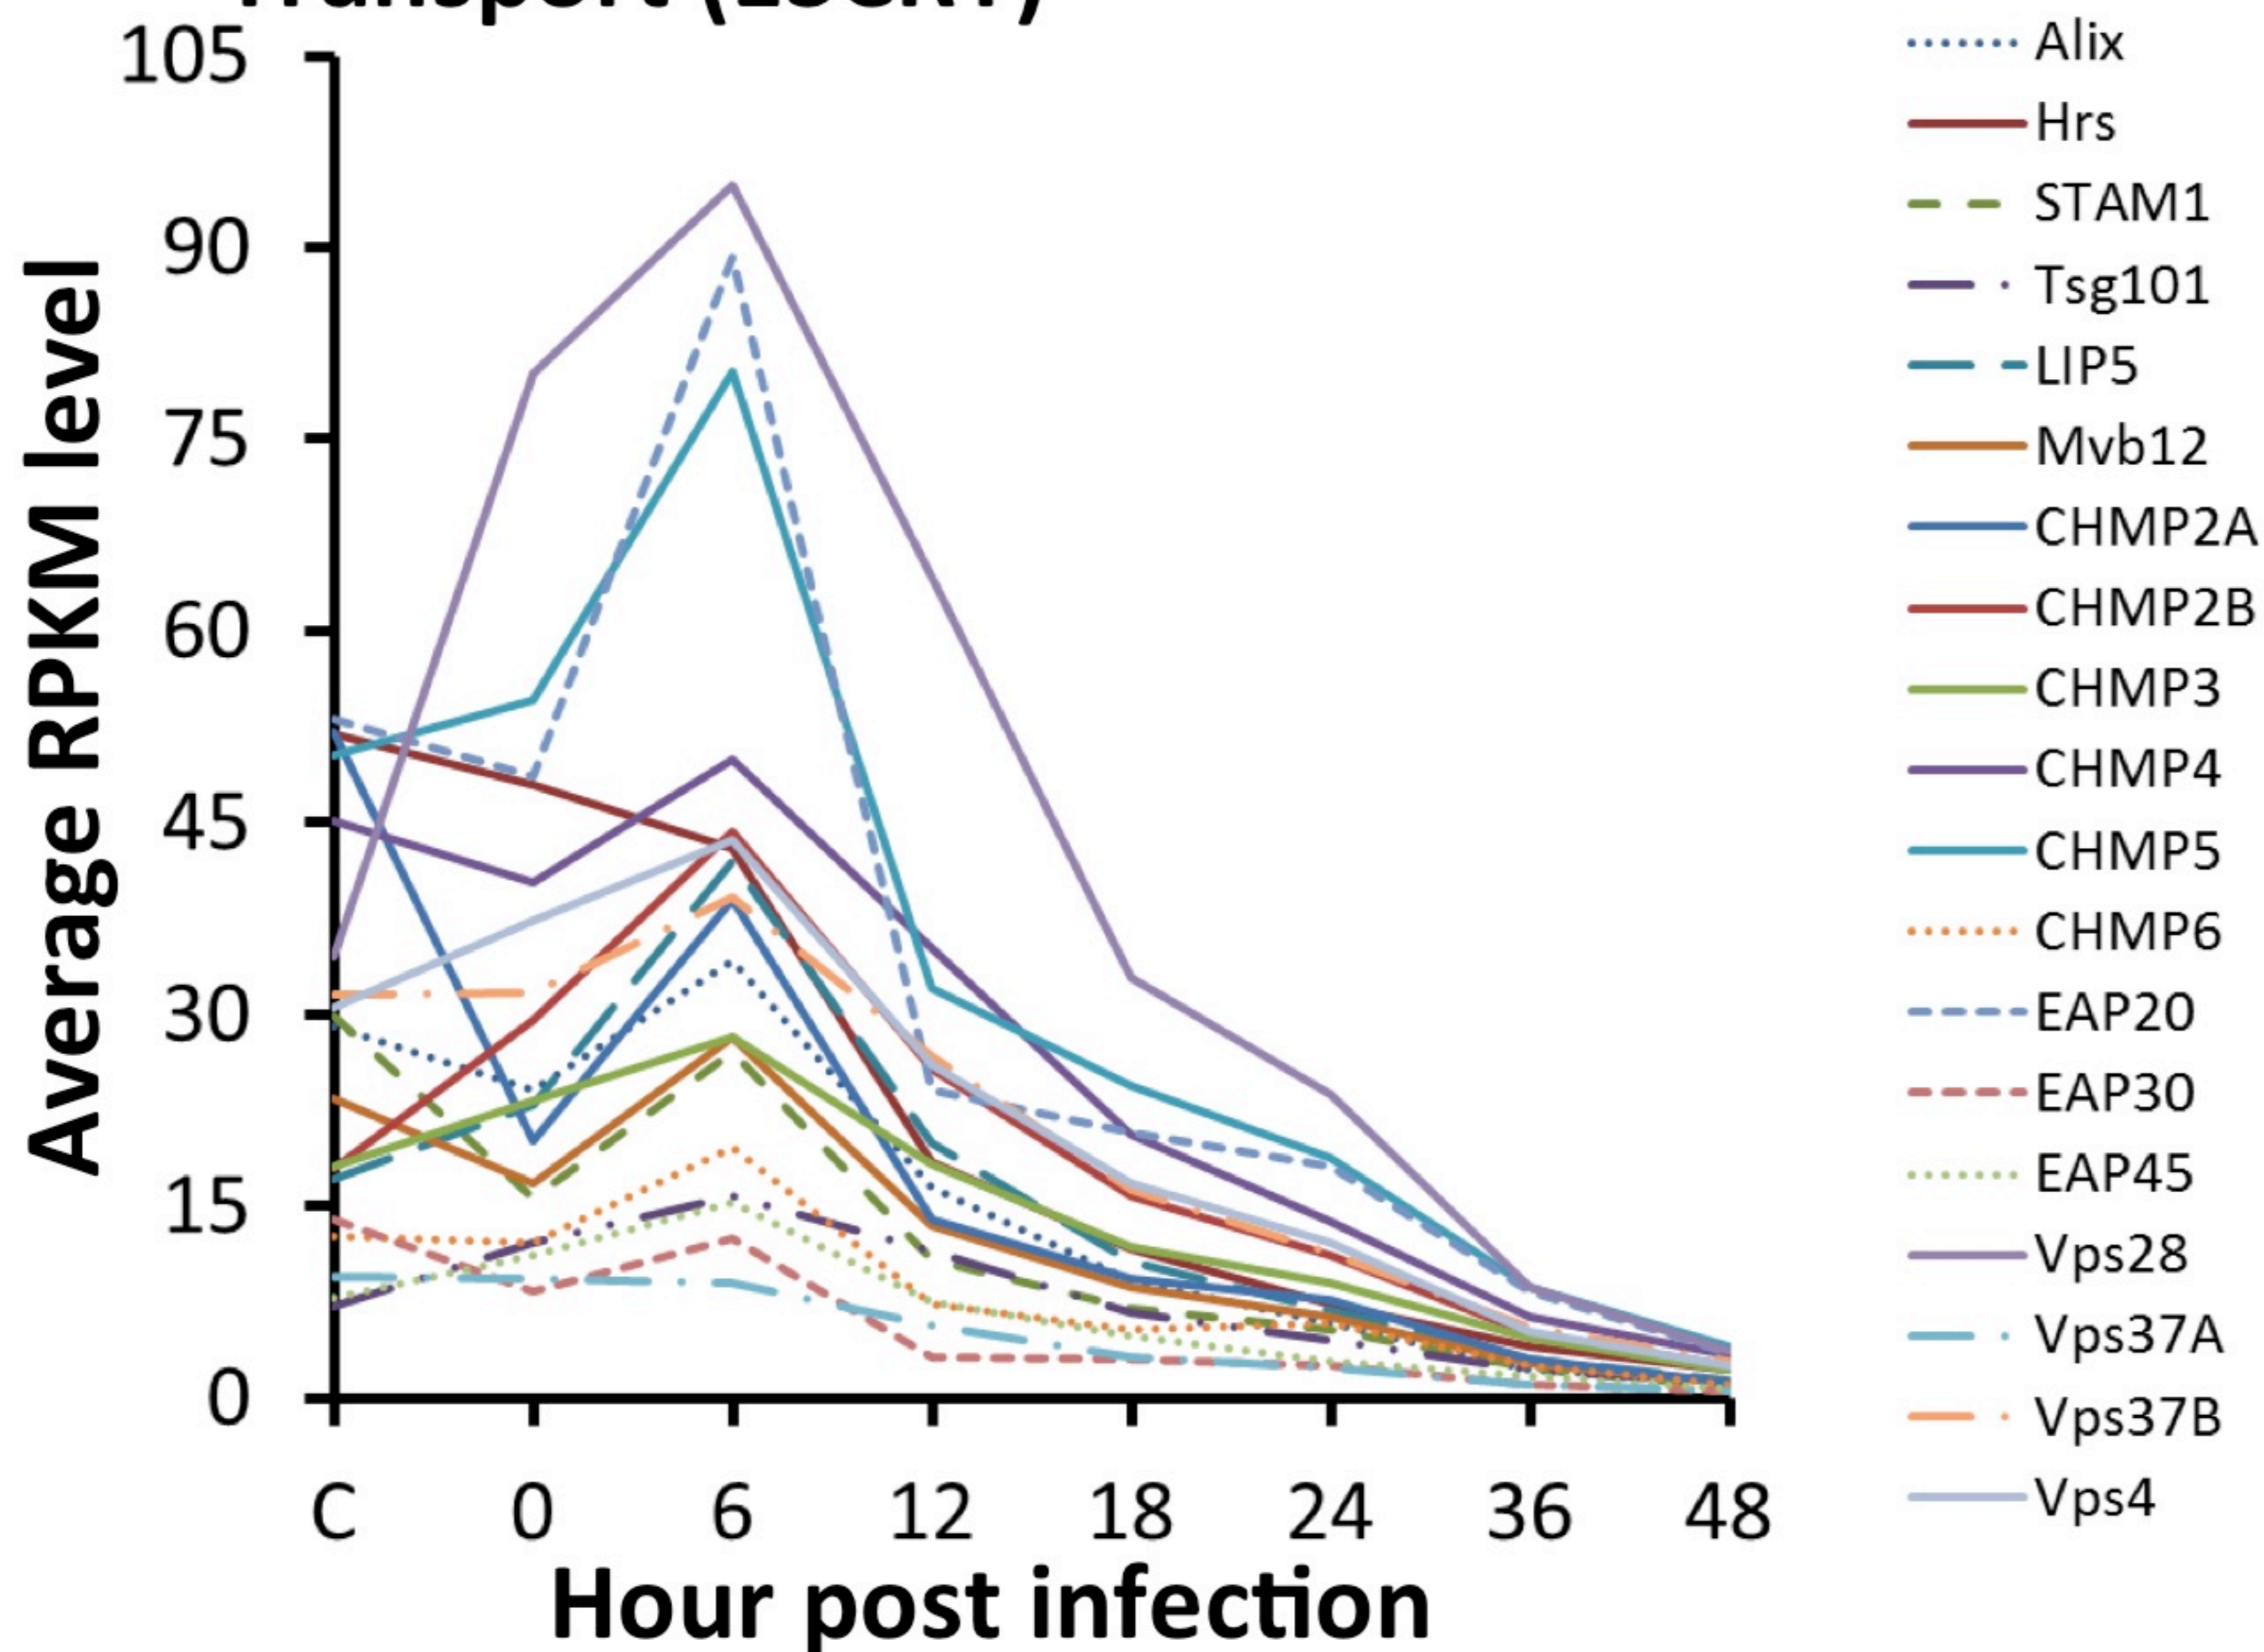

**(B) Vacuolar Protein Sorting complex C (VPS-C)**

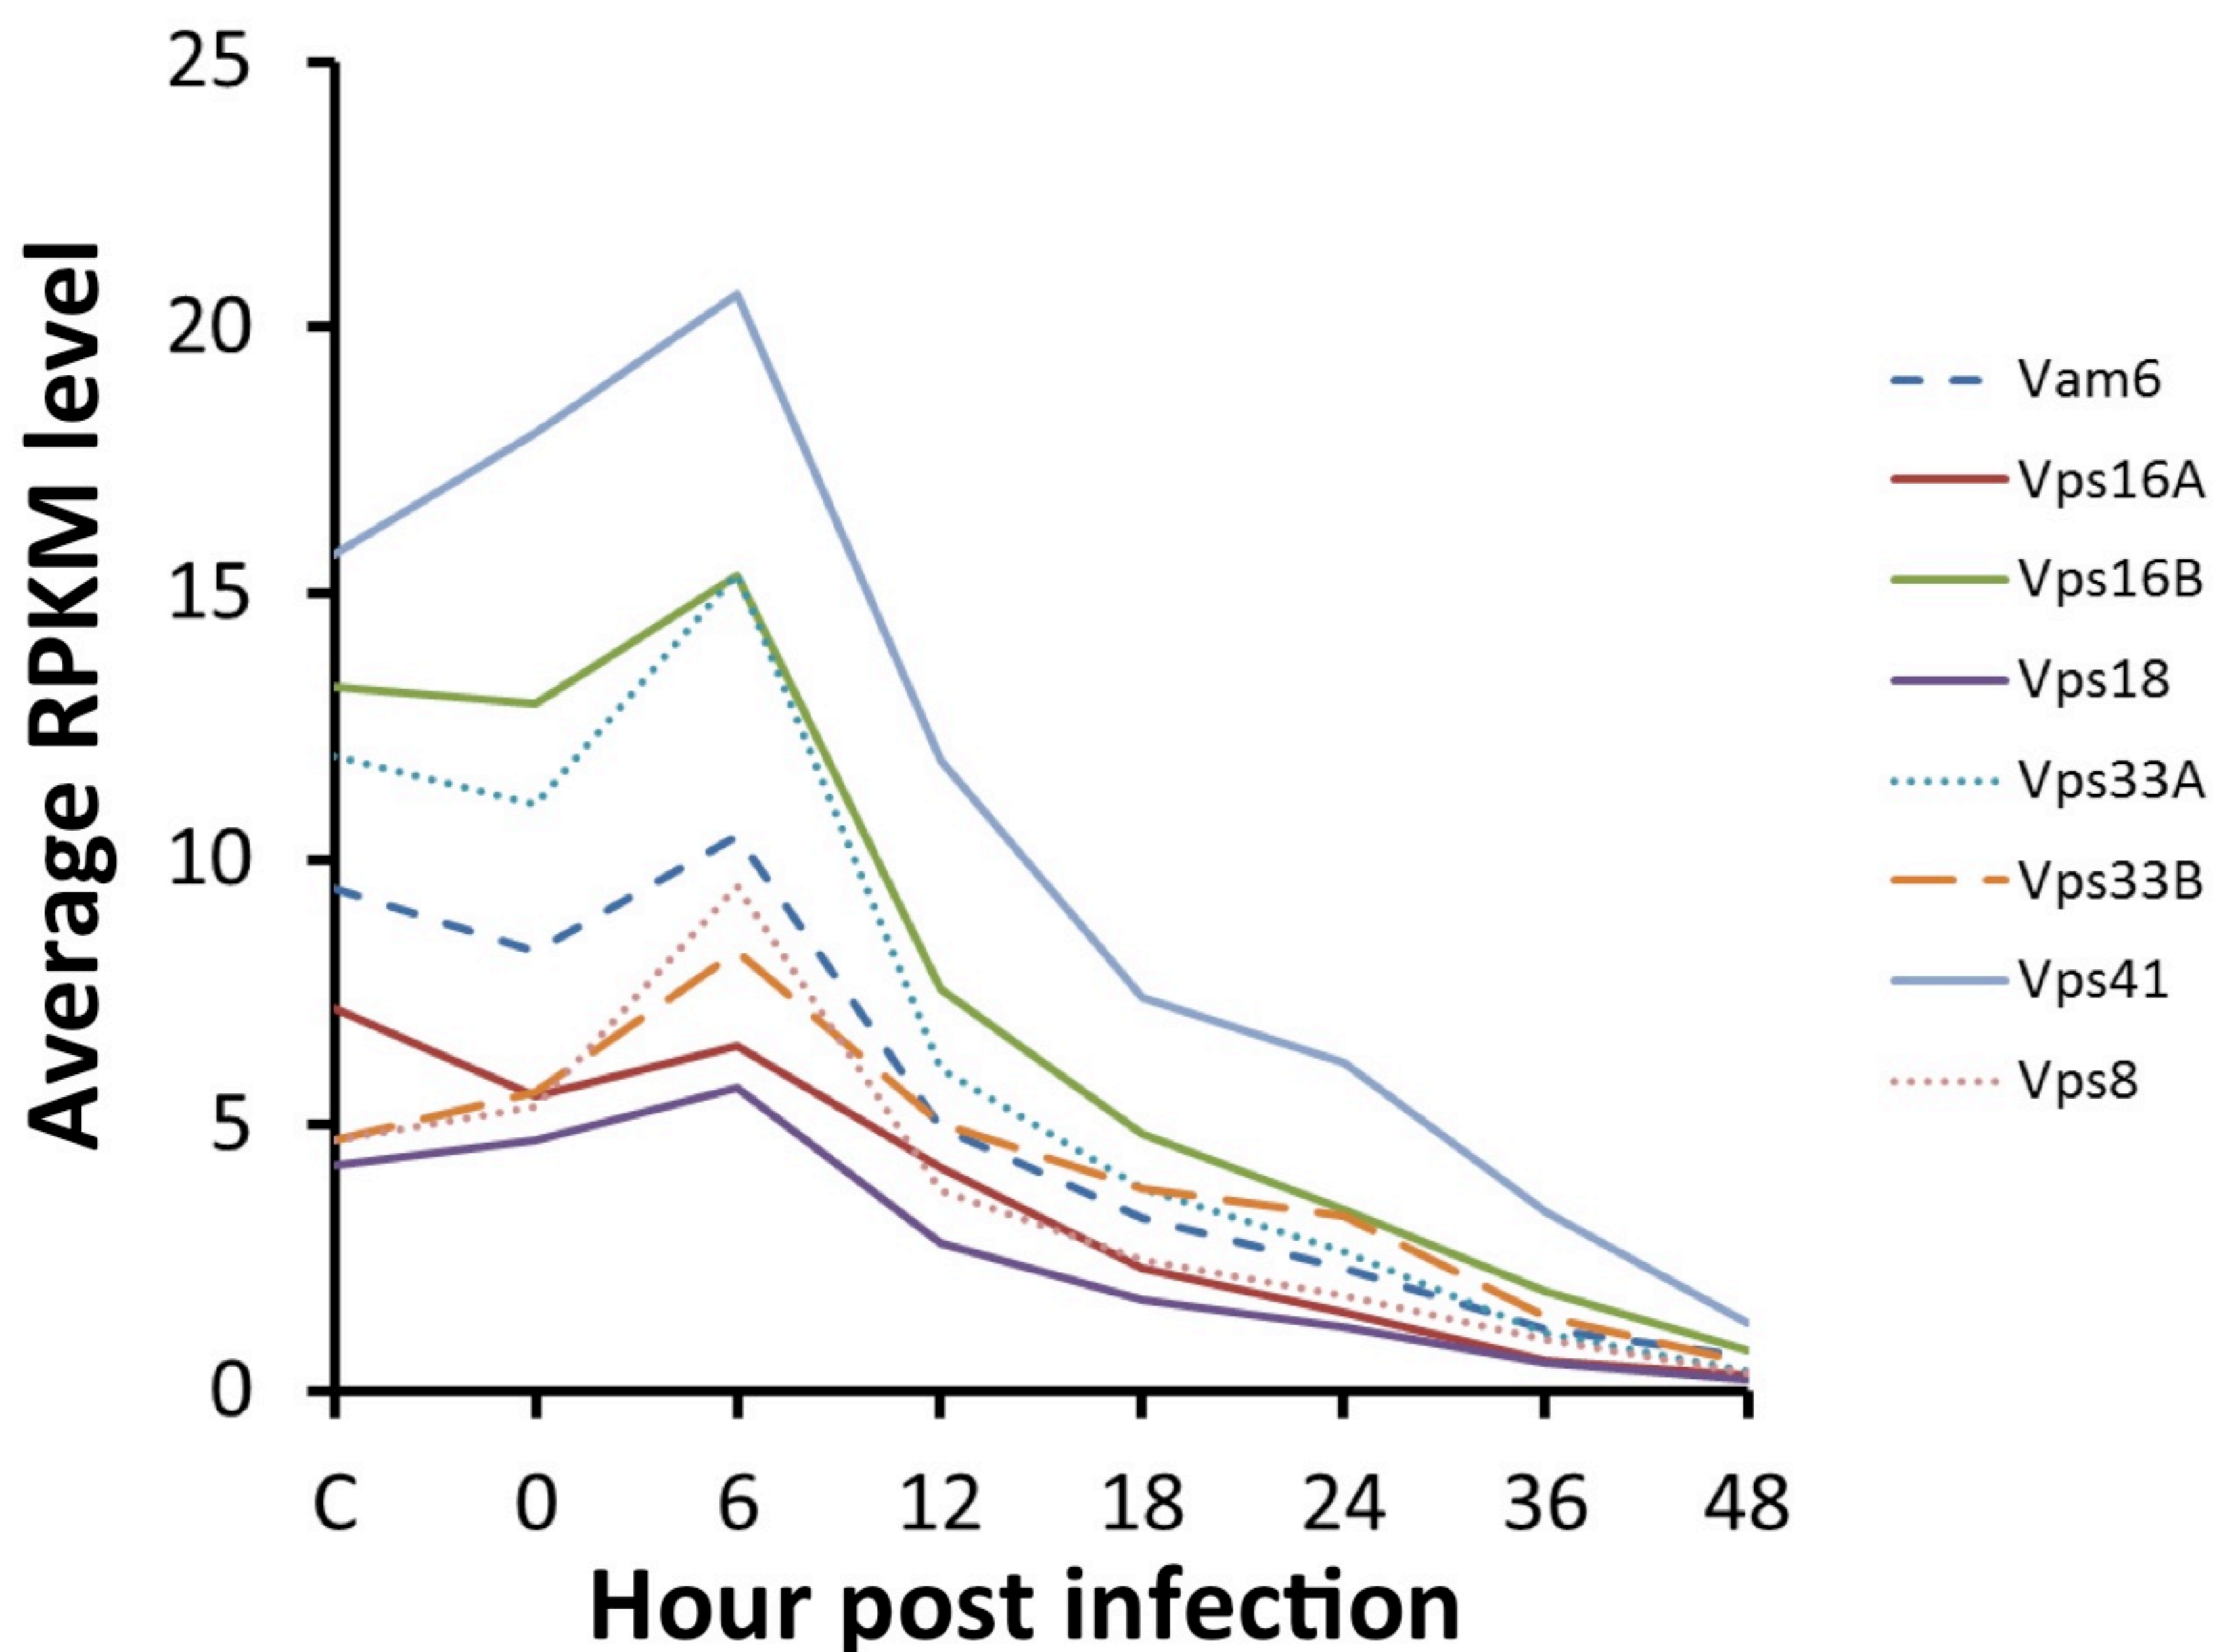



**Fig. S3**

**(A) Retromer & GARP**

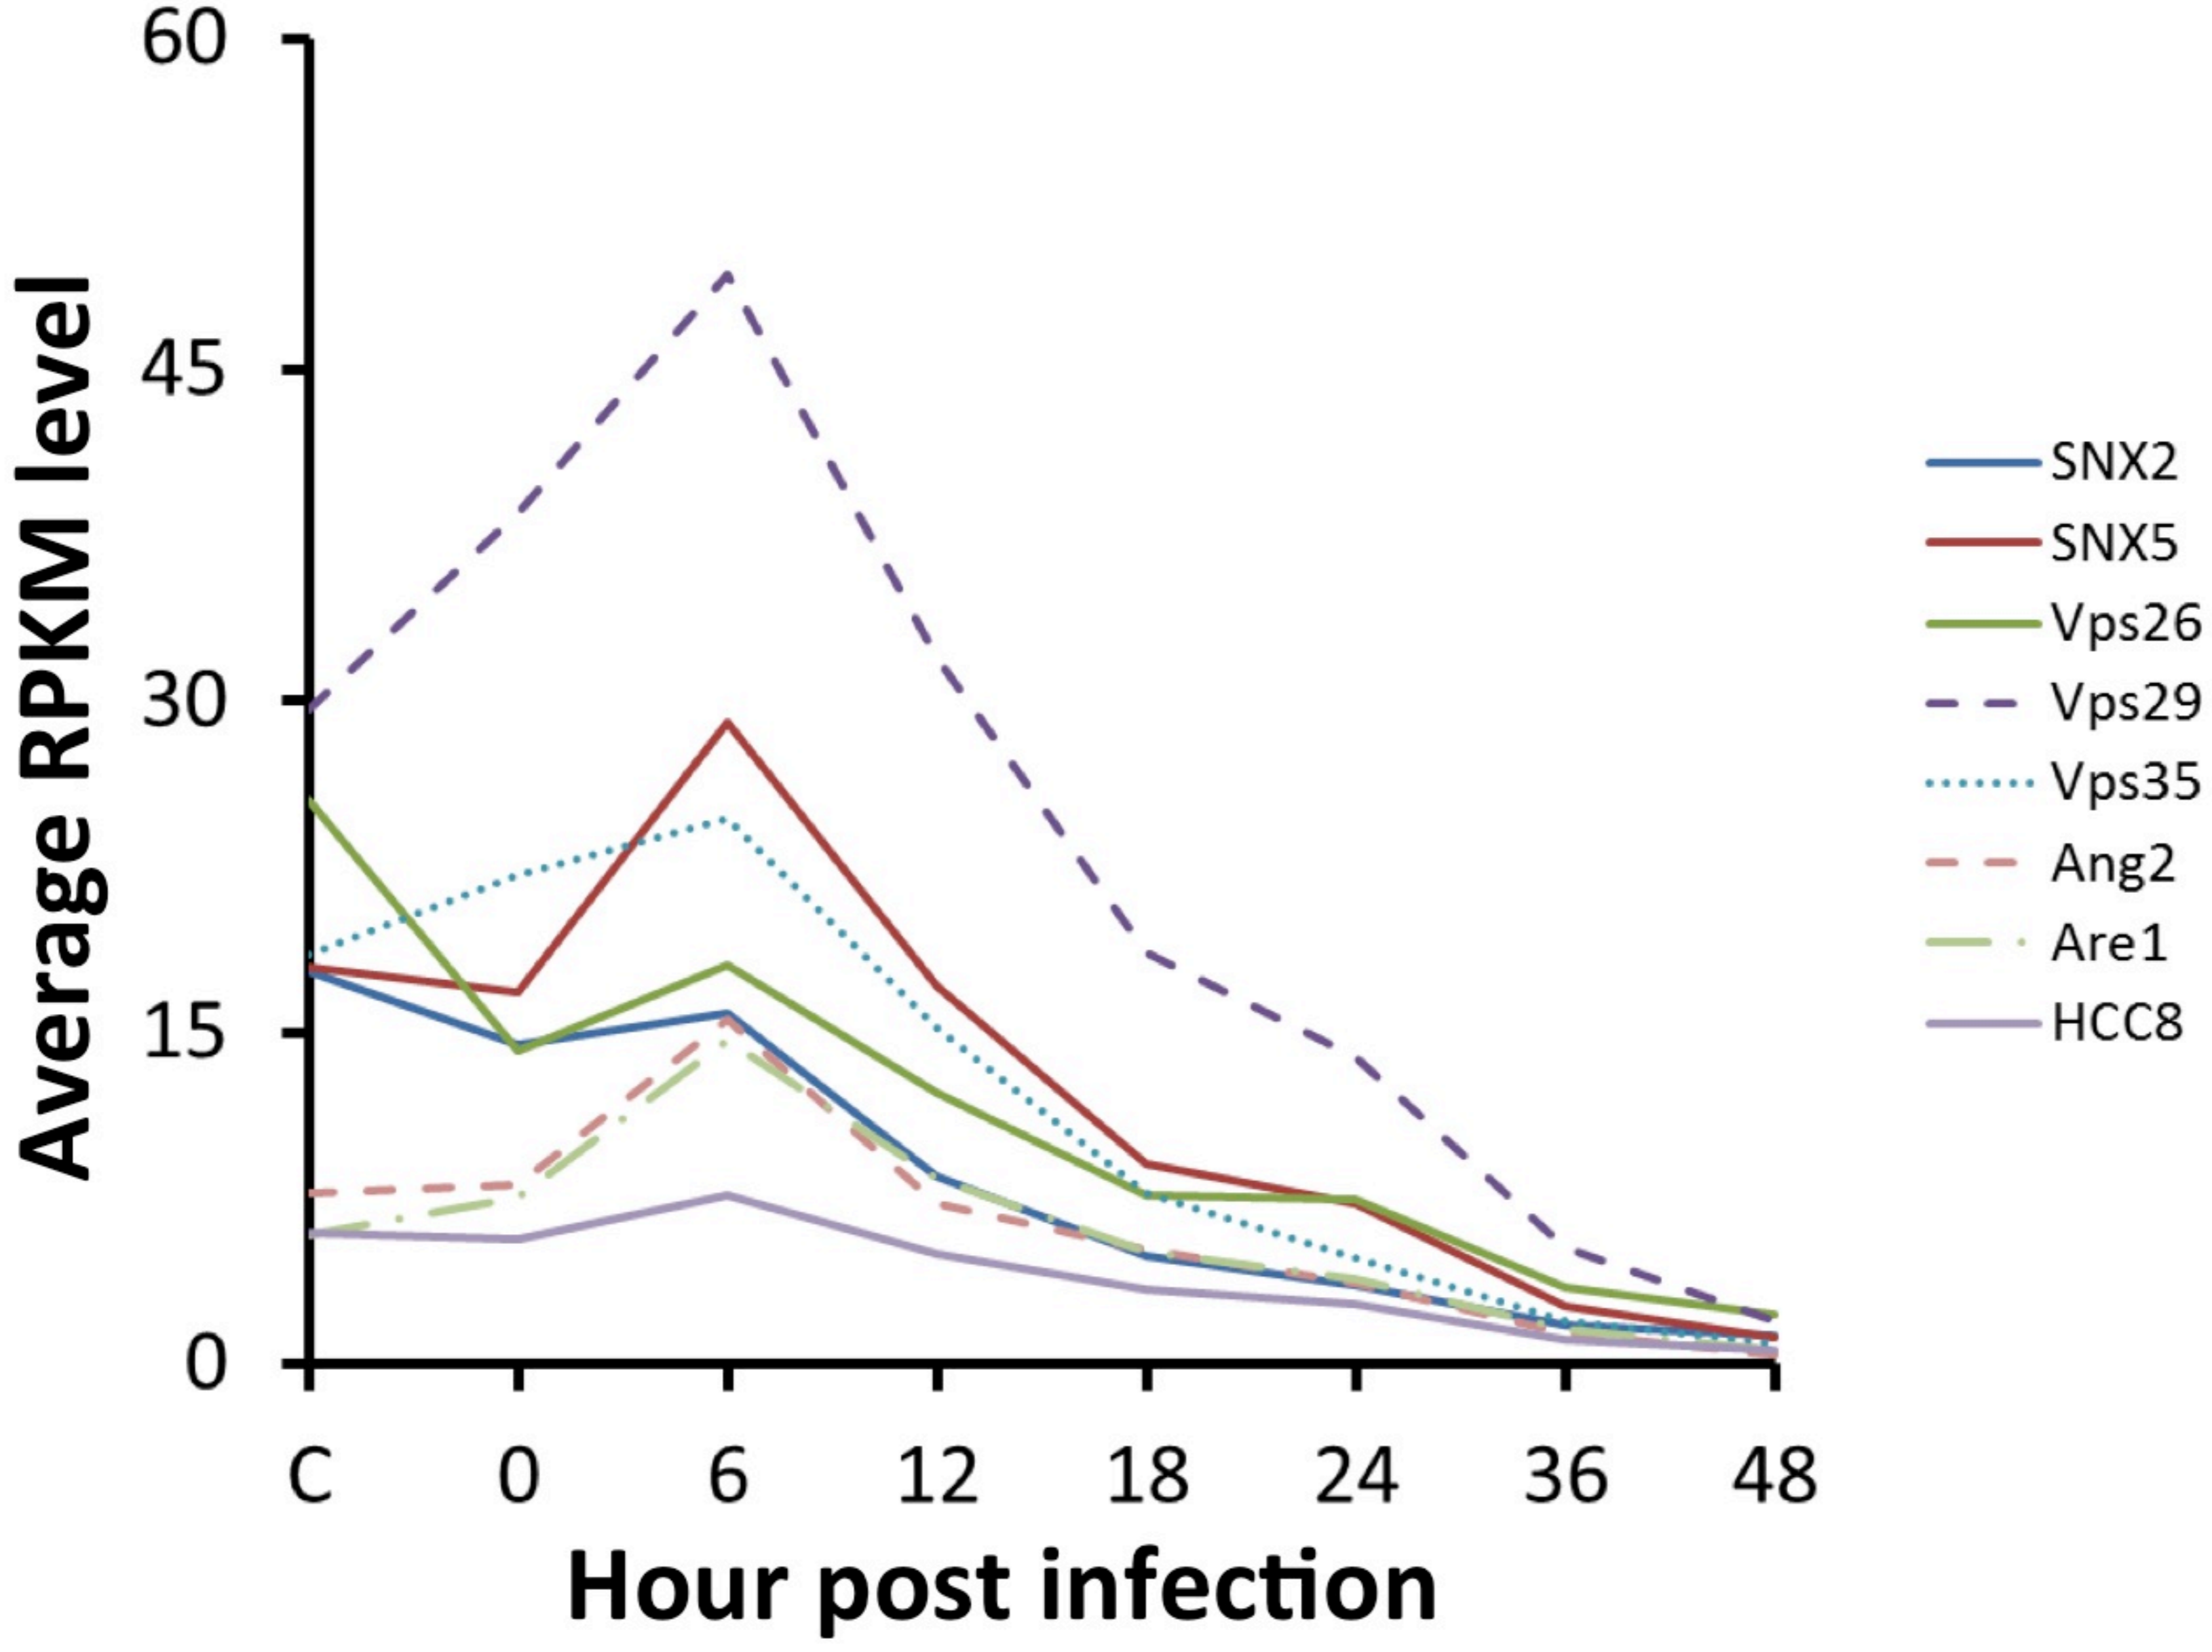

**(B) Other characterized Vps genes**

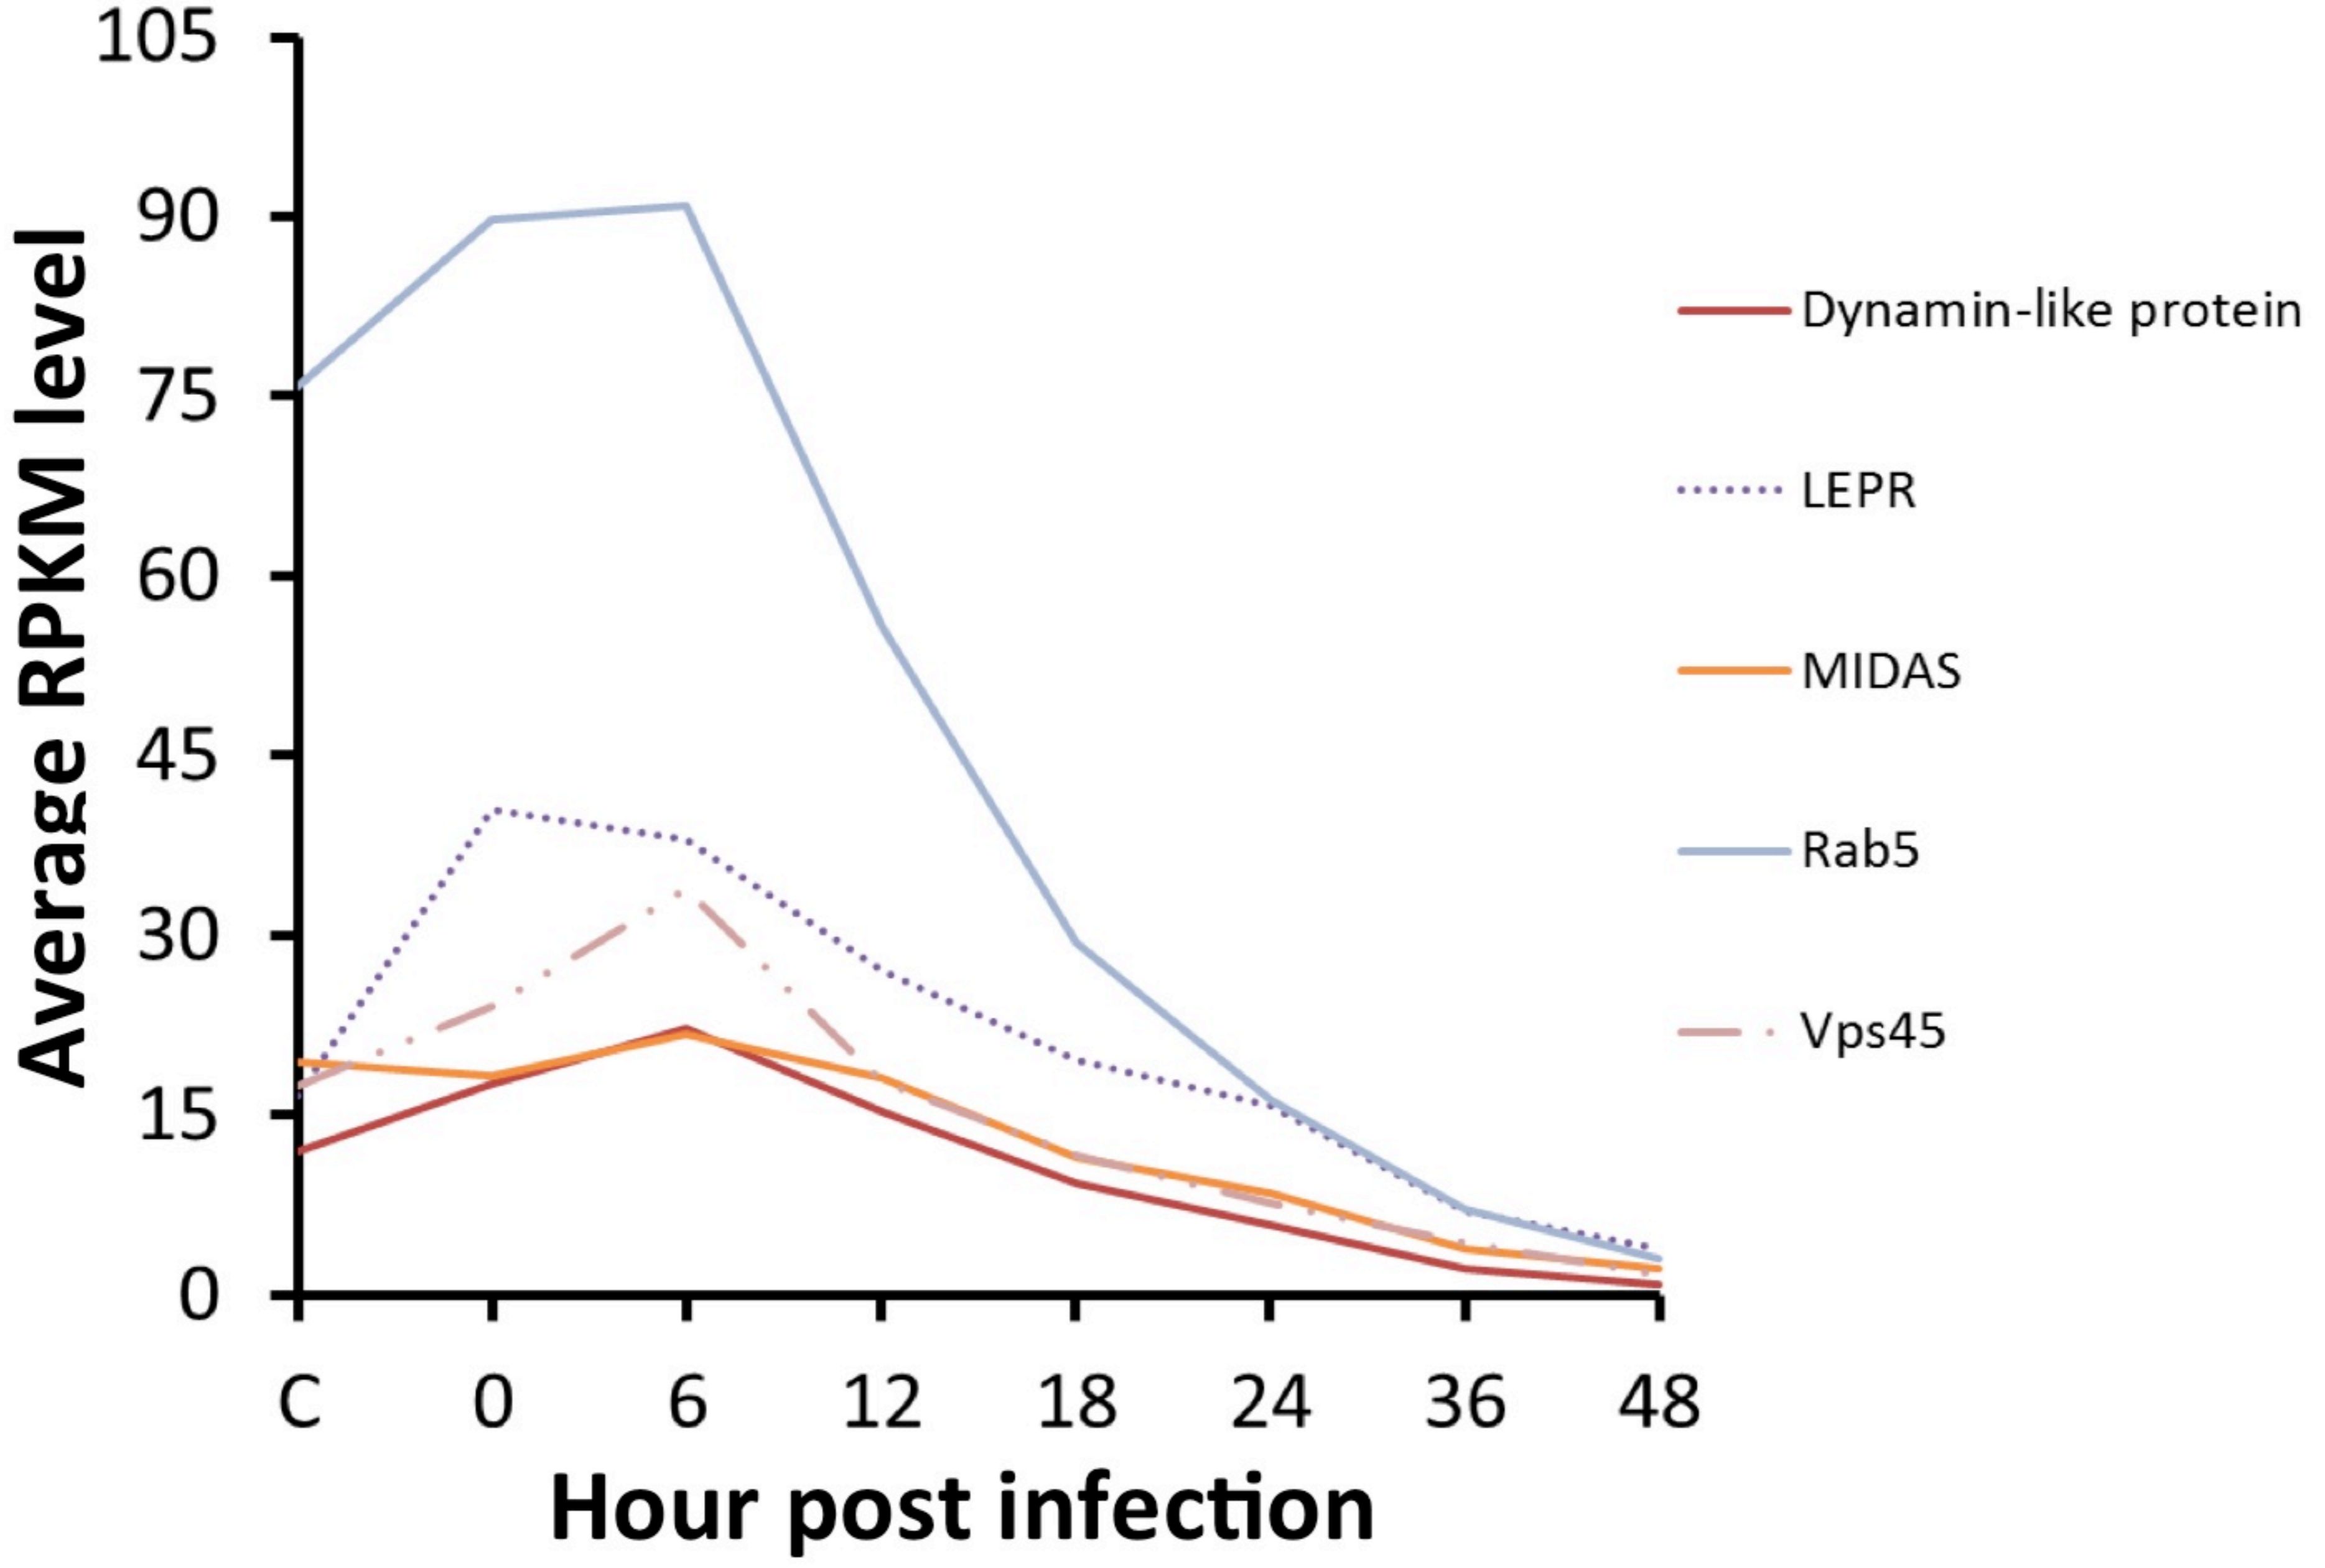



**Fig. S4**

**(A) PI3K**

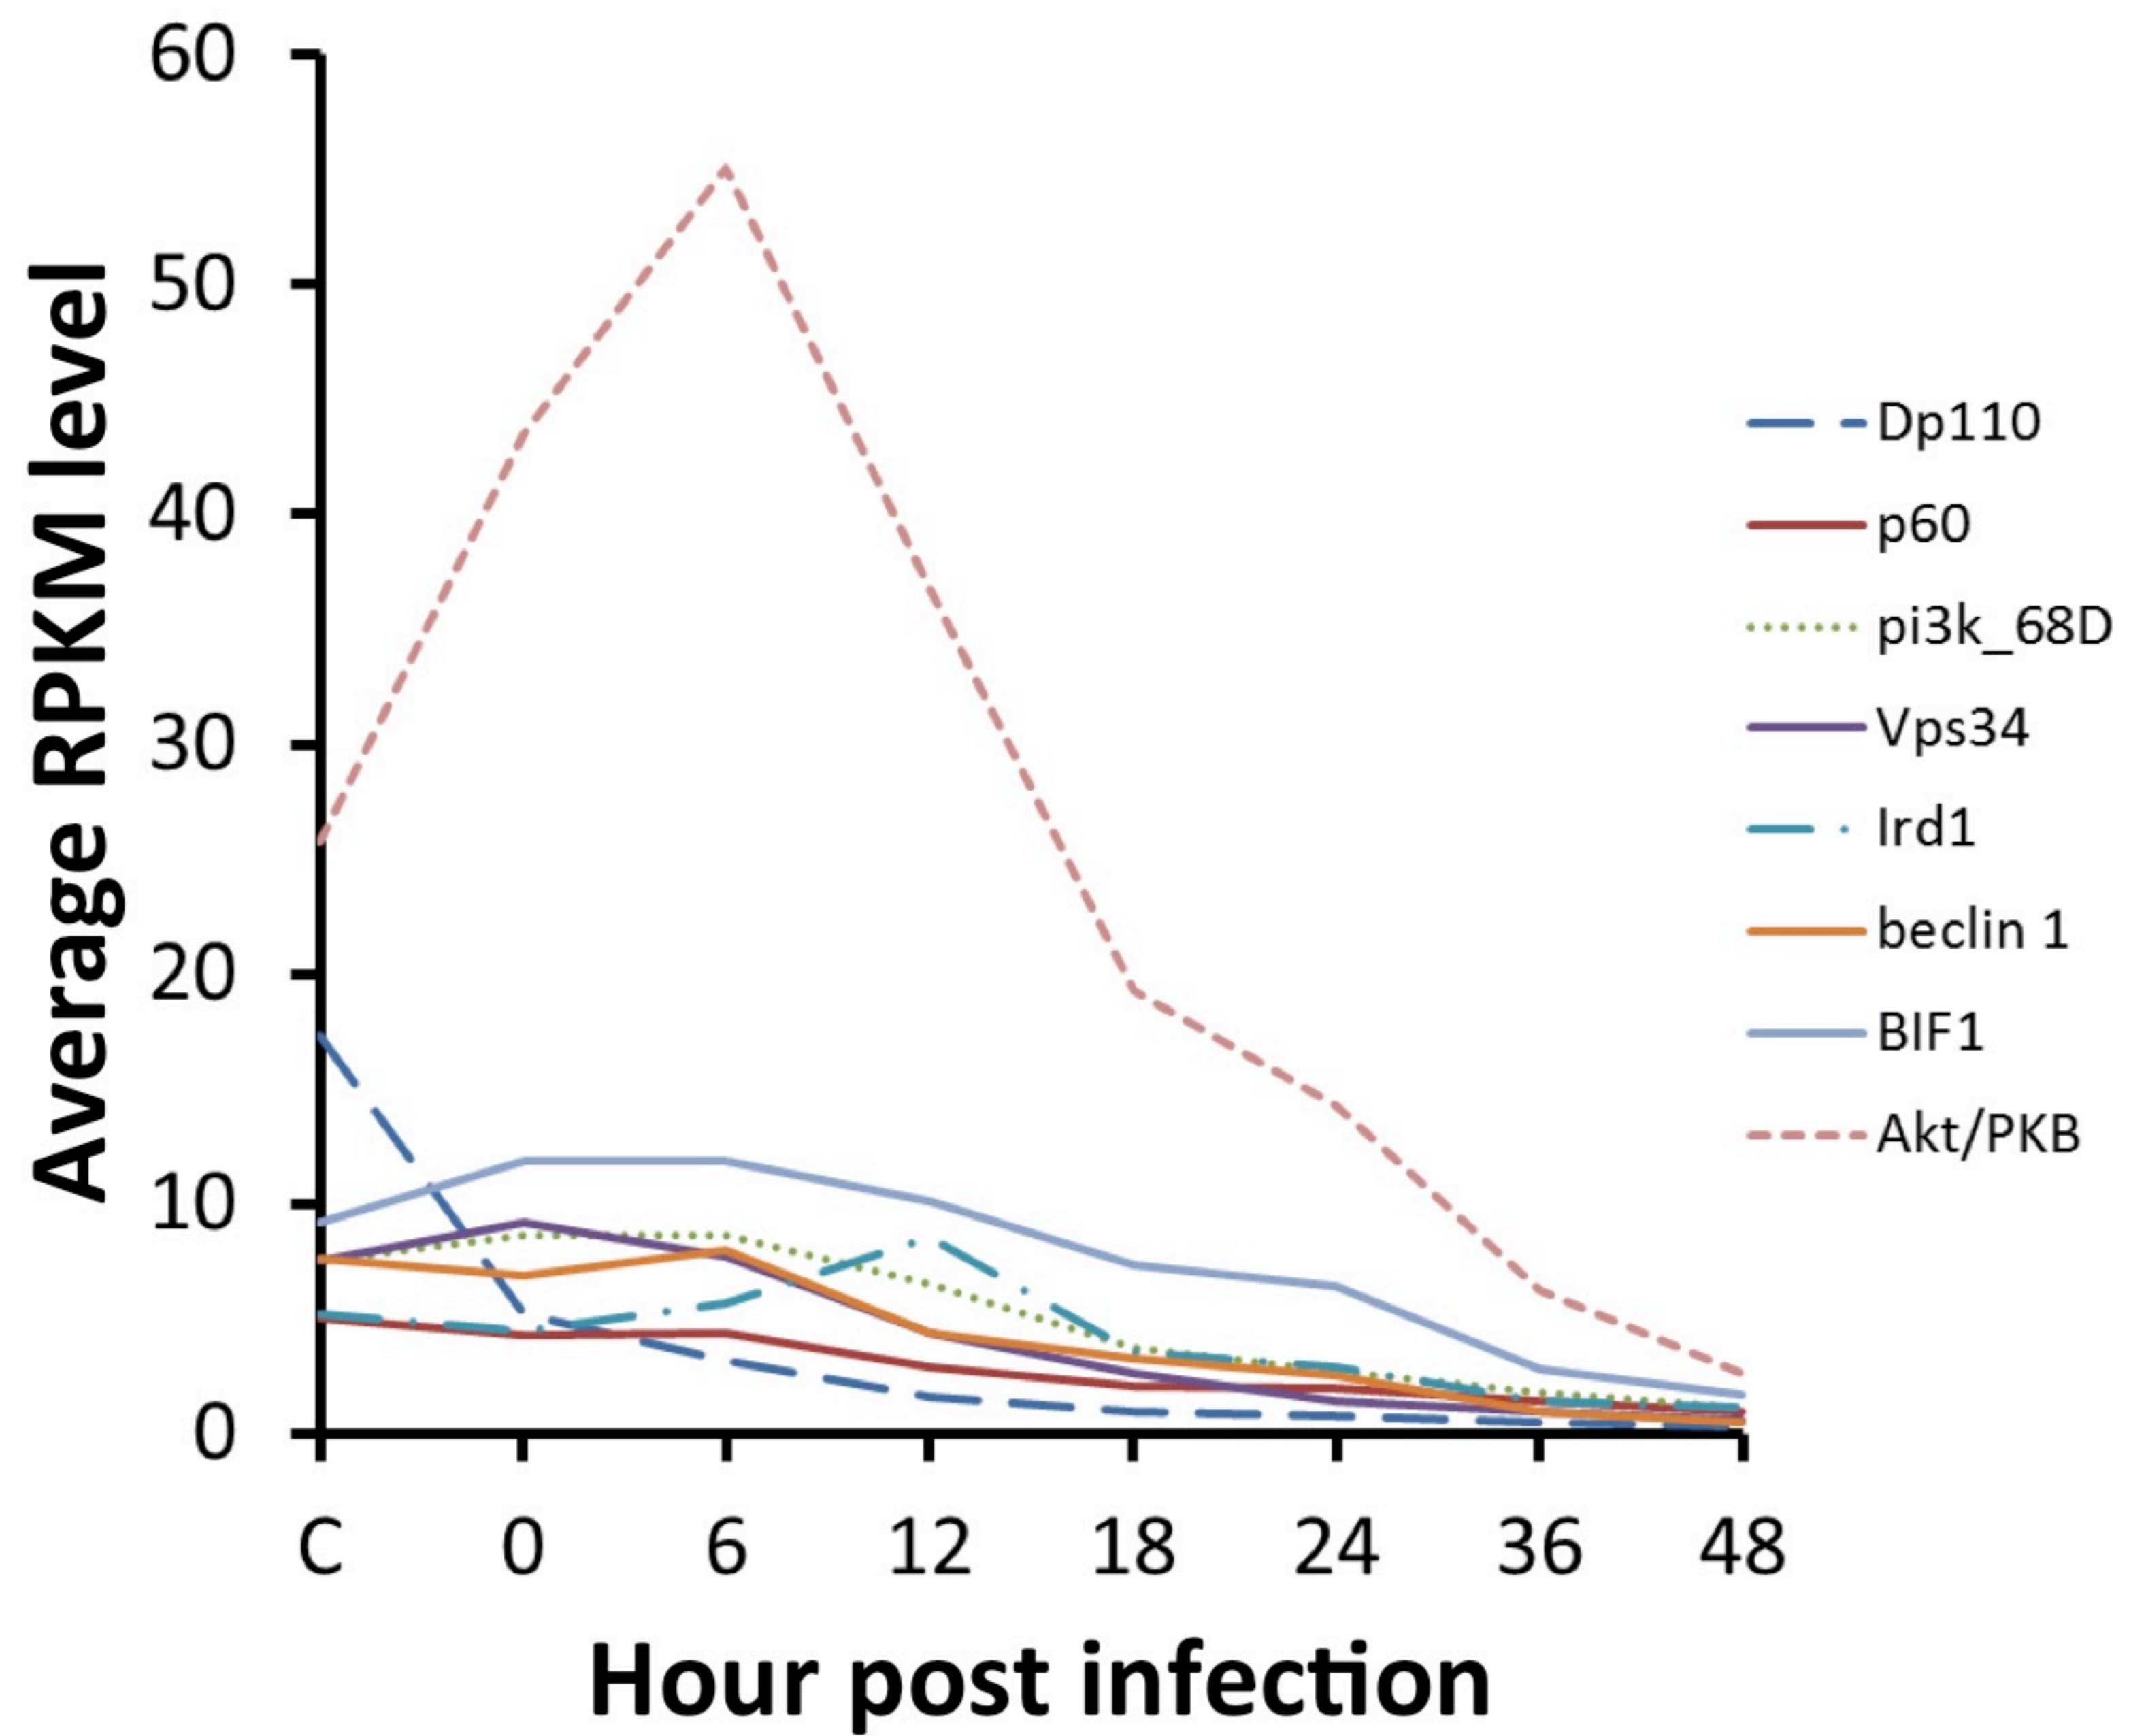

**(B) MAP Kinase Signaling pathway**

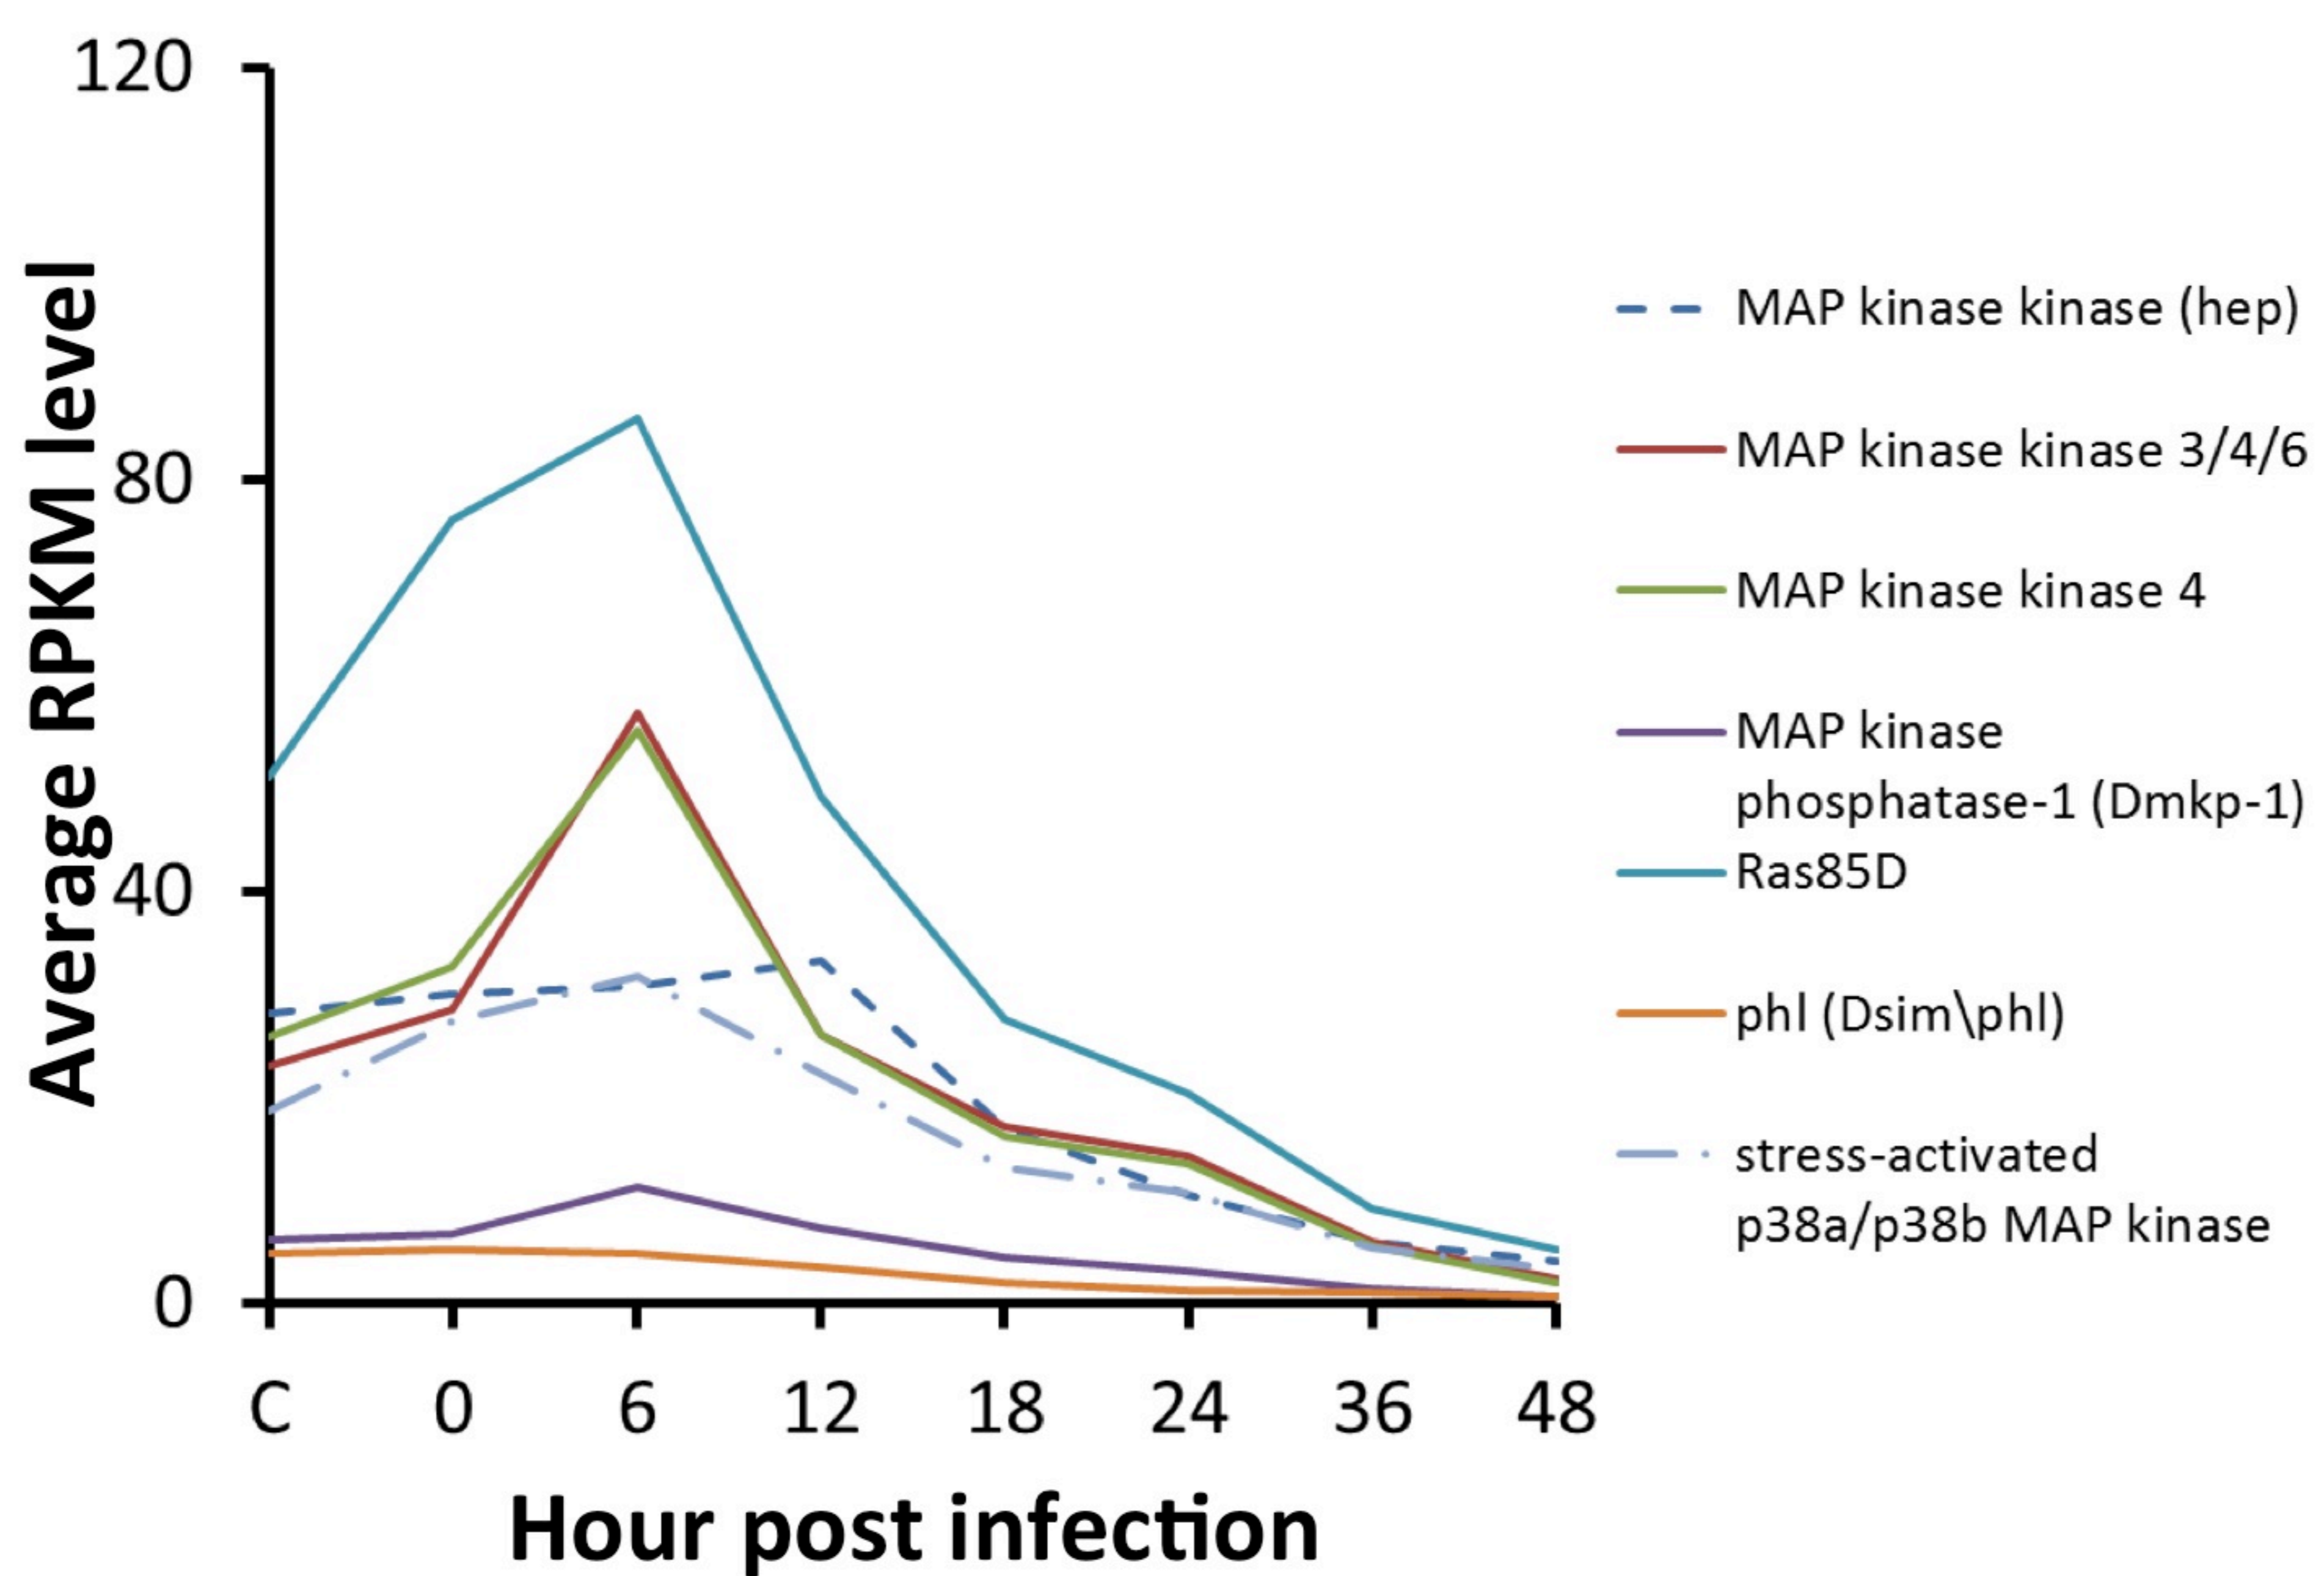







**Fig. S6**

### Small RNA

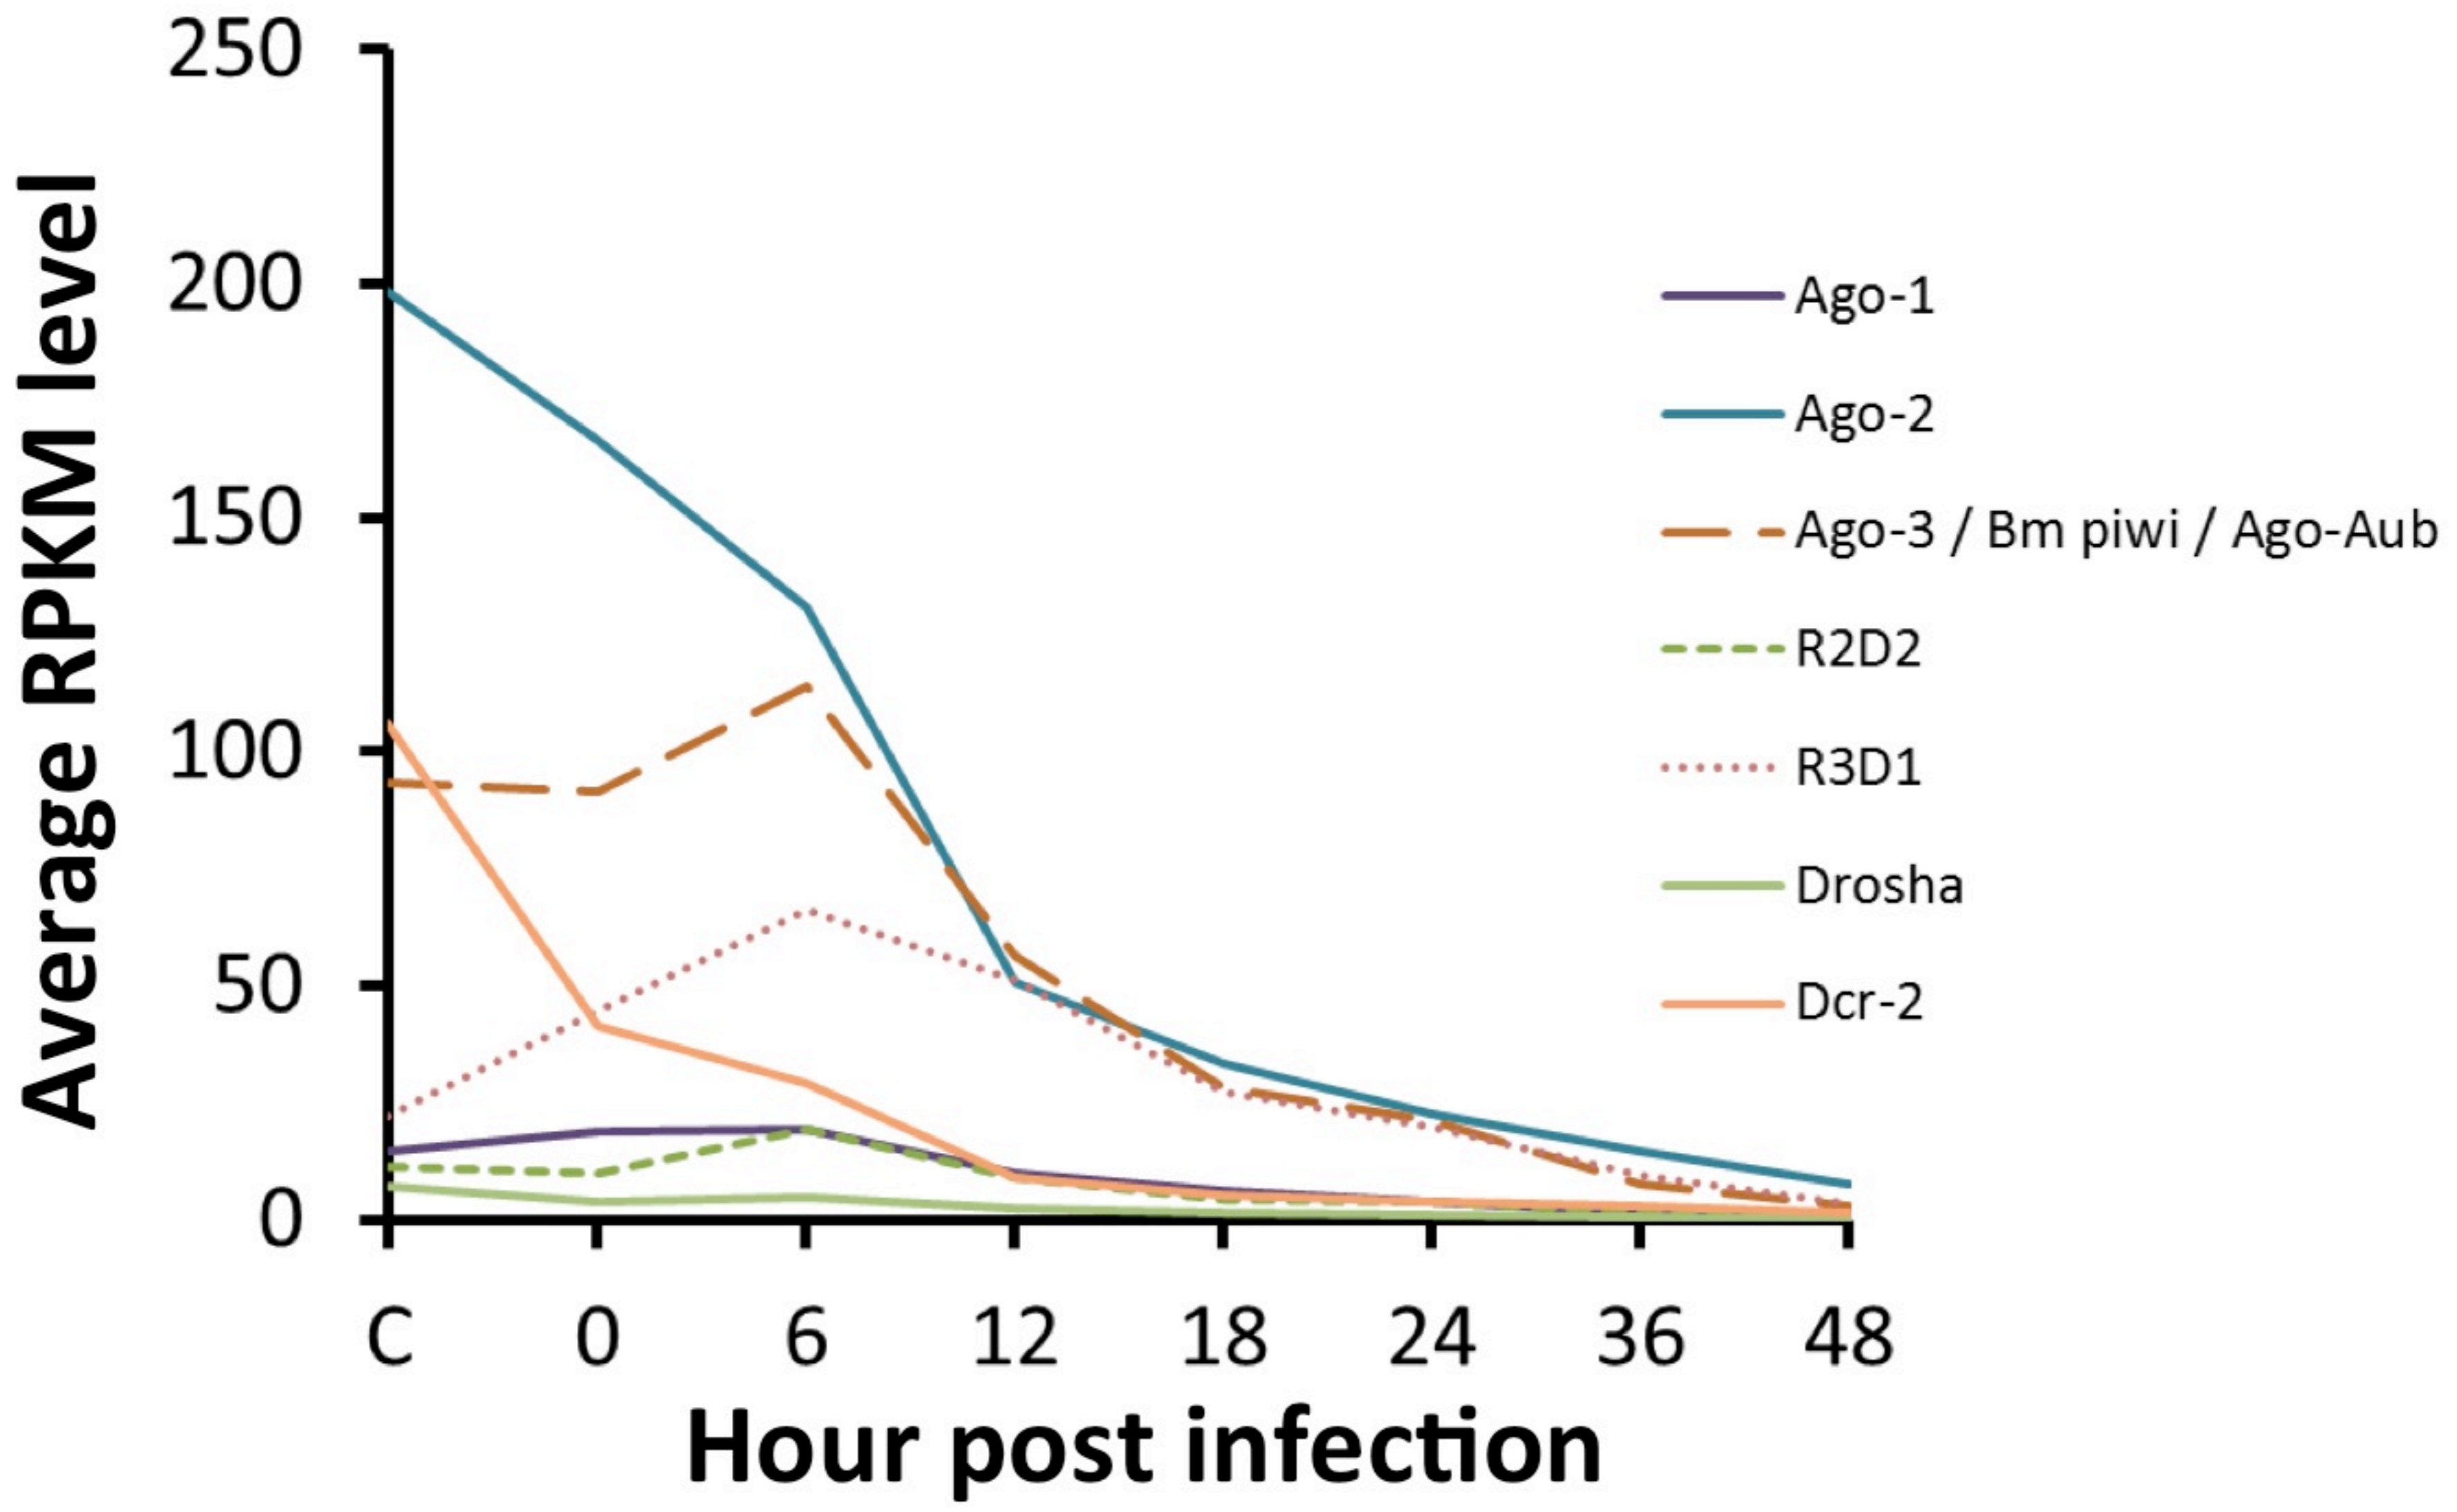

Note: Although we identified homologs of Dicer 1 (UN008847) and Pasha (UN010331) (see Table S15), RPKM values were below 5 and were therefore not included on the graph.



**Fig. S7**

**(A) Apoptosis**

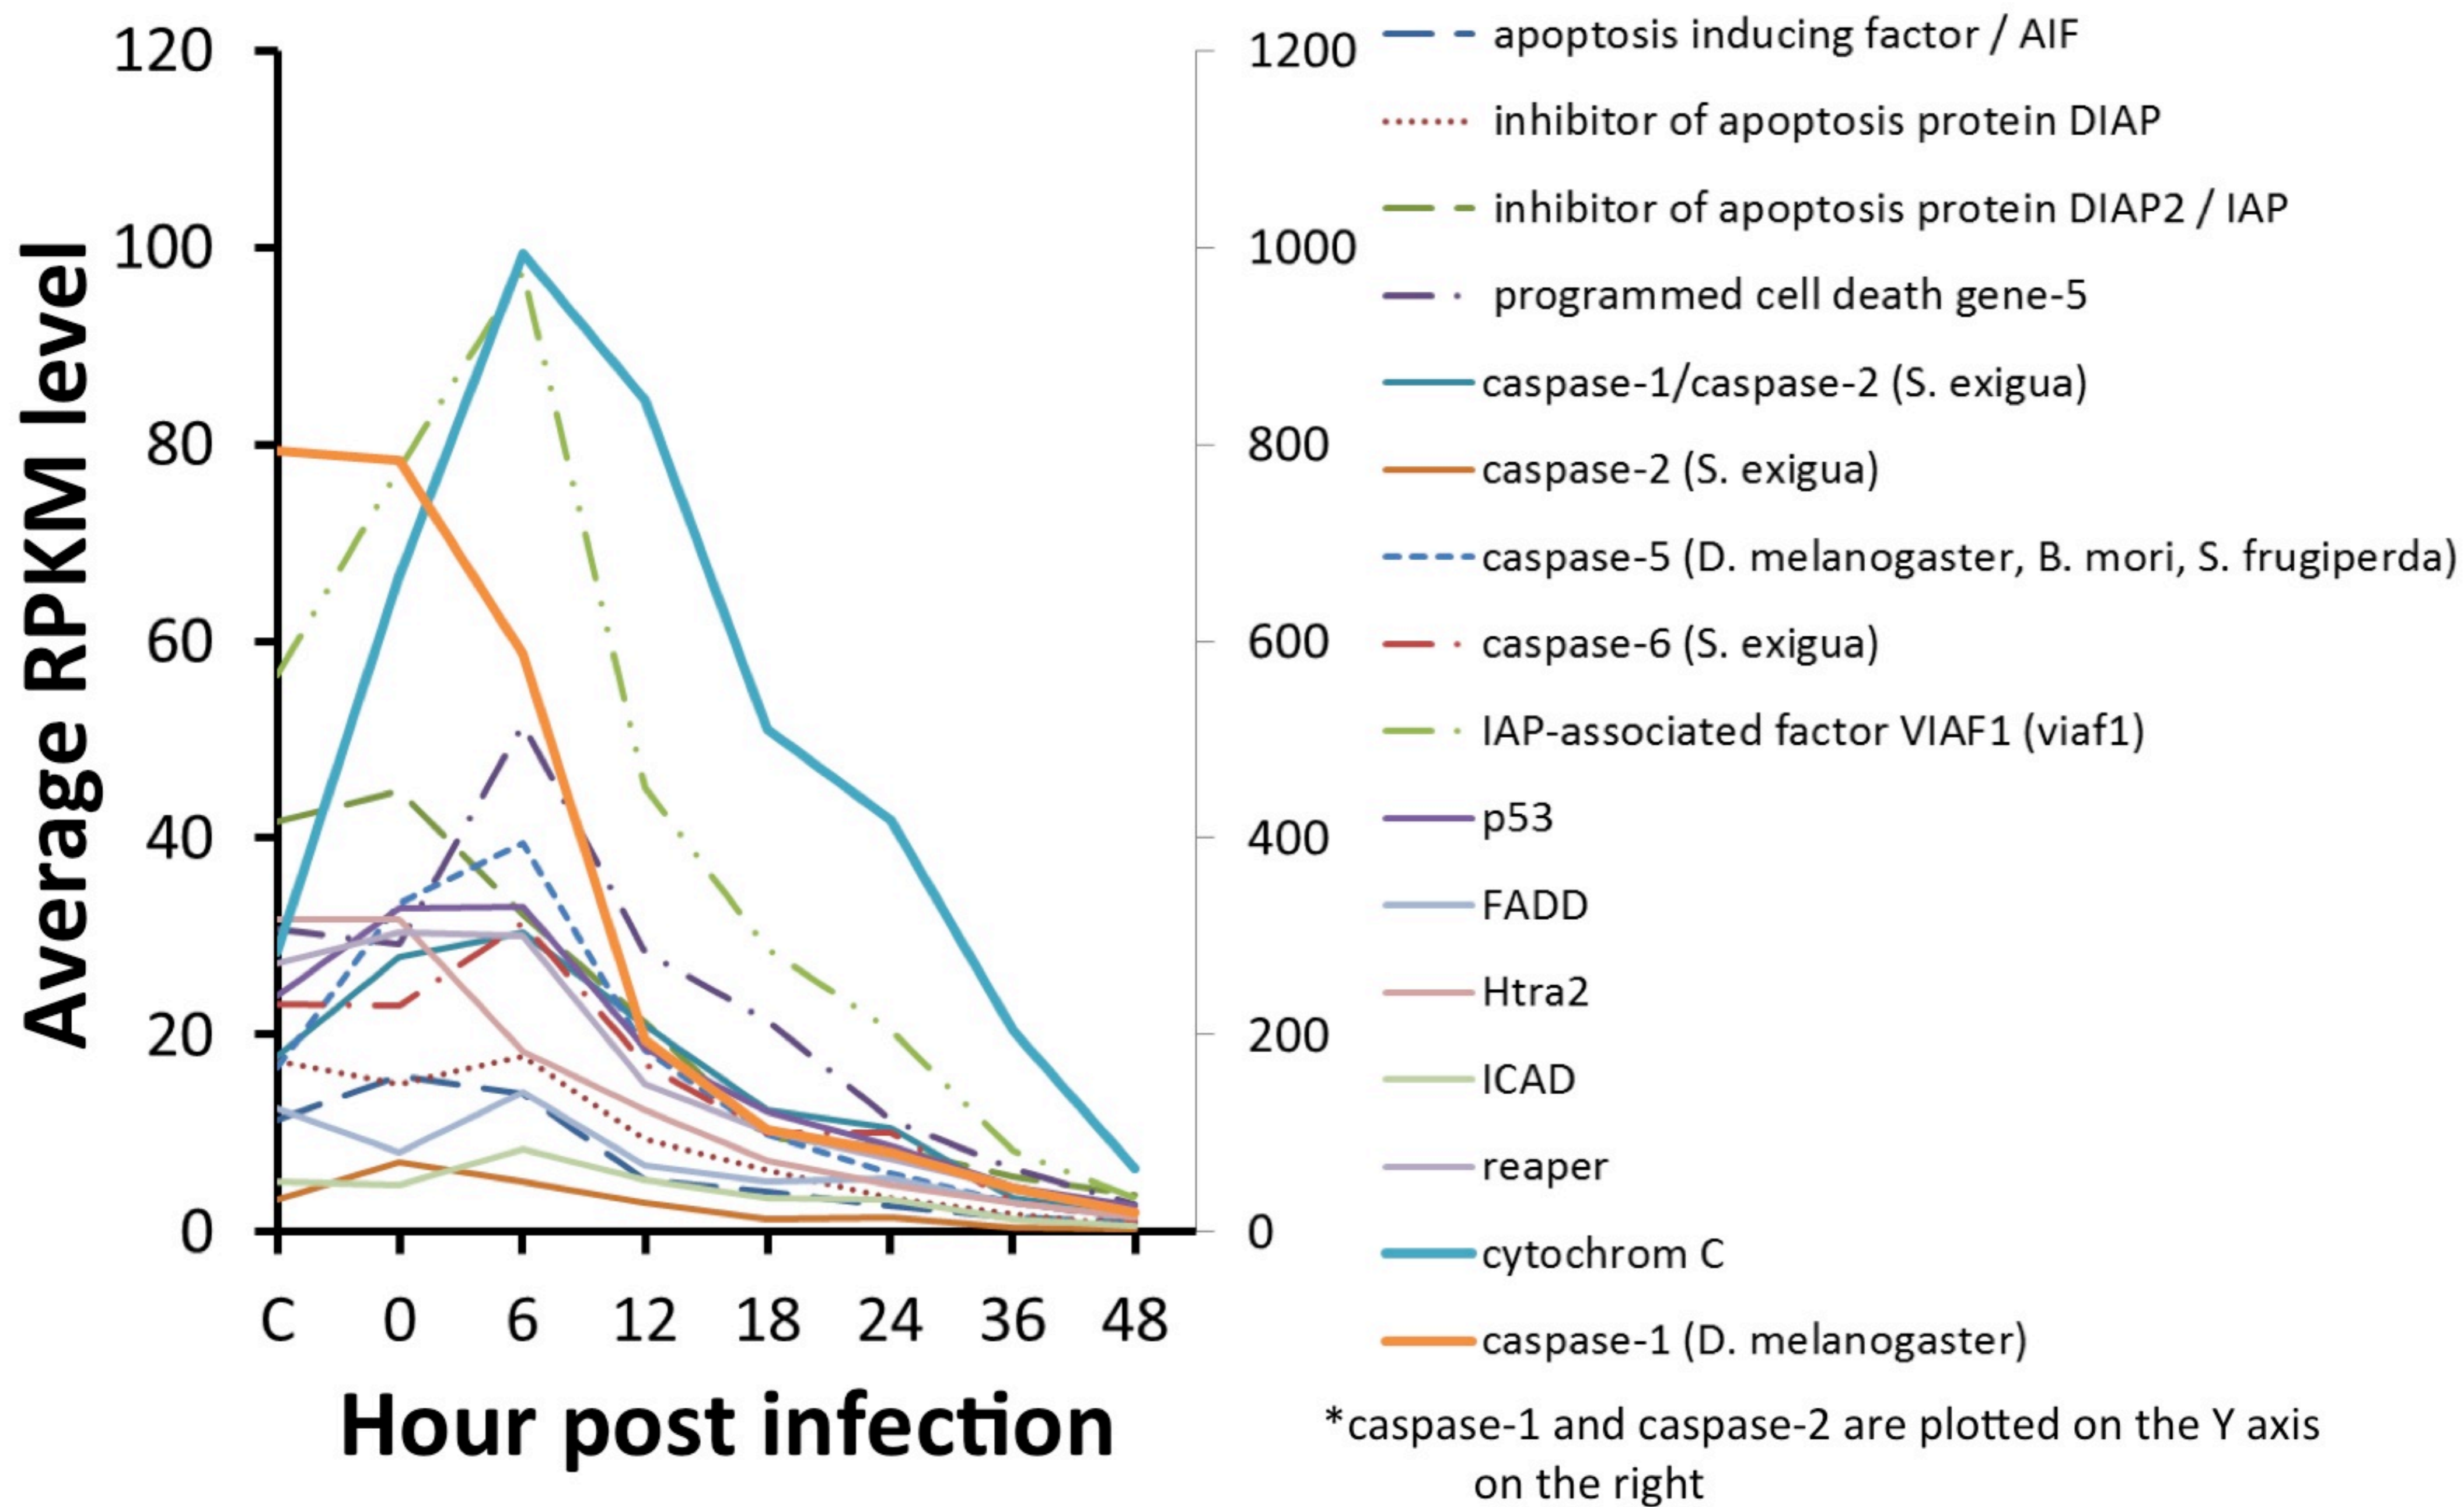

**(B) HSP family**

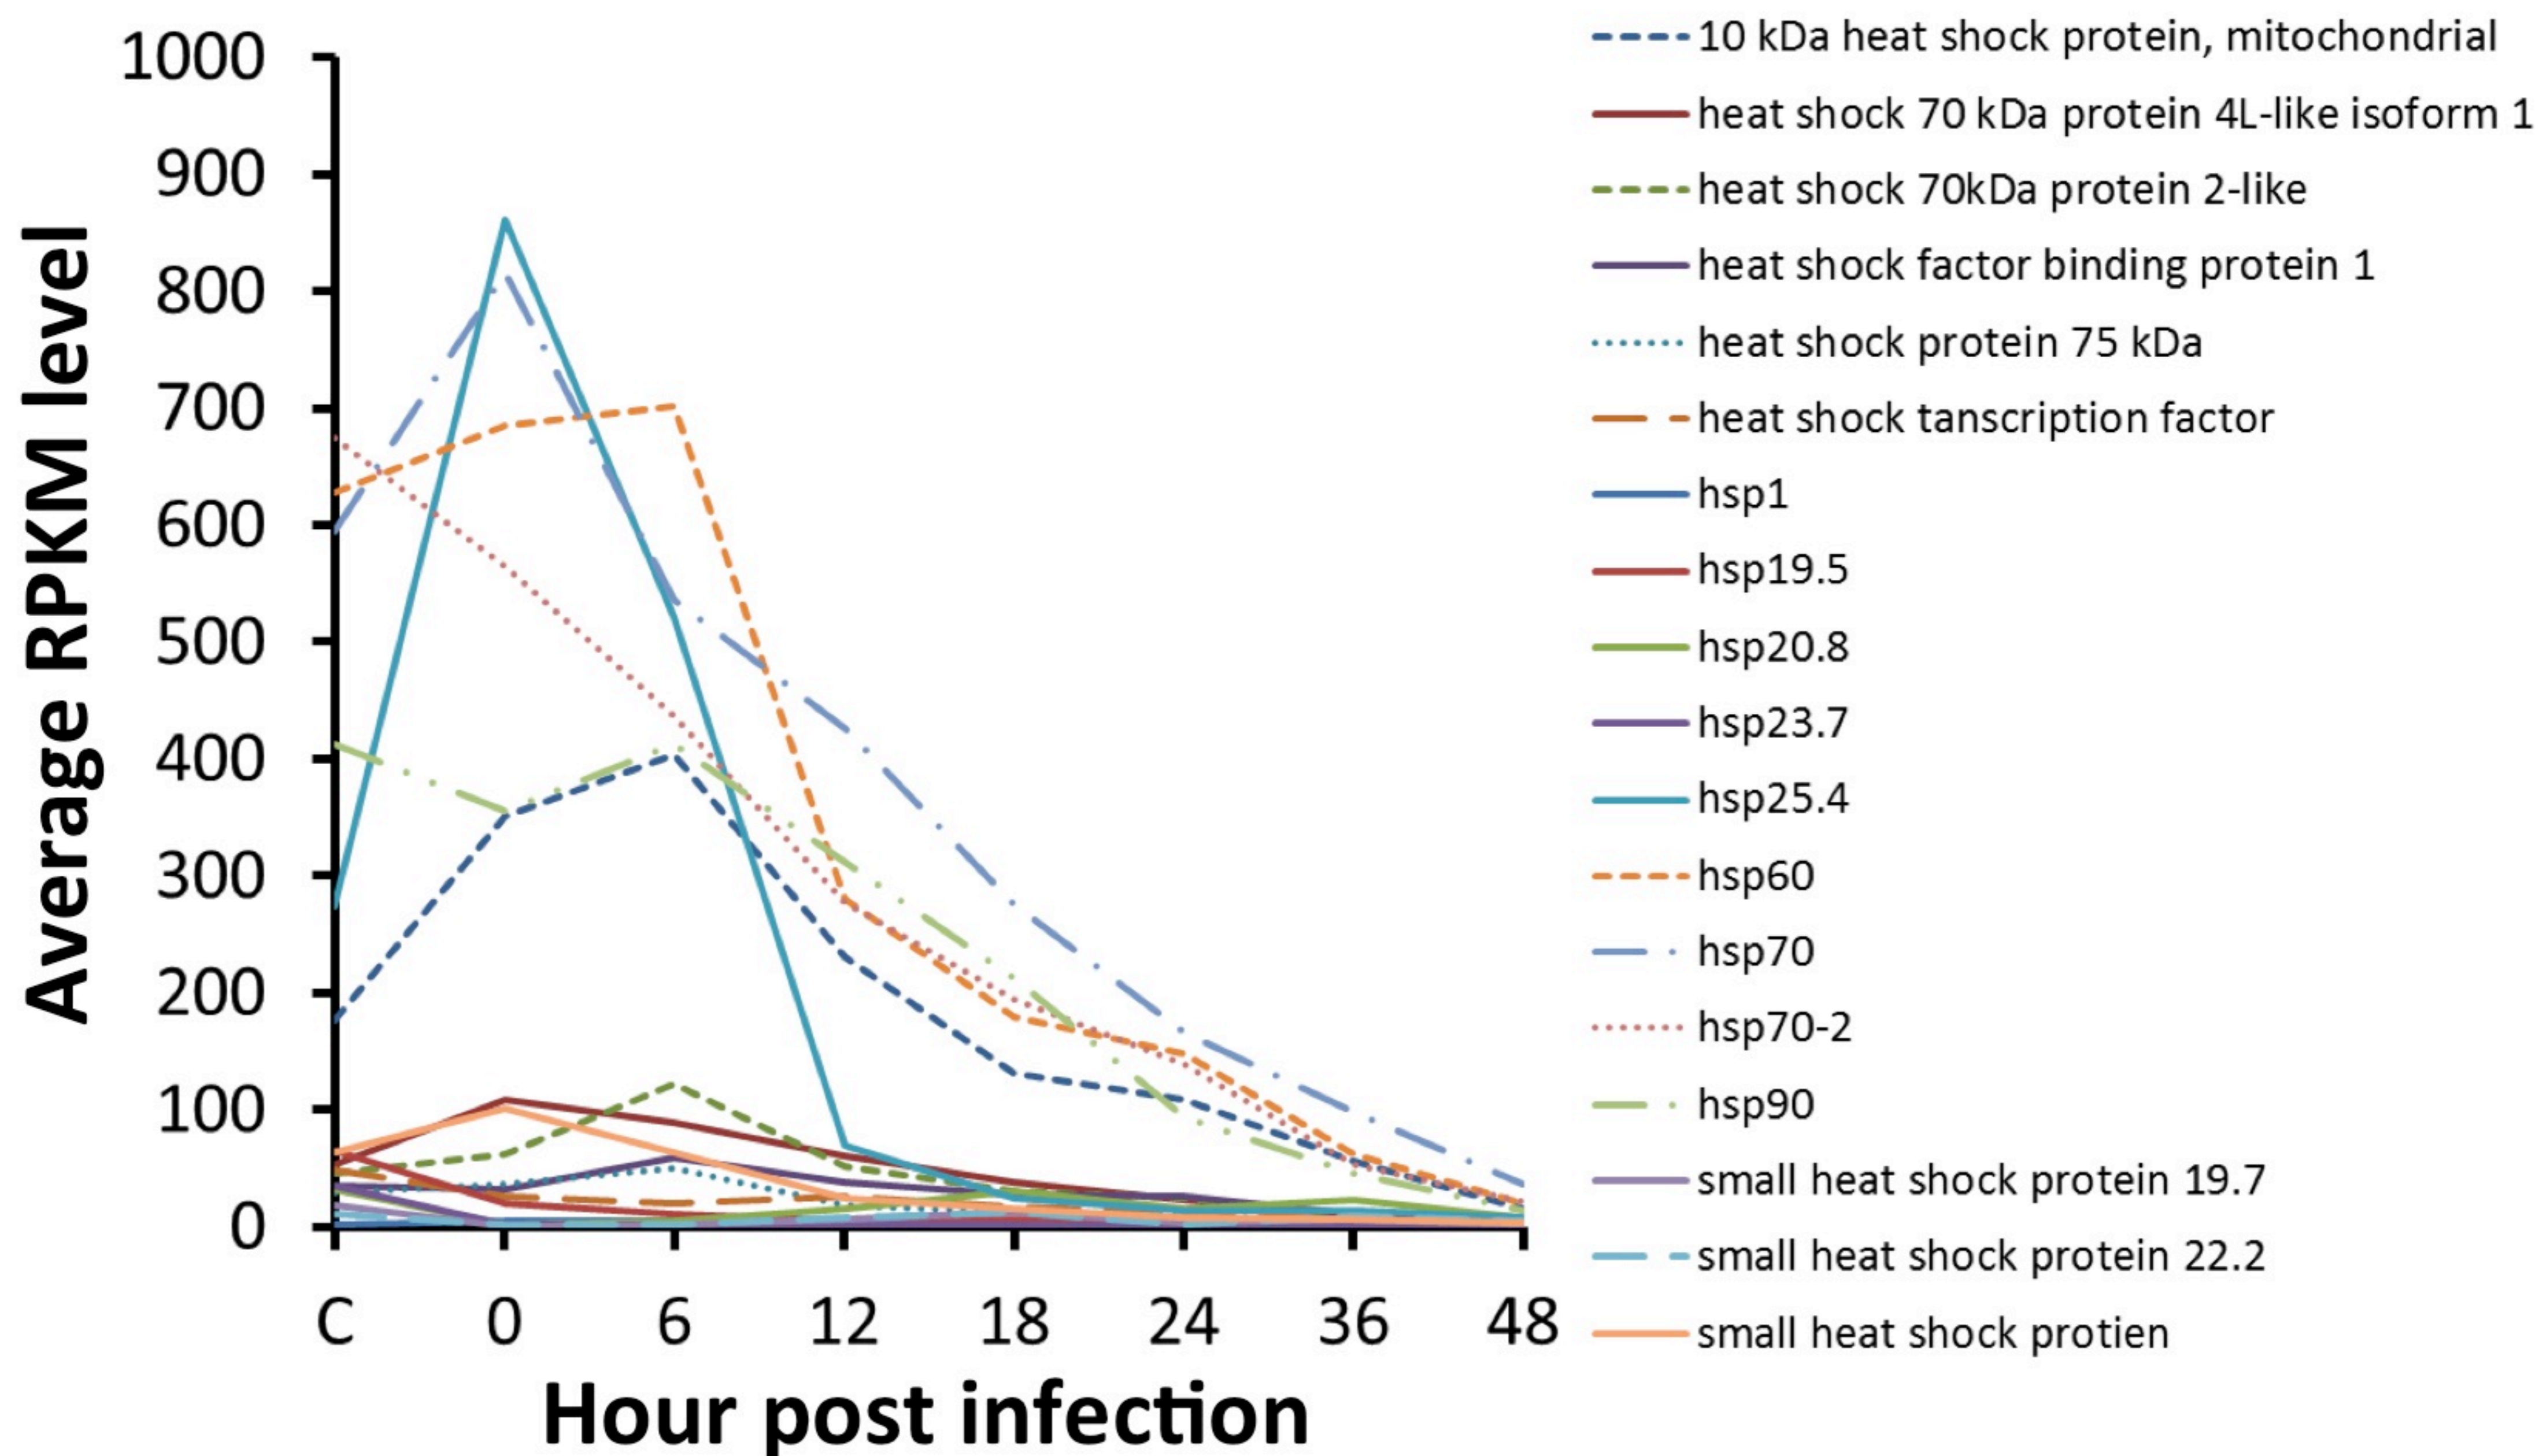



Fig. S8

### (A) Reactive Oxygen Species (ROS)

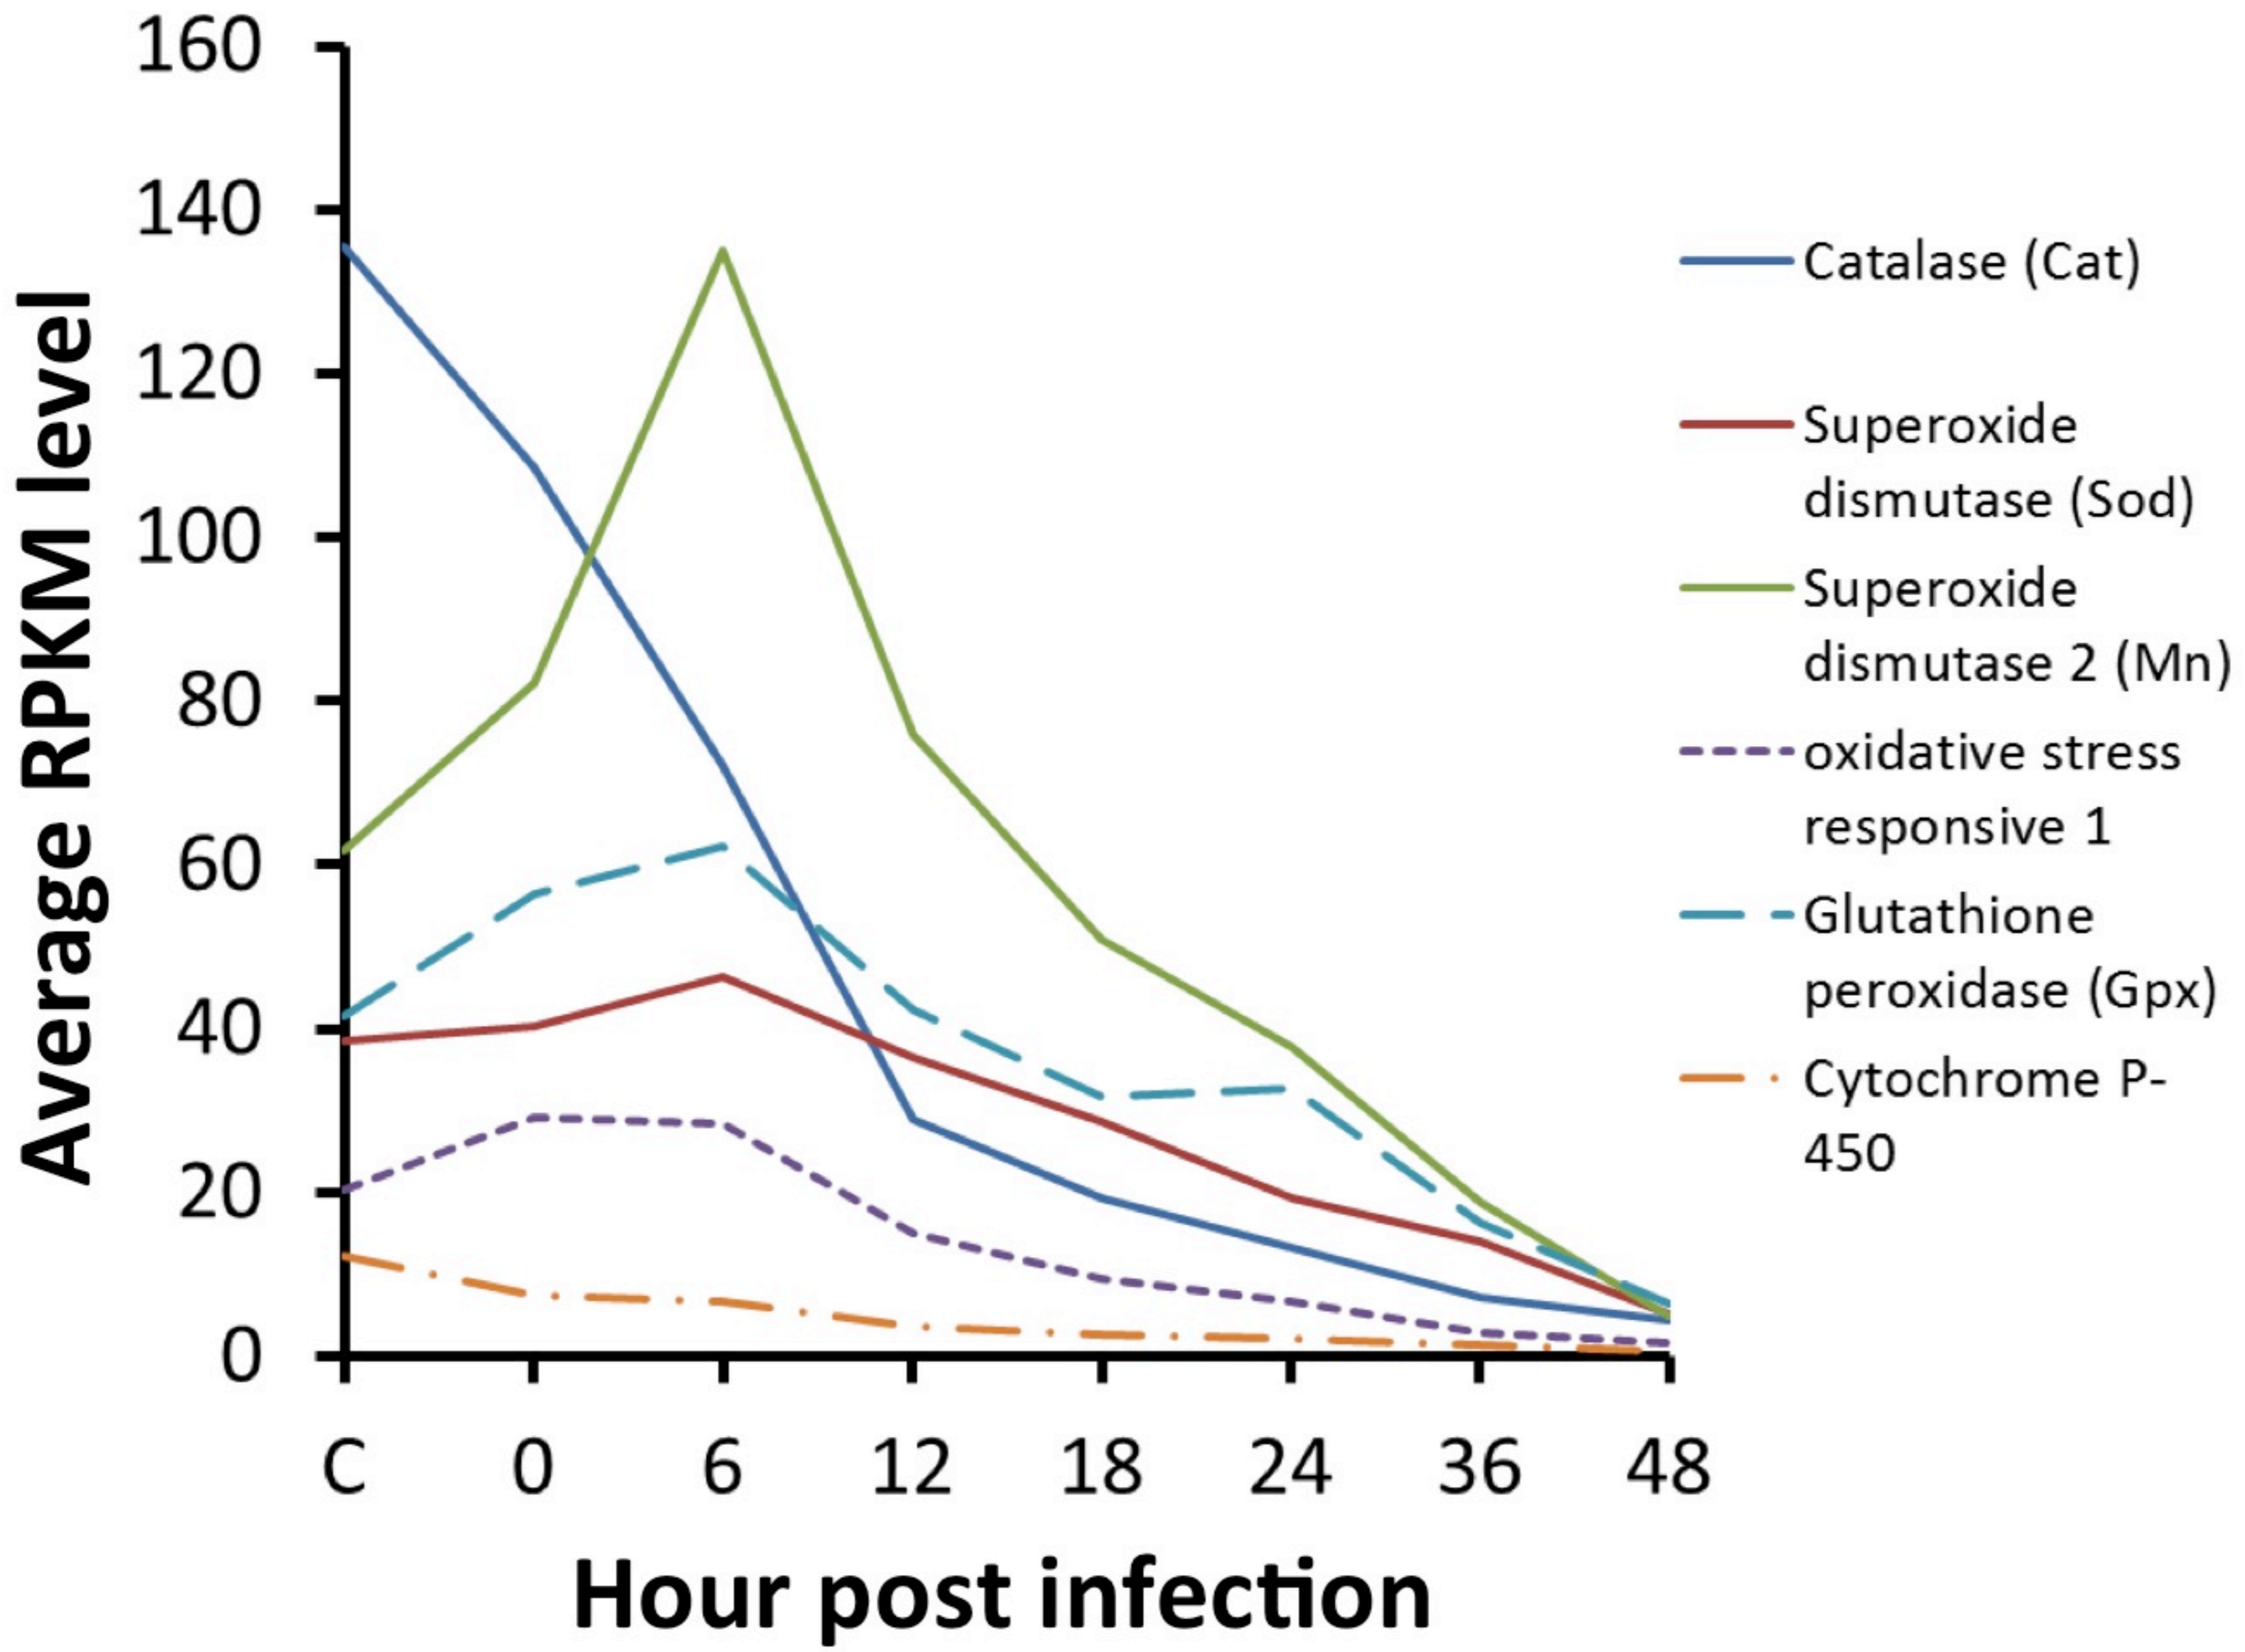

### (B) NFkB-IkB

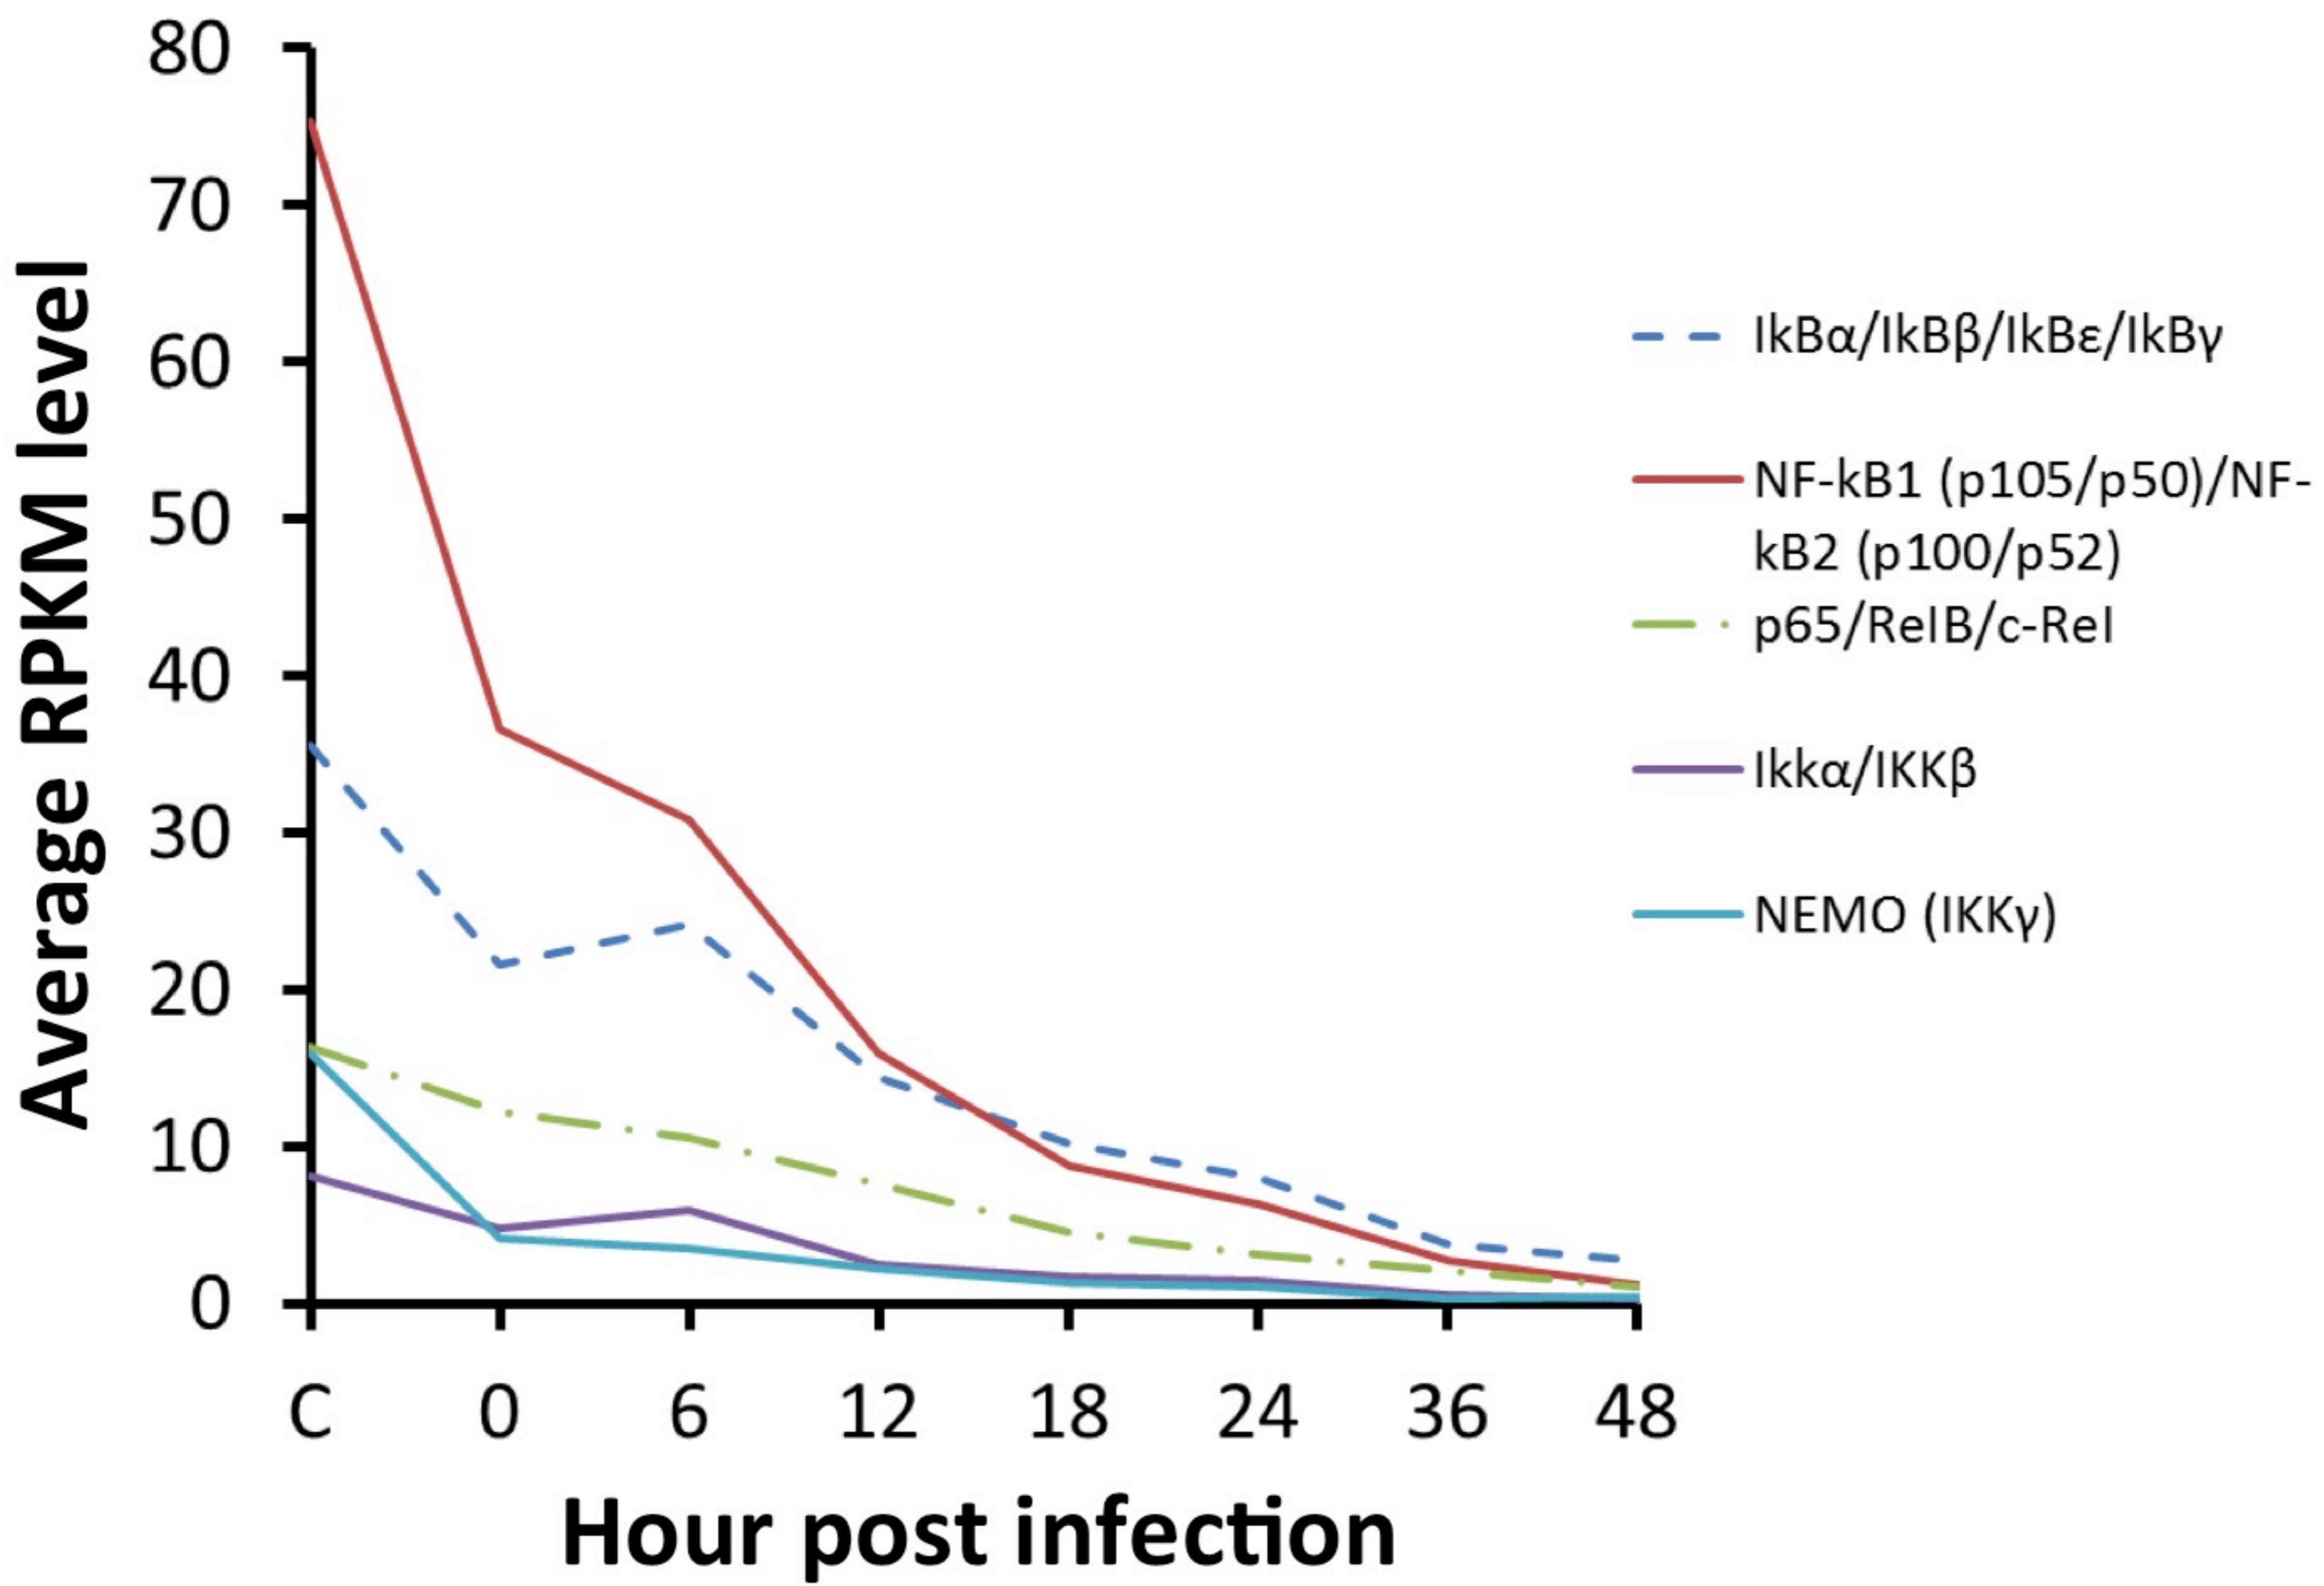



Fig. S9

### (A) IMD and Toll

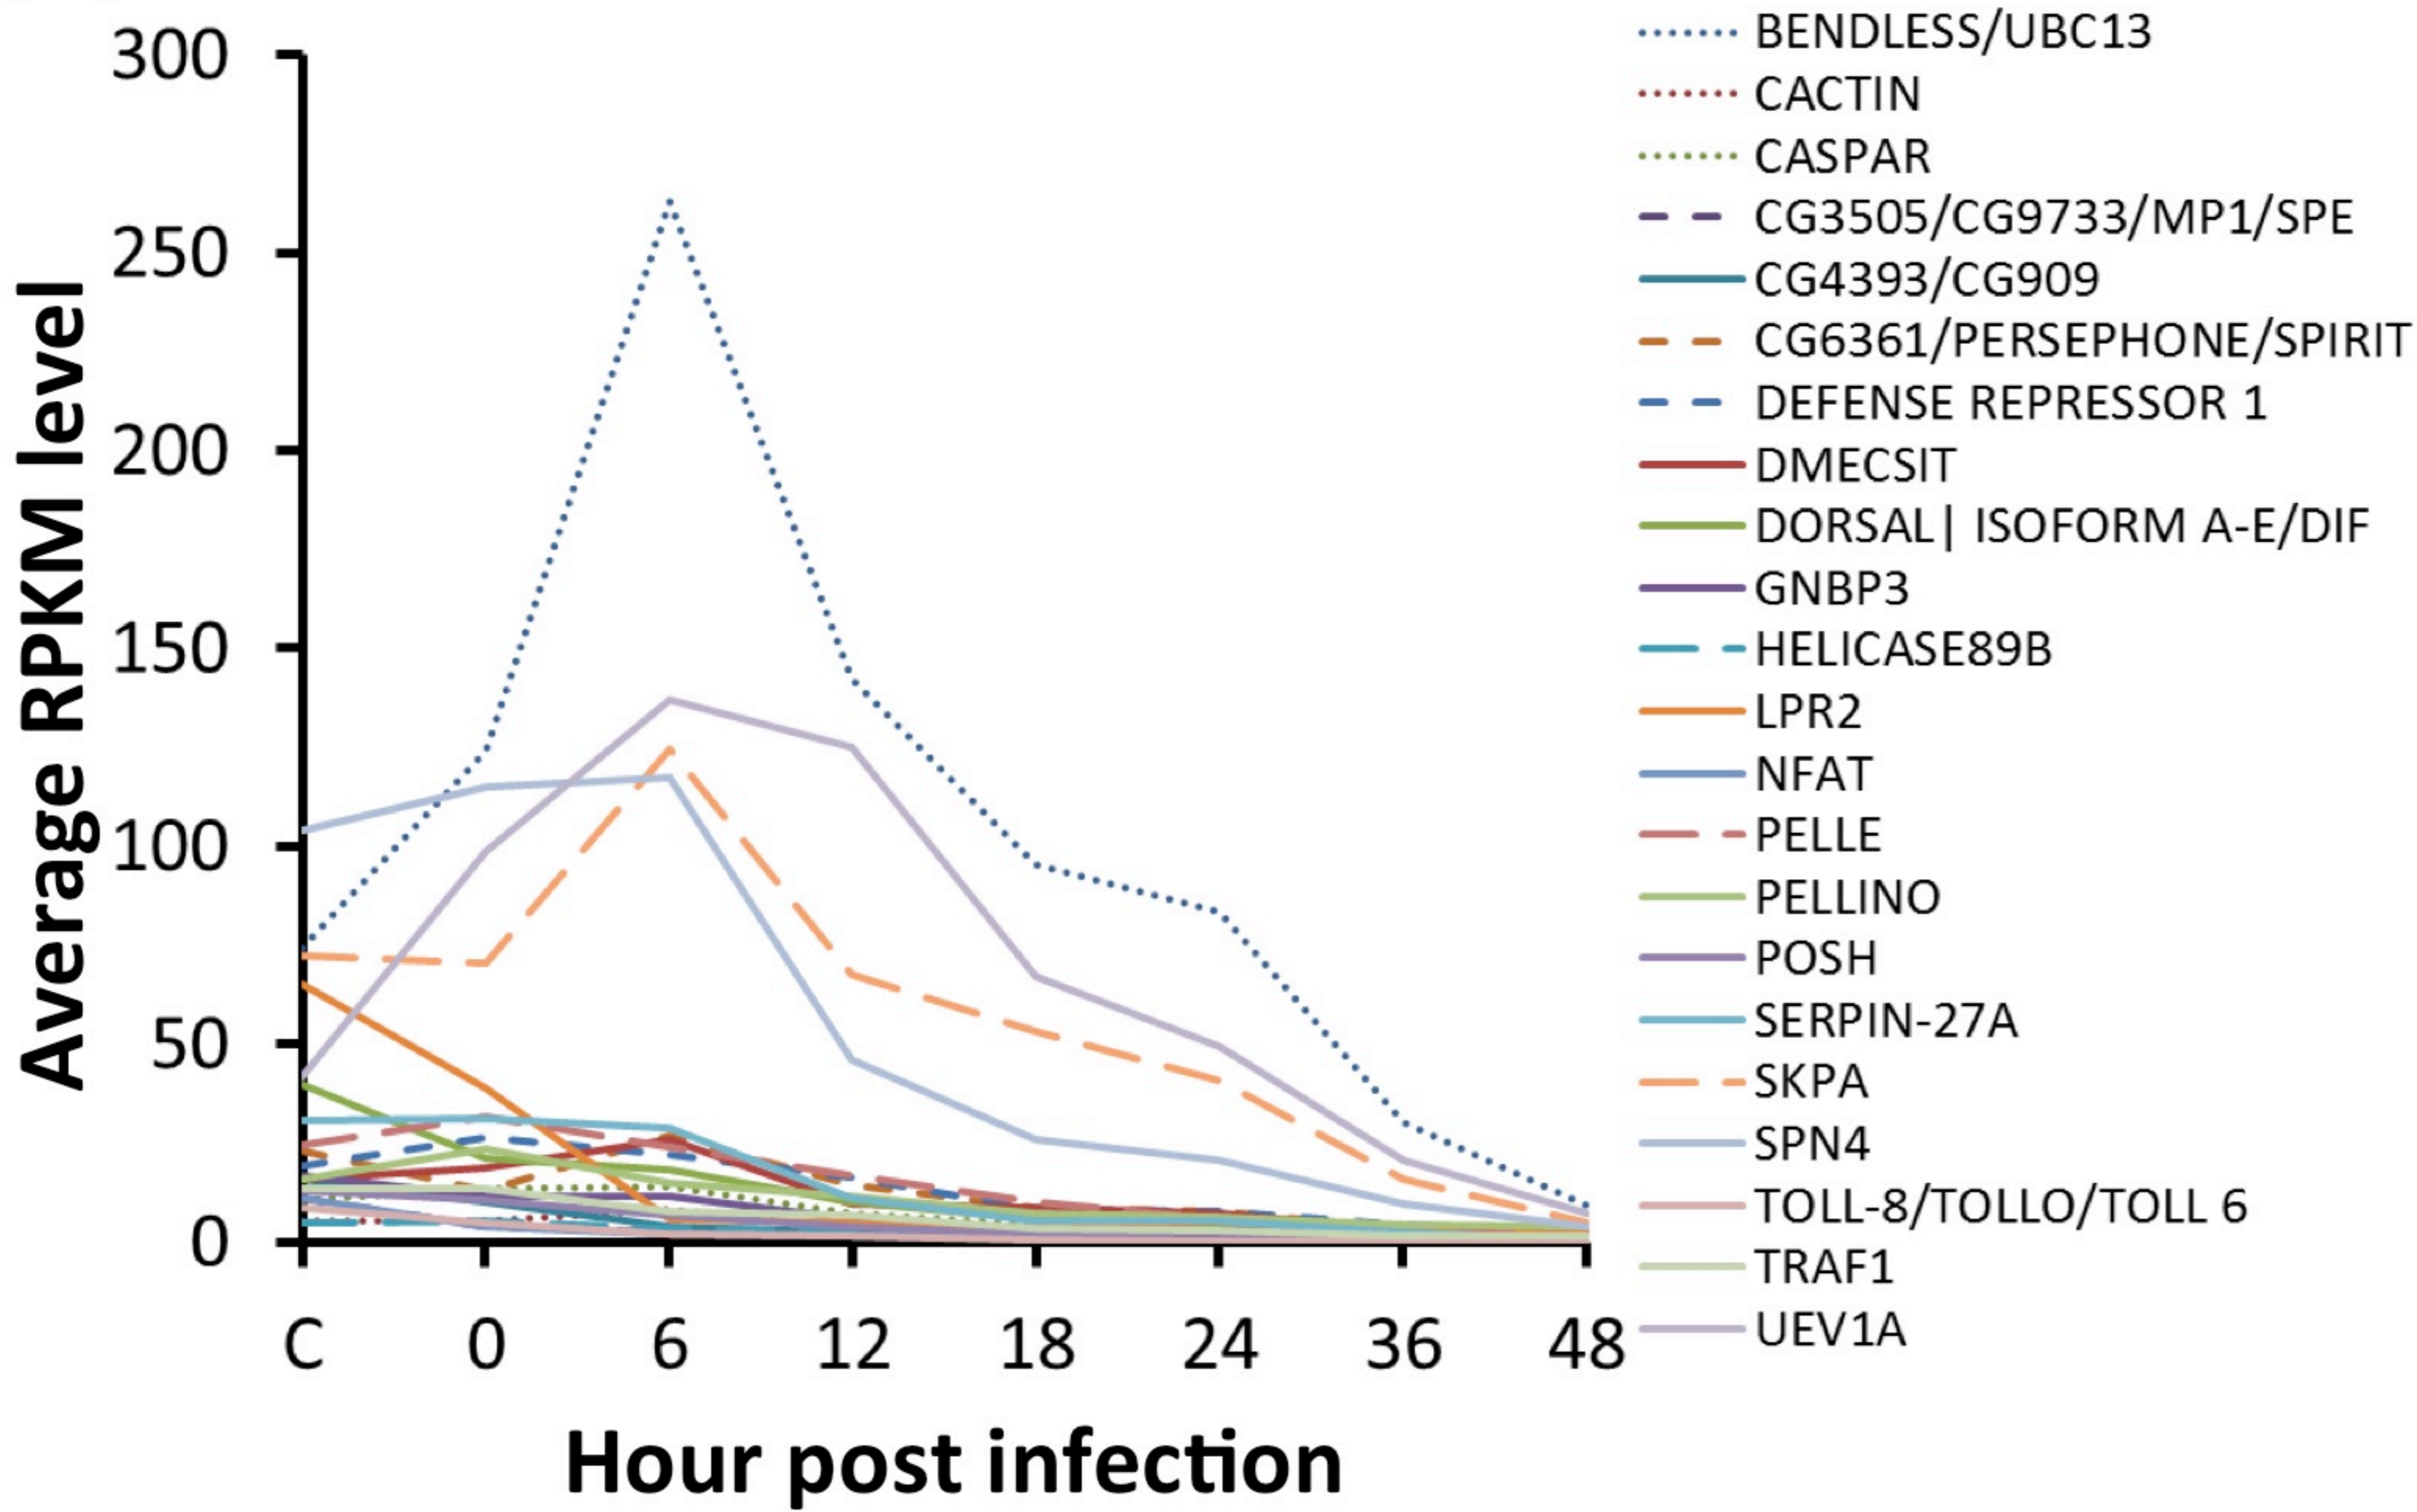

### (B) JAK/STAT

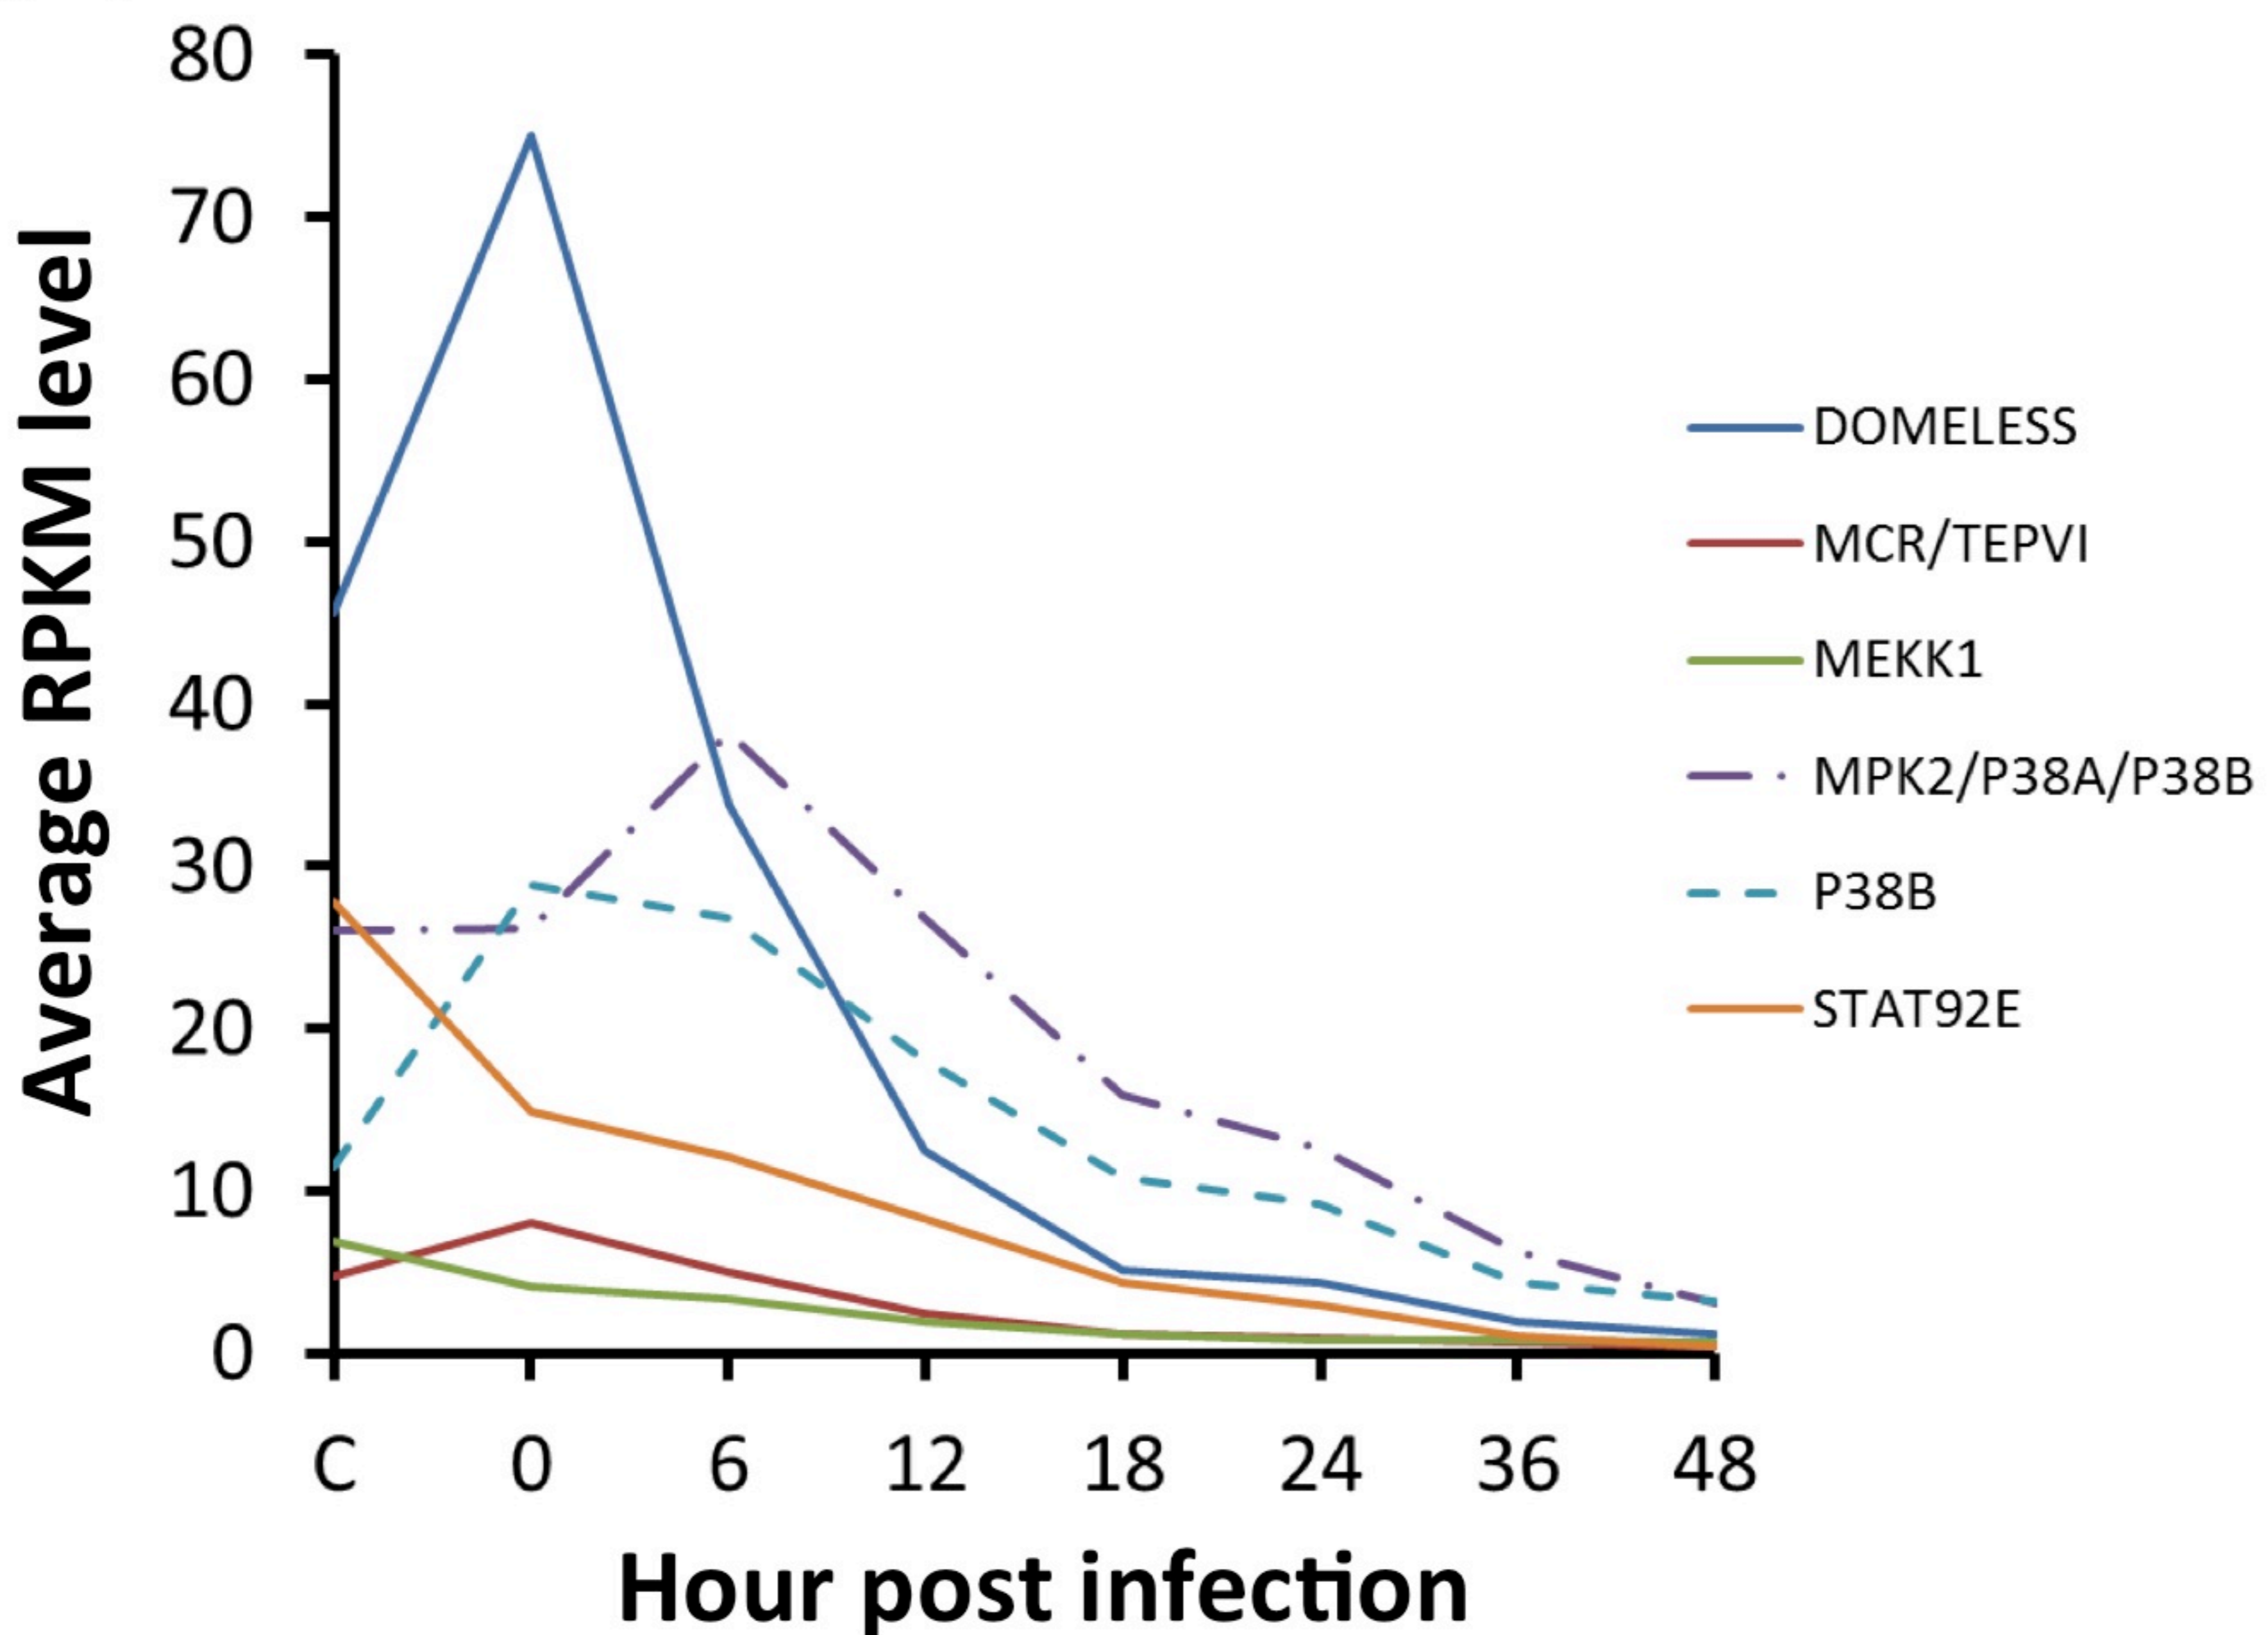



Fig. S10

**(A) JNK**

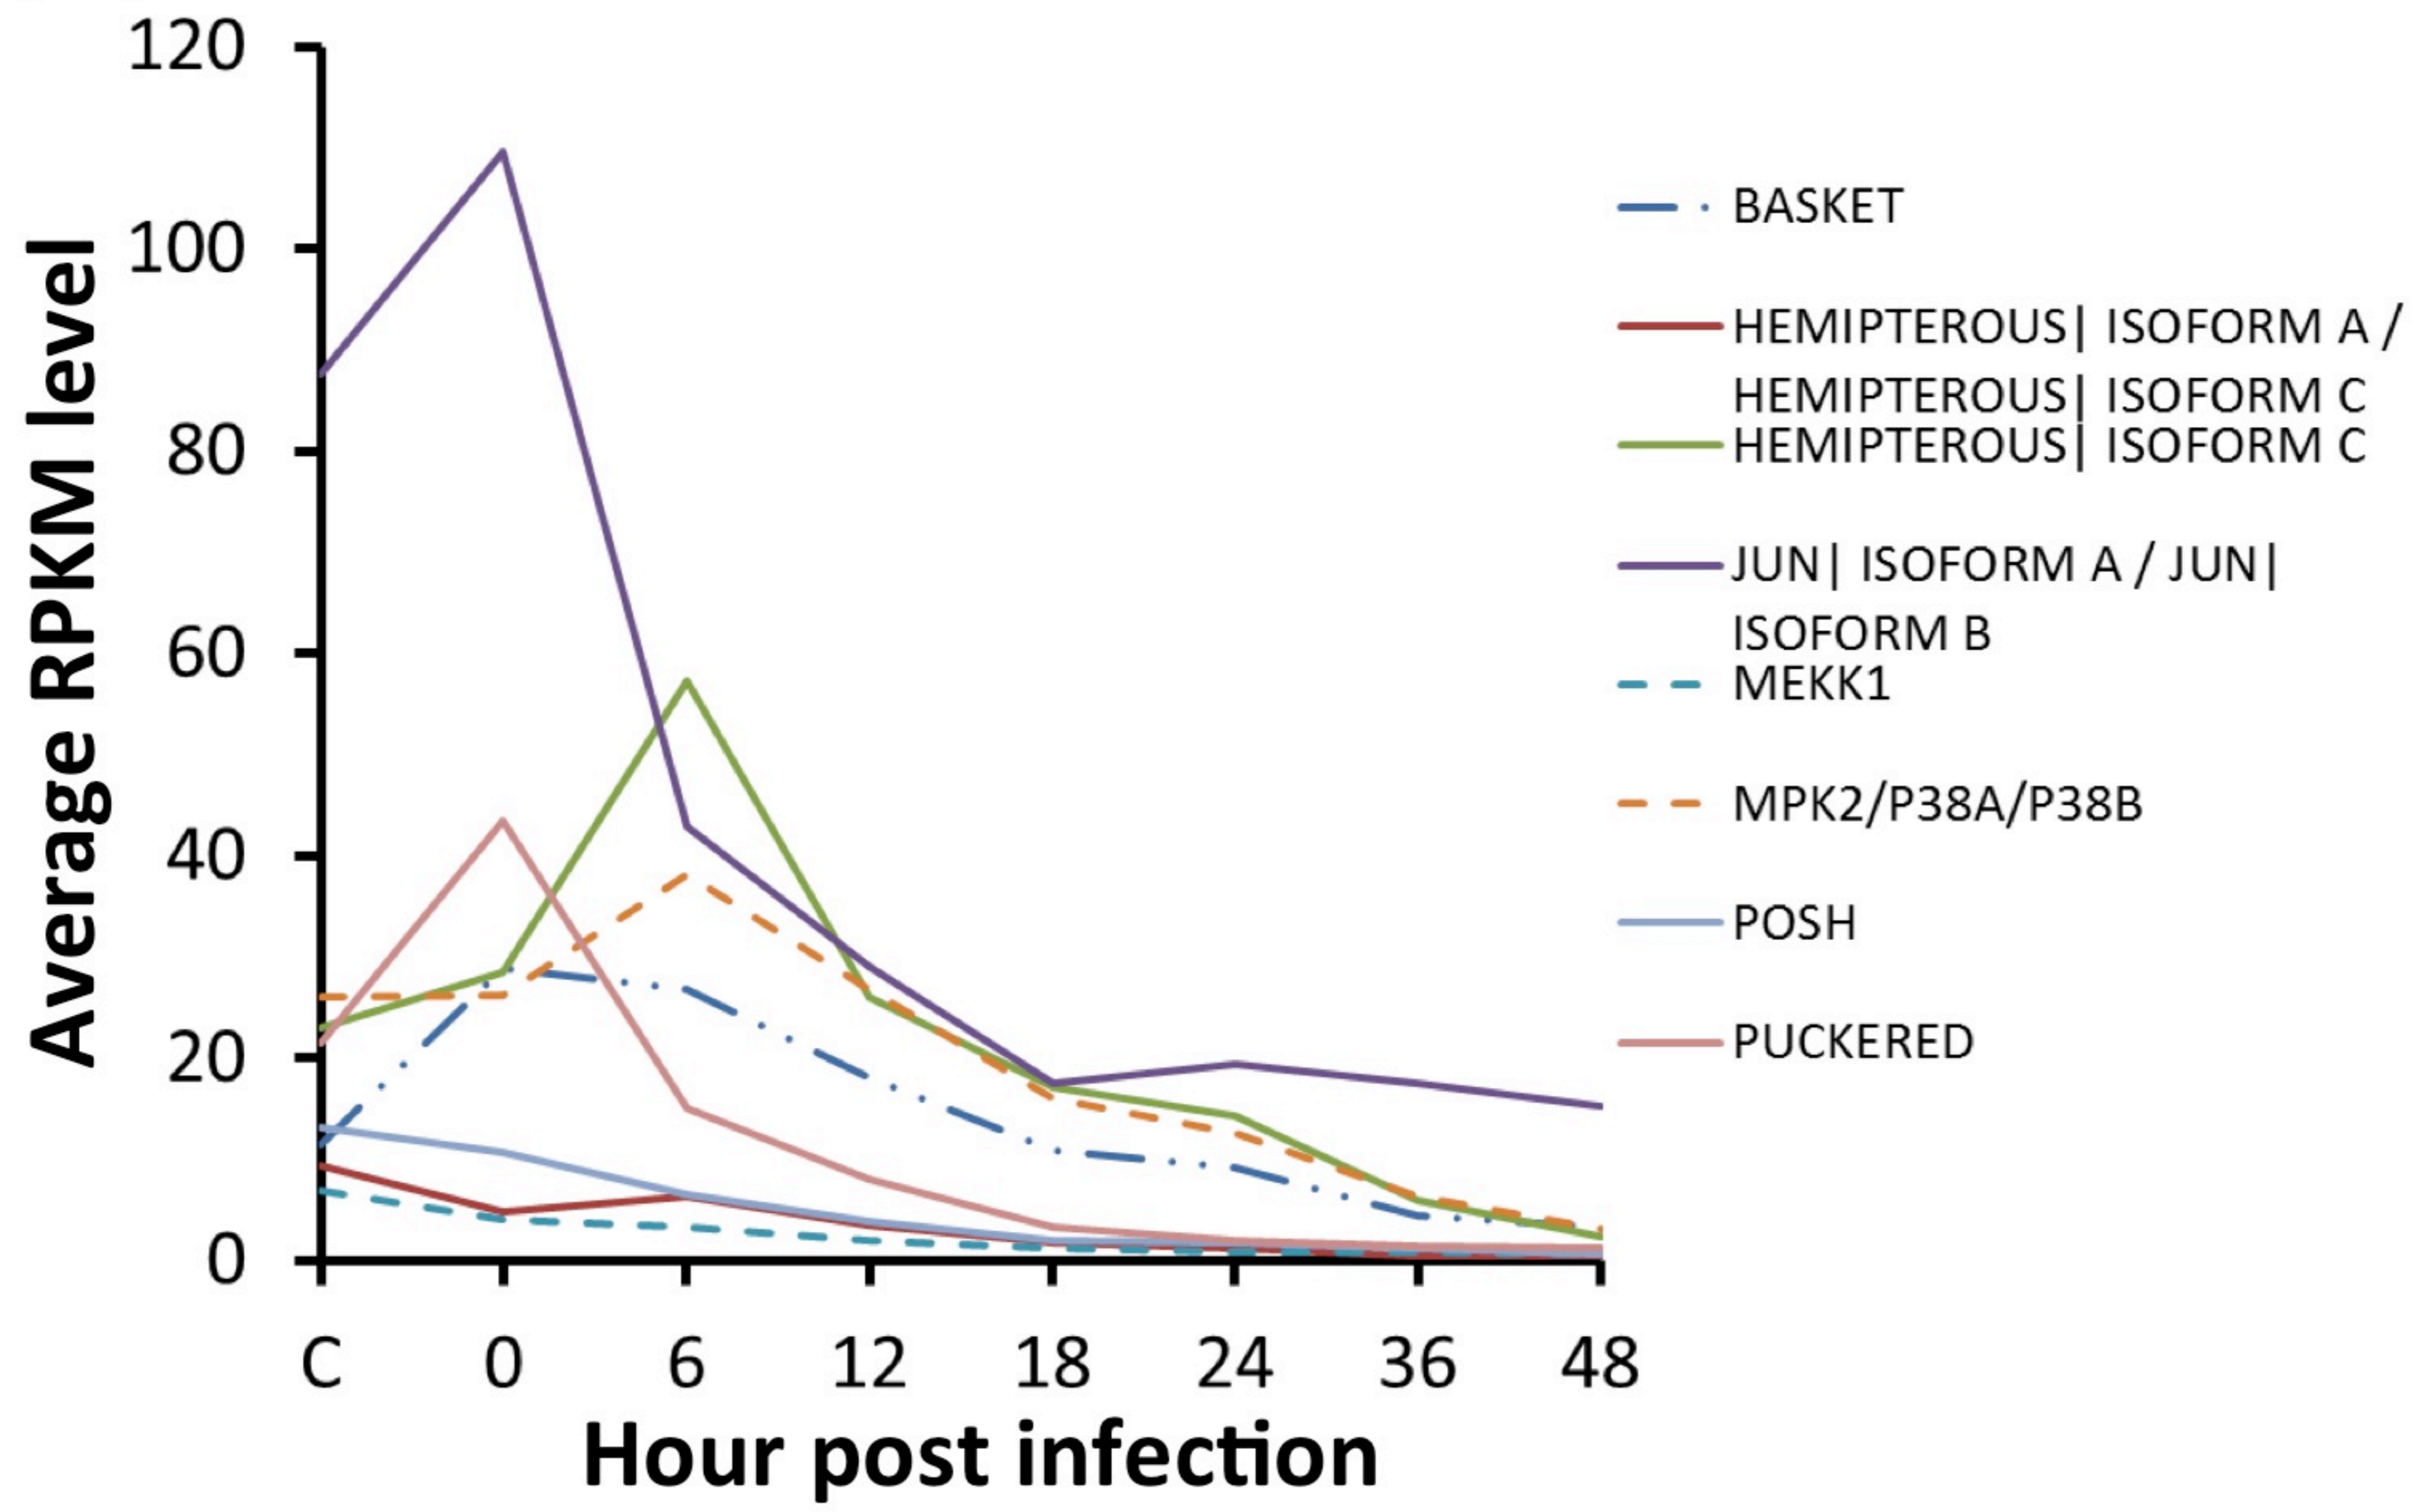

**(B) HDAC and Sirtuins**

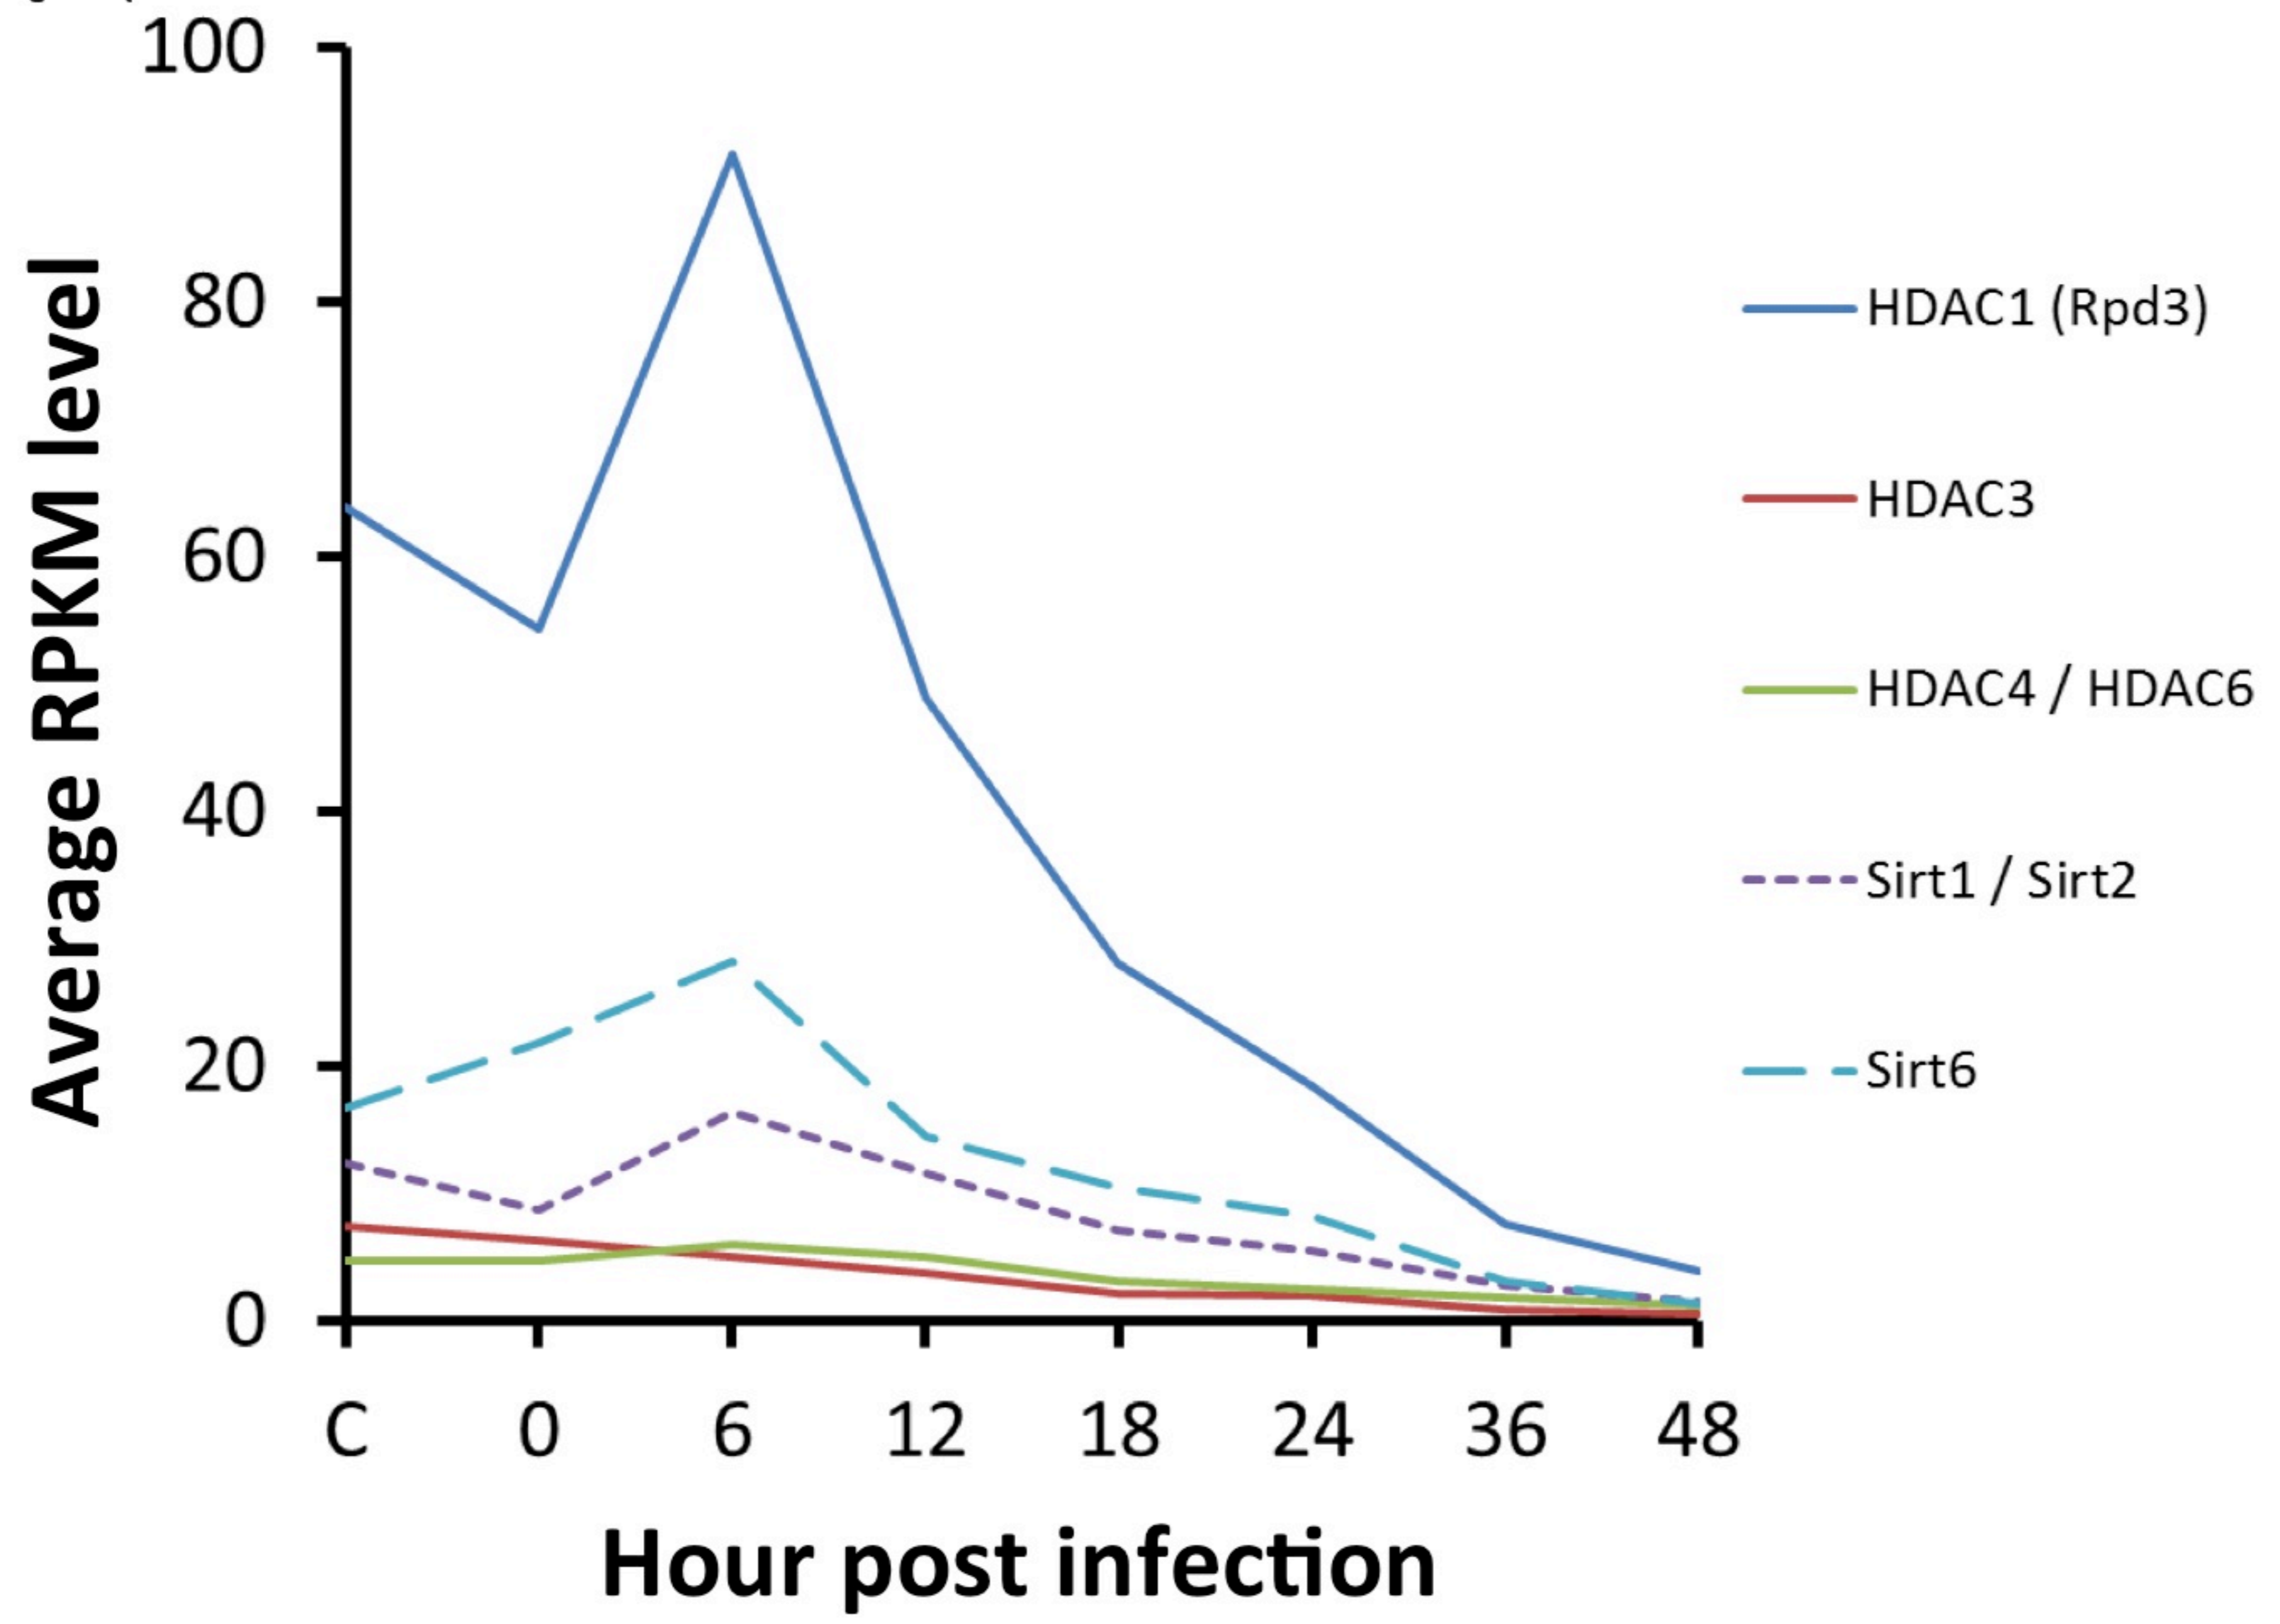

Supplement: JVI.02243-14_zjv999099778so3.pdf [file JVI.02243-14_zjv999099778so3.pdf]
